# Supplementary material for: Caregiver burden and its associated factors among family caregivers of persons with dementia in Shanghai, China: a cross-sectional study
Source: PubMed Central journal article supplement — BMJ Open. 2022 May 23;12(5):e057817. doi: 10.1136/bmjopen-2021-057817 (PMC9174806; doi:10.1136/bmjopen-2021-057817), 2022-05-23
Supplement: bmjopen-2021-057817.draft_revisions.pdf [file bmjopen-2021-057817.draft_revisions.pdf]

# BMJ Open

BMJ Open is committed to open peer review. As part of this commitment we make the peer review history of every article we publish publicly available.

When an article is published we post the peer reviewers' comments and the authors' responses online. We also post the versions of the paper that were used during peer review. These are the versions that the peer review comments apply to.

The versions of the paper that follow are the versions that were submitted during the peer review process. They are not the versions of record or the final published versions. They should not be cited or distributed as the published version of this manuscript.

BMJ Open is an open access journal and the full, final, typeset and author-corrected version of record of the manuscript is available on our site with no access controls, subscription charges or pay-per-view fees (<http://bmjopen.bmj.com>).

If you have any questions on BMJ Open's open peer review process please email [info.bmjopen@bmj.com](mailto:info.bmjopen@bmj.com)

# BMJ Open

## A Study on the Family Caregivers' Burden of Dementia Patients in Chinese Community

|                               |                                                                                                                                                                                                                                                                                                                                                                                                                                                                                                                                                                                                                                                                                |
|-------------------------------|--------------------------------------------------------------------------------------------------------------------------------------------------------------------------------------------------------------------------------------------------------------------------------------------------------------------------------------------------------------------------------------------------------------------------------------------------------------------------------------------------------------------------------------------------------------------------------------------------------------------------------------------------------------------------------|
| Journal:                      | <i>BMJ Open</i>                                                                                                                                                                                                                                                                                                                                                                                                                                                                                                                                                                                                                                                                |
| Manuscript ID                 | bmjopen-2021-057817                                                                                                                                                                                                                                                                                                                                                                                                                                                                                                                                                                                                                                                            |
| Article Type:                 | Original research                                                                                                                                                                                                                                                                                                                                                                                                                                                                                                                                                                                                                                                              |
| Date Submitted by the Author: | 03-Oct-2021                                                                                                                                                                                                                                                                                                                                                                                                                                                                                                                                                                                                                                                                    |
| Complete List of Authors:     | Liu, Zhijian; Second Military Medical University School of Nursing, wenjing, sun; Shanghai Changzheng Hospital, neurology<br>Chen, Honglin; Fudan University<br>Zhuang, Jianhua; Shanghai Changzheng Hospital, Department of Neurology<br>Wu, Bei; New York University, Rory Meyers College of Nursing<br>Xu, Hanzhang; Duke University School of Nursing; Duke University School of Medicine,<br>Li, Peng; Shanghai Changzheng Hospital, Department of Neurology<br>Chen, Xiaohan; Shanghai Changzheng Hospital, Department of Neurology<br>Li, Juan; Second Military Medical University School of Nursing<br>Yin, You; Shanghai Changzheng Hospital, Department of Neurology |
| Keywords:                     | Dementia < NEUROLOGY, Adult intensive & critical care < ANAESTHETICS, Health policy < HEALTH SERVICES ADMINISTRATION & MANAGEMENT                                                                                                                                                                                                                                                                                                                                                                                                                                                                                                                                              |
|                               |                                                                                                                                                                                                                                                                                                                                                                                                                                                                                                                                                                                                                                                                                |

SCHOLARONE™  
Manuscripts

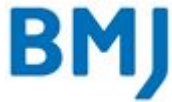

I, the Submitting Author has the right to grant and does grant on behalf of all authors of the Work (as defined in the below author licence), an exclusive licence and/or a non-exclusive licence for contributions from authors who are: i) UK Crown employees; ii) where BMJ has agreed a CC-BY licence shall apply, and/or iii) in accordance with the terms applicable for US Federal Government officers or employees acting as part of their official duties; on a worldwide, perpetual, irrevocable, royalty-free basis to BMJ Publishing Group Ltd ("BMJ") its licensees and where the relevant Journal is co-owned by BMJ to the co-owners of the Journal, to publish the Work in this journal and any other BMJ products and to exploit all rights, as set out in our [licence](#).

The Submitting Author accepts and understands that any supply made under these terms is made by BMJ to the Submitting Author unless you are acting as an employee on behalf of your employer or a postgraduate student of an affiliated institution which is paying any applicable article publishing charge ("APC") for Open Access articles. Where the Submitting Author wishes to make the Work available on an Open Access basis (and intends to pay the relevant APC), the terms of reuse of such Open Access shall be governed by a Creative Commons licence – details of these licences and which [Creative Commons](#) licence will apply to this Work are set out in our licence referred to above.

Other than as permitted in any relevant BMJ Author's Self Archiving Policies, I confirm this Work has not been accepted for publication elsewhere, is not being considered for publication elsewhere and does not duplicate material already published. I confirm all authors consent to publication of this Work and authorise the granting of this licence.

# A Study on the Family Caregivers' Burden of Dementia Patients in Chinese Community

Zhijian Liu<sup>#a,b</sup>, Wenjing Sun<sup>#b,c</sup>, Honglin Chen<sup>#d</sup>, Jianhua Zhuang<sup>b</sup>, Bei Wu<sup>e</sup>, Hanzhang Xu<sup>f,g</sup>, Peng Li<sup>b</sup>, Xiaohan Chen<sup>b</sup>, Juan Li<sup>\*\*a</sup>, You Yin<sup>\*b</sup>

a Navy Medical University School of Nursing, Shanghai, China

b Department of Neurology, Changzheng Hospital, Navy Medical University, Shanghai, 200003, China

c Department of Neurology, Third Affiliated Hospital of the Naval Medical University, Shanghai, 200003, China

d Department of Social Work School of Social Development and Public Policy, Fudan University, Shanghai, China

e New York University Rory Meyers College of Nursing, New York, NY, United States,

f Duke University School of Nursing, Durham, NC, United States

g Duke University School of Medicine, Durham, NC, United States

# Wenjing Sun<sup>#b,c</sup>, Honglin Chen equal to Zhijian Liu.

\*Corresponding author: You Yin, [yinyou179@163.com](mailto:yinyou179@163.com);

\*\*Corresponding author: Juan Li, [lijuanjr@126.com](mailto:lijuanjr@126.com)

**Key Words:** Dementia, Caregiver burden, Family caregivers, Community

## ABSTRACT

**Objective** To explore the level and related factors of caregiver burden of people with dementia (PWD) in Shanghai. **Methods** A cross-sectional survey was conducted. 109 PWDs with family caregivers were recruited. We collected socio-demographic information, tested caregivers' caregiver burden inventory (CBI), positive aspects of caregiving (PAC), community service needs, social support, cope strategy of, and PWDs' cognitive function, sleep quality, Activities of daily living, and neuropsychiatric symptoms. Multiple linear regression and moderate effect was tested. **Result** The average score of CBI was  $65.92 \pm 16.74$ . The results showed that the MoCA, PAC, and social support were negatively associated ( $\beta = -0.84$ ,  $p < 0.001$ ,  $\beta = -3.61$ ,  $p = 0.03$ ,  $\beta = -1.22$ ,  $p = 0.001$ , respectively) while the community service needs were positively associated ( $\beta = 3.46$ ,  $p < 0.001$ ) with caregivers burden. Besides, social support moderated the relationship between the caregiver burden and caregiver's depression. **Conclusion** Caregiver burden was associated with various factors. Strengthening social support, providing efficient community service, relieving depression may reduce caregiver burden.

### Strengths and limitations of this study

The study explored the level and related factors of caregiver burden of people with dementia (PWD) in Shanghai which is the most aging city in China.

1 The conclusion of our study may provide strategy of reducing the caregiver burden of PWDs' caregivers.

2  
3 Participants were recruited from Hongkou district in Shanghai. Hongkou district is one of the central urban areas  
4 in Shanghai and Shanghai has advanced healthcare system. Due to the disparities of economic and social  
5 developmental levels in China, the participants in this study may not be representative of PWDs and caregivers in  
6  
7 China.

8  
9  
10 The sample size was relatively small. Large sample multi-center studies are needed to confirm the result.

11  
12 The study was a cross-sectional study and cause-and-effect relationships cannot be established. Besides, this  
13 cross-sectional study is not able to explore the trajectory of caregiver burden across different disease stages.  
14  
15 Longitudinal studies are needed in future.

## 16 17 18 INTRODUCTION

19  
20 With the rapid development of society, population aging is becoming a prominent problem. With the increasing  
21 age, numerous underlying physiological changes occur, and the risk of the chronic disease rises<sup>1</sup>. Dementia is one of  
22 the striking diseases followed by the aging of the population. The age standardized prevalence of dementia for old  
23 adults aged  $\geq 60$  varies from 5% to 7% in the most regions around the world<sup>Error! Reference source not found.</sup>. According to the  
24 report of global population in 2017, there are nearly 25% old adults aged over 60 in China. The number of old adults  
25 aged over 60 is expected to increase to 478.8 million (35.1%) in 2050 according to the Department of Economic and  
26 Social Affairs of the United Nations<sup>3</sup>. The age standardized prevalence of dementia in China is 6%. There are almost  
27 7.4 million PWDs in China. The number will grow to 18 million by 2030 if no effective preventions are  
28 implemented<sup>Error! Reference source not found.</sup>.

29  
30 Dementia is characterized by the deterioration of intellectual functions, dysfunction with executive function,  
31 sleeping disorders, emotional problem, and behavioral and psychological symptoms<sup>5</sup>. Due to the negative impact on  
32 persons' abilities of daily life (ADL) and quality of life by these symptoms, the PWDs relies on their caregivers'  
33 support for daily activities. Caregivers will have to confront increasing dementia-related symptoms over time, which  
34 will cause increasing burden. The caregiver burden is defined as the extent to which caregivers perceived their  
35 emotional or physical health, social life, and financial status as a result of caring for their relatives<sup>6</sup>. Due to negative  
36 consequences of dementia, the caregiver burden had been found to be high among population without dementia<sup>Error!</sup>  
37  
38 <sup>Error! Reference source not found.</sup>. To reduce caregiver burden of PWDs, it is essential to identify factors affecting caregiver burden.  
39  
40 Previous study from Ireland, Turkey, Korea, Japan and France had reported significant caregiver burden of informal  
41 caregivers of PWD and the caregiver burden was associated with age of PWD, level of cognitive function,  
42 neuropsychiatric symptoms, frontal lobe dysfunction, antidepressant drugs and ADLs<sup>Error! Reference source not found.</sup>.

1 Previous studies also have been explored in northern cities in China<sup>9</sup>. However, the level and related factors of  
2 caregiver burden of PWD in communities of China was not consistent. This study aimed to explore the level and  
3 related factors of caregiver burden of PWD who were resident in communities in Shanghai.  
4

5  
6 Depression of caregivers was significantly associated with higher level of caregiver burden among caregivers of  
7 PWD s<sup>10</sup>. Social support refers individual or collective resources that can provide emotional and mental assistance  
8 according to Ross et al's study<sup>11</sup> Cohen and Thoits proposed and verified the buffering hypothesis in their study and  
9 confirmed that social support was a buffer against life stress and protect physical and mental health<sup>12,13</sup>. Greater social  
10 support can help people to cope with change in life better<sup>14</sup>. Ruisoto reported that social support and resilience were  
11 protective factors against caregiver burden among caregivers of PWDs<sup>15</sup>. Therefore, we tested the moderating effect of  
12 social support on caregiver burden and depression of caregivers.  
13  
14  
15  
16  
17  
18  
19  
20

21 In China, most old persons living with dementia live in communities and depend on their family members'  
22 caregiving. China pilot long-term care (LTC) insurance policy has been implemented in 15 cities in 2016. However,  
23 the supply and demand of LTC services are unmatched and unbalanced<sup>16</sup>. Formal care service is difficult to access at  
24 home and support to family caregivers of PWDs is limited in most area in China<sup>17</sup>, which is not enough to reduce the  
25 caregiver burden. Furthermore, due to different socio-cultural background, a cultural sense of caregiving obligation  
26 may lead to different level of burden felt by caregivers<sup>18</sup>. Besides, the caregivers were experiencing sense of stigma in  
27 China<sup>19</sup>. Therefore, we conducted this study to explore the level and related factors of caregiver' burden of PWDs in  
28 Chinese communities, to provide healthcare professionals useful information of reducing caregiver burden.  
29  
30  
31  
32  
33  
34  
35  
36

## 37 **PARTICIPANTS AND METHODS**

### 38 **Participants**

39  
40 This was a cross-sectional study conducted from March 2017 to March, 2018. A total of 8800 old adults aged  
41 over 60 were selected randomly from seven community healthcare centers in Hongkou District, Shanghai, China. The  
42 healthcare providers in community centers screened 8549 old adults' cognitive function used self-rating scale  
43 Alzheimer's disease-8 (AD8), which score  $\geq 2$  meant cognitive impairment . A total of 2272 old adults with AD8  $\geq 2$ .  
44 Among these 2272 old adults, 500 old adults were selected randomly to receive Mini-Mental State Examination  
45 (MMSE). A total of 456 old adults with cognitive impairment(MMSE < 26 ). Then these older adults and their  
46 primary family caregivers were invited to the Neurology Clinic of Changzheng Hospital affiliated to Navy Medical  
47 University for further comprehensive neuropsychological assessment by neurologists. The primary family caregivers  
48 were defined as an unpaid family member who took care of the persons most of the time with greatest responsibility  
49 for their care and know the condition and environment mostly<sup>20</sup>. A total of 116 old adults were diagnosed with  
50  
51  
52  
53  
54  
55  
56  
57  
58  
59  
60

dementia according to the National Institute of Aging-Alzheimer's Association (NIA-AA) criteria in the Neurology Clinic after the clinical examination and neuropsychological assessment. The exclusion criteria of PWDs included: (1) visual and auditory impairment (2) severe aphasia, (3) the acute stage of chronic disease, (4) unable to be seated for more than 40minutes, (5) the presence of other nervous system diseases. Seven dyads of PWDs and their primary family caregivers refused the study. There were 109 dyads of PWDs and their primary family caregivers were recruited in the study finally. The study was approved by the ethics committees of Changzheng Hospital, and all the participants signed the informed consent.

### **Patients and Public Involvement**

Patients and the public were not involved in this study, including the recruitment, data collection, analysis, interpretation and dissemination of the results.

### **Variables**

#### **Outcome Variable**

The caregiver burden of the caregivers was measured by the Caregiver Burden Inventory (CBI). It was developed by Novak in 1989 to measure the caregivers burden of PWDs and was widely used in disabled stroke patients, spinal cord injuries, chronic-acquired brain injury, and neurologic Wilson disease in previous studies<sup>21</sup>. CBI including five domains including time-dependence burden (20 points), development burden(20 points), physical burden (16 points), social burden(16 points), and emotional burden(20 points). The total score of CBI was 96. The higher score means the heavier caregiver burden. Chou tested the reliability and validity of the Chinese version of CBI, which showed adequate internal consistency reliability, appropriate content validity and concurrent validity<sup>22</sup>. The score of CBI > 36 indicated that the caregivers' "risk of burning out"<sup>23</sup>.

#### **Independent Variables**

##### *Caregivers' Variables*

The socio-demographic characteristics included age, gender, education, employment, and relationship with dementia patients.

The caregivers' depression was measured by the Self-rating Depression Scale (SDS) which was developed by Zung in 1965 to measure the level of depression of adults<sup>24</sup>. We used a simplified Chinese version which including 12 items, the version has been used in the previous study<sup>25</sup>.

The community service utilization was measured by the Community Service Utilization Measurement. The measurement included 10 items: nursing assistant, housekeeper, doctor, psychologist, day care center, food delivered, ambulance, hospitalization, nursing home and other services. Each item had two options: used or not, the 10 items

1 were developed according to the existing services in communities of Shanghai. The measurement has been used in the  
2 previous study<sup>25</sup>.

3  
4 The social support perceived by the caregivers was measured by three questions: (1) How many people can be  
5 relied on when the situation is urgent; (2) How do people care about the recent situations; (3) How easy help from  
6 neighbor or colleagues can be reached when needed. Sum score range from 3 to 14, with higher scores indicating a  
7 stronger social support. The measurement has been used in the previous study<sup>25</sup>.

8  
9 The positive aspects of caregivers were measured by Positive Aspects of Caregiving (PAC). The scale was  
10 developed by the Tarlow to evaluate the positive aspects of the caregiving in 2004 and was translated and tested by  
11 Zhang, the Cronbach's  $\alpha$  coefficient of PAC and two domains were 0.89, 0.86, 0.80, respectively<sup>26</sup>. The scale is a  
12 self-rating scale which included nine items with two domains: self-affirmation and outlook on life. The items used a 5-  
13 point Likert-type scale. The higher score indicated more positive aspects of caregiving. The content validity and  
14 structure validity of the scale were acceptable<sup>26</sup>.

#### 15 *Participants variables*

16 The socio-demographic characteristics included age, gender and education. The disease characteristics included  
17 types of dementia (Alzheimer's disease (AD), vascular dementia, frontotemporal dementia, mixed dementia, and  
18 dementia with Lewy bodies), cognitive function, subjective sleep quality, the behavioral and psychological  
19 symptoms, and activities of daily living.

20 The cognitive function of the dementia patients was assessed by MoCA. MoCA was developed by Nasreddine in  
21 Canada in 2004. It included 8 domains of cognitive function: attention, executive function, memory, language, visual  
22 spatial, abstract thinking, calculation, and orientation. MoCA score ranged from 0 to 30, with lower score indicating  
23 poorer cognition. MoCA has been widely used in the assessment of cognitive function among patients with stroke,  
24 Parkinson's disease and other diseases. It had stable sensitivity and specificity. MoCA has been translated into 30  
25 different versions. Wang translated the MoCA-Beijing version and the assessment can be available from  
26 [www.mocatest.org](http://www.mocatest.org). Chen tested the reliability and validity of the MoCA-BJ in people with obstructive sleep apnea  
27 hypopnea syndrome, the Cronbach's  $\alpha$  of the MoCA-BJ was 0.73<sup>27</sup>.

28 The sleep quality of the dementia patients was assessed by the Pittsburgh Sleep Quality Index (PSQI), the index  
29 was answered by the PWDs and their caregivers. PSQI was developed by Buysse in 1989 and was translated by Liu<sup>28</sup>.  
30 The sensitivity and specificity of Chinese version of PSQI were 98.3% and 90.3%<sup>28</sup>. The PSQI is a self-report  
31 questionnaire that assess seven dimensions of sleep over a one-month time period. The seven dimensions included  
32 subject sleep quality, sleep latency, sleep duration, habitual sleep efficiency, sleep disturbances, use of sleeping  
33



1 medicine and daytime dysfunction. PSQI score ranged from 0 to 21 with higher scores representing poorer subjective  
2 sleep quality<sup>28</sup>.

3  
4 The abilities of daily life was assessed by the Activities of daily living Scale (ADL), the scale was answered by  
5 the caregivers of PWDs. The scale was modified by Mingyuan Zhang<sup>29</sup>. It included 20 items with stable reliability and  
6 validity<sup>29</sup>. Each item score ranged from 1 (completely independent ) to 4 (completely dependent ). The total score  
7 ranged from 20 to 80, with lower score indicating higher level of ADL.  
8

9  
10 The behavioral and psychological symptoms of dementia patients was assessed by the Neuropsychiatric  
11 Inventory (NPI), the inventory was answered by the caregivers of the PWDs. The inventory was used to evaluate the  
12 severity and frequency of 10 common abnormal behaviors in dementia patients<sup>29</sup>. Tao translated the inventory and  
13 tested the reliability and validity of the Chinese version among patients with Alzheimer's disease. The Chinese  
14 version of NPI was a reliable and valid tool for measuring neuropsychiatric disturbances in patients with AD<sup>29</sup>.  
15

## 16 **DATA ANALYSIS**

17 Descriptive statistics were used to summarize socio-demographic status and clinical characteristics.  
18 Characteristics of participants were reported as mean and standard deviation (SD) for continuous variables and as  
19 numbers and proportion for categorical variables. The univariate linear regression was run to test the association  
20 between demographic, PWDs' disease-related, and caregivers' caregiving-related variables and caregiver burden.  
21 Then only the statistically significant variables were entered into the multivariate linear regression. Categorical  
22 variables were transferred to dummy variables. The coding of the variables was shown in Table 1. The Statistical  
23 package for social science (SPSS) 26.0 was used to analysis the data. The statistically significant value was set as  $p <$   
24  $0.05$ .  
25

26 Multiple regression analysis was performed to examine the moderating effect of social support on the  
27 relationship between caregiver burden and caregivers' depression. Caregiver burden was regressed on social support  
28 and caregiver's depression.  
29

## 30 **RESULT**

31 In total, 109 dyads of PWDS and their caregivers were recruited in the study. Of these PWDs, 37(33.3%) were  
32 diagnosed with AD, 15(13.5%) with frontotemporal dementia, 22(19.8%) with mixed dementia, 12(10.8%) with Lewy  
33 bodies-associated dementia, and 23(20.7%) with vascular dementia. The average age of the PWDs was  $76.02 \pm 8.78$ .  
34 The percentage of female was 57.8%. Among 109 PWDs, 83 (76.1%) with high school education or above, 12(11.0%)  
35 middle school, 7(6.4%) primary school, and 7(6.4%) illiteracy. The average MoCA was  $12.50 \pm 5.84$ . The average  
36  
37  
38  
39  
40  
41  
42  
43  
44  
45  
46  
47  
48  
49  
50  
51  
52  
53  
54  
55  
56  
57  
58  
59  
60

1 PSQI was  $5.57 \pm 5.00$ . Eighty (72.1%) patients had poor sleep quality. Socio-demographic and disease characteristics  
2 of the dementia patients are shown in Table 2.  
3

4 The mean age of the caregivers was  $65.18 \pm 12.03$ . The percentage of female were 57.8%. Among the 109  
5 caregivers, 66 (50.6%) were spouses and 42 (36.7%) were children. 86 (77.0%) caregivers had taken care of the  
6 PWDs for one to four years. 53 (47.7%) caregivers spent 21 to 40 hours per week on caregiving. The mean score of  
7 CBI was  $65.92 \pm 16.74$ , which indicated a high level of caregiver burden. The average score of five domains of CBI  
8 were shown in Figure 1. The socio-demographic characteristics of the caregivers and caregiver burden was shown in  
9 Table 3.  
10  
11  
12  
13  
14  
15

16 Table 4 presents the results from univariate and multivariate linear regression. Age of PWDs, MoCA, PAC,  
17 community service needs, and social support were significantly associated with caregiver burden. MoCA, PAC and  
18 social support of caregivers were negatively associated with caregiver burden ( $\beta = -0.84$ ,  $p < 0.001$ ,  $\beta = -3.61$ ,  $p = 0.03$ ,  
19  $\beta = -1.22$ ,  $p = 0.001$ , respectively), which indicated better PWDs' cognitive function, more PAC and higher level of  
20 social support were related to less caregiver burden. The community service needs were positively associated with  
21 caregivers burden ( $\beta = 3.46$ ,  $p < 0.001$ ), which indicated more community service needs were related to more  
22 caregiver burden.  
23  
24  
25  
26  
27  
28  
29  
30

31 The moderation effect of social support on the relationship between caregiver burden and caregivers' depression  
32 was tested. Social support independently contributed to caregivers' depression. Specifically, higher level of caregiver  
33 burden displayed high level of depression ( $b = 0.1235$ ,  $p < 0.001$ ). Moreover, the two-way interaction between social  
34 support and caregiver burden significantly contributed to caregivers' depression (unstandardized  $B = -0.027$ ,  $p =$   
35  $0.011$ ), as reflected in Figure 2.  
36  
37  
38  
39  
40

## 41 DISCUSSION

42 This was a cross-sectional study to explore the level and related factors of caregiver burden of PWDs in  
43 communities of Shanghai. The level of caregiver burden was relatively high. After multivariate analyses, PWDs'  
44 cognitive function (MoCA), PAC, social support and community service needs were significantly associated with  
45 caregiver burden. The social support had a moderate effect on the relationship between caregiver burden and  
46 caregivers' depression.  
47  
48  
49  
50  
51

52 The level of caregiver burden ( $65.92 \pm 16.74$ ) was relatively higher than those reported in previous studies<sup>23,30</sup>.  
53 *TORRISI et al* and *Iavarone et al* reported that the average CBI scores of dementia patients' caregivers and  
54 Alzheimer's Disease patients' caregivers by convenient sampling in Italy were  $31.9 \pm 19.5$  and  $37.05 \pm 20.37$ ,  
55 respectively<sup>23,30</sup>.  
56  
57  
58  
59  
60

1 Firstly, present study has shown that worse cognitive function of PWDs and older age of PWDs was related to  
2 more caregiver burden, which was consistent with previous study<sup>20,30</sup>. Dementia always accompanies with  
3 neuropsychiatric behaviors and decreased ADL<sup>31</sup>. With progressing of disease, dementia patients' dependence on the  
4 caregivers keeping getting serious. The participants were with moderate to severe cognitive function impairment in  
5 our study and the age of the caregivers( $65.18 \pm 12.03$ ) in our study is older than previous studies( $57.5 \pm 12.3$ )<sup>30</sup>.

11 Secondly, The differences of caregiver burden from similar samples between previous studies and present study  
12 may be due to different social environments, cultures, healthcare policies, ethnicity and age of caregivers<sup>33, 16, Error!</sup>  
13 **Reference source not found.** Caregiver burden was defined as “a multidimensional response to physical, psychological,  
14 emotional, social, and financial stressors associated with the caregiving experience”<sup>32</sup>. Caregiver burden derived from  
15 the perceived stressors which was influenced by many psychosocial factors like social environment and culture<sup>33</sup>. A  
16 cultural sense of caregiving obligation may overlap the distress and burden felt by the caregivers<sup>18</sup>. Among Chinese  
17 cultures, a greater sense of responsibility to care for elderly family members and a reluctance to discuss family  
18 problems leads to less social and emotional support for caregivers<sup>34</sup>.

27 Thirdly, although Long-term care insurance policy has been introduced since 2016 in 15 cities of China, many  
28 PWDs were not included in the LTC insurance policy in the pilot phase in China<sup>17</sup>. The participants in our study who  
29 were from Hongkou District were not covered during the interviewing period of Shanghai. Informal care from family  
30 members is primary source of care for dementia patients in China. However, as a result of the rapid socioeconomic  
31 shifts and changing demographic structure, reliance on the care provided by family has become untenable<sup>16</sup>. The  
32 formal care in most high-income countries were gradually evolved into home-and community- based care<sup>16</sup>. All the  
33 situation may cause more caregiver burden in our study compare to other countries.

41 Previous studies also reported that the PAC was associated with the higher level of caregiver burden<sup>35</sup>. The  
42 positive aspects of caregiving were generally interpreted as the satisfaction and reward stemming from the caregiving  
43 relationship<sup>36</sup>. PAC was associated with higher level of well-being and better health condition of caregiver<sup>36</sup>.  
44 Furthermore, PAC can help caregivers coping with challenges associated with role of caregivers<sup>36</sup>. Therefore, higher  
45 level of PAC was associated with lower level of caregiver burden.

51 Present study has shown that more community service needs were associated with higher level of caregiver  
52 burden. Previous study has reported that dementia cause social stigma to dementia caregivers in China and stigma  
53 were associated with caregiver burden significantly<sup>19,37</sup>. Utilization of community service may make caregivers  
54 experience more stigmatic feelings from their neighbors, friends or colleagues and further increase the level of  
55 caregiver burden. Furthermore, previous study reported that informal dementia patients' caregivers seldom used

1 respite services<sup>37</sup>. The gap between needs of supportive community service among dementia patients' caregivers and  
2 provision of community service in real environment is supposed to be explored in the future study.  
3

4 This study found that caregiver burden with low level social support had stronger effect on depression of  
5 caregivers compared to those with high level social support. Caregiver burden and depression were complex clinical  
6 and social problems<sup>38</sup>. Depression of caregivers was associated with stress from providing care, social isolation,  
7 limited money, and decreased leisure time<sup>39</sup>. Previous study reported that higher level of social support was associated  
8 with lower level of caregiver burden<sup>40</sup>. In our study, caregivers of dementia patients perceived social support from  
9 family members, relatives, neighbors, and colleagues. Previous study reported that emotional support in the form of  
10 reassurance from supporters was important in reducing depressive symptoms<sup>41</sup>. Secondly, social support positively  
11 influenced resilience, especially caregivers with high family support had the highest probability of elevated  
12 resilience<sup>42</sup>. Besides, our study tested the support of actual caregiving, effective sharing on caregiving can reduce the  
13 caregiver burden of caregivers in some way<sup>41</sup>. Therefore, strengthening social support for caregivers can buffer the  
14 negative effects of depression on the caregiver burden and reduce the depression of caregivers.  
15

16 The present results showed that the caregiver burden of PWDs was relatively high and it was related to both  
17 patients' and caregivers' factors. Some of the factors were unmodifiable such as dementia patients' cognitive function.  
18 However, depression symptom of caregivers, social support and community service were modifiable. The  
19 communities can provide more convenient and supportive services for caregivers of dementia patients to relieve  
20 caregiver burden. According to China pilot long-term care (LTC) insurance policy, the level of disability of old adults  
21 were assessed to decide whether the old adult accord with the criterion of long-term care insurance. However, the  
22 assessment in European countries and American were more in-depth and comprehensive, and more detailed regarding  
23 the specific diseases such as dementia<sup>44,45</sup>. The assessment is supposed to be further refined in the future. Chinese  
24 government is now continuously improving the policy of the LTC insurance and the covering area is extending to  
25 more cities. LTC insurance can provide more specific services that are urgently needed by PWDs and caregivers in  
26 home care to alleviate the depression of caregivers and reduce caregiver burden. LTC insurance may also effectively  
27 reduce financial burden of PWDs in the future<sup>43</sup>.  
28

## 53 CONCLUSION

54 This study highlighted the growing issues of dementia and the heavy burden from which family caregivers were  
55 suffering in Shanghai and explored the associated factors with caregiver burden. The result suggests that caregiver  
56 burden is at a relatively high level and it was associated with dementia patients' cognitive function (MoCA),  
57  
58  
59

caregivers' depressive symptoms, perceived social support and community service utilization. Providing more social support and community service and relieving depressive symptoms of caregivers may help to reduce the caregiver burden.

### **ETHICS STATEMENT**

The studies involving human participants were reviewed and approved by Institutional Review Board (IRB) of Changzheng Hospital, Second Military Medical University. The patients/participants provided their written informed consent of participating. The IRB approval number was 2019SL026.

### **CONFLICT OF INTEREST**

Authors have no conflict of interest to declare.

### **FUNDING**

This work was supported by Science and Technology Support Projects in Biomedicine Field of Shanghai Science and Technology Commission (#19441907500); Medical Innovation Projects of Second Military Medical University military (#2017JS07); Science and Technology Action Innovation program by Science and Technology Commission of Shanghai (#17411950104); Characteristic Services of Veteran Cadres Memory Disorders Diagnosis and Treatment in Changzheng hospital (2020CZWJFW12); Shanghai Pujiang Program(#18PJC115) and Naval Medical University Nursing Discipline Talent Training Program (18QPBJ06).

### **ACKNOWLEDGMENTS**

We thank Dr. Yan Zhang for her contribution in data collection.

### **CONTRIBUTORSHIP STATEMENT**

Zhijian Liu designed concept, analyzed data, interpreted data and prepared manuscript.

Wenjing Sun designed concept, analyzed data, interpreted data and prepared manuscript.

Honglin Chen designed concept, analyzed data, interpreted data and prepared manuscript.

Jianhua Zhuang interpreted outcome and reviewed manuscript.

Bei Wu, interpreted outcome and reviewed manuscript.

Hanzhang Xu, interpreted outcome and reviewed manuscript.

Peng Li, collected the data.

Xiaohan Chen, collected the data.

You Yin, designed concept, interpreted outcome and reviewed manuscript.

Juan Li, designed concept, interpreted outcome and reviewed manuscript

All authors have read and approved the submission, and ensure that this is the case.

## DATA AVAILABILITY STATEMENT

Data are available upon reasonable request.

## REFERENCES

1. World Health Organization. (2015). World report on aging and health.
2. Prince, M. , Bryce, R. , Albanese, E. , Wimo, A. , Ribeiro, W. , & Ferri, C. P. . (2013). The global prevalence of dementia: a systematic review and metaanalysis. *Alzheimer's & Dementia*, 9(1), 63-75.e2.
3. United Nations Department of Economic and Social Affairs Population Division. World population ageing, 2017.
4. Ding, D. , Zhao, Q. , Guo, Q. , Meng, H. , Wang, B. , & Yu, P. Luo, J., Zhou, Y. , Yu, L. , Zheng, L. . (2014). The shanghai aging study: study design, baseline characteristics, and prevalence of dementia. *Neuroepidemiology*, 43(2), 114-122. <http://doi.org/10.1159/000366163>.
5. American Psychiatric Association. (2000). Diagnostic and statistical manual of mental disorders, Fourth Edition: DSM-IV-TR®. Washington DC: American Psychiatric Pub.
6. Zarit, S. H. , Todd, P. A. , Zarit, J. M. . (1986). Subjective burden of husbands and wives as caregivers: a longitudinal study. *Gerontologist*, 26(3), 260-266. <http://doi.org/10.1093/geront/26.3.260>.
7. Bertrand, R., M. . (2006). Are all caregivers created equal? stress in caregivers to adults with and without dementia. *Journal of Aging & Health*, 18(4), 534. <http://doi.org/10.1177/0898264306289620>.
8. Chiao, C. Y. , Wu, H. S. , & Hsiao, C. Y. . (2015). Caregiver burden for informal caregivers of patients with dementia: a systematic review. *International Nursing Review*, 62(3), 340–350. <http://doi.org/10.1111/inr.12194>.
9. Liu, S. , Li, C. , Shi, Z. , Wang, X. , Zhou, Y. , Liu, S. , Liu, J. , Yu, T. , Ji, Y.(2016). Caregiver burden and prevalence of depression, anxiety and sleep disturbances in alzheimer's disease caregivers in china. *Journal of Clinical Nursing*. <http://doi.org/10.1111/jocn.13601>.
10. Rosas-Carrasco Óscar., Guerra-Silla María de Guadalupe., Torres-Arreola Laura Del Pilar., García-Peña Carmen., Escamilla-Jiménez Cristopher Isaac., González-González César. (2014). Caregiver burden of Mexican dementia patients: the role of dysexecutive syndrome, sleep disorders, schooling and caregiver depression. *Geriatr Gerontol Int*, 14(1), 146-52. <http://doi.org/10.1111/ggi.12072>.
11. Ross, E. . (2004). Psychosocial approaches to health, illness and disability: A reader for health care professionals.
12. Cohen, S. , McKay, G. . (1984). Social support, stress, and the buffering hypothesis: A theoretical analysis. Hillsdale.

- 1 13. Thoits, P. A. . (1982). Conceptual, methodological, and theoretical problems in studying social support as a buffer  
2 against life stress. *J Health Soc Behav*, 23(2), 145-159. <http://doi.org/10.2307/2136511>.
- 3  
4 14. Ho, B. , Friedland, J. , Rappolt, S. , Noh, S. . (2003). Caregiving for relatives with alzheimer's disease: feelings of  
5 chinese-canadian women. *Journal of Aging Studies*, 17(3), 301-321.  
6  
7 [http://doi.org/10.1016/S0890-4065\(03\)00028-8](http://doi.org/10.1016/S0890-4065(03)00028-8).
- 8  
9 15. Ruisoto, P. , Contador, I. , Fernández-Calvo, B. , Serra, L. , Jenaro, C. , Flores, N. , Ramos, F. , Rivera-Navarro,  
10 J. . (2020). Mediating effect of social support on the relationship between resilience and burden in caregivers of  
11 people with dementia-sciencedirect. *Archives of Gerontology and Geriatrics*, 86, 103952-103952.  
12  
13 <http://doi.org/10.1016/j.archger.2019.103952>.
- 14  
15 16. Du, P. , Dong, T. , Ji, J. . (2020). Current status of the long-term care security system for older adults in China.  
16  
17 *Research on Aging*, 43(3), 016402752094911. <http://doi.org/10.1177/0164027520949117>.
- 18  
19 17. Feng, J. , Wang, Z. , Yu, Y. . (2020). Does long-term care insurance reduce hospital utilization and medical  
20 expenditures? evidence from china. *Social Science & Medicine*, 258, 113081.  
21  
22 <http://doi.org/10.1016/j.socscimed.2020.113081>.
- 23  
24 18. Brando, D. , Ribeiro, O. , Oliveira, M. , & Constana Paúl. (2017). Caring for a centenarian parent: an exploratory  
25 study on role strains and psychological distress. *Scandinavian Journal of Caring Sciences*, 31(4).  
26  
27 <http://doi.org/10.1111/scs.12423>.
- 28  
29 19. Zhang, X. , Clarke, C. L. , Rhynas, S. J. . (2019). Tensions in dementia care in China: an interpretative  
30 phenomenological study from shandong province. *International Journal of Older People Nursing*, 15(3)..  
31  
32 <http://doi.org/10.1111/opn.12291>.
- 33  
34 20. Freek, G. , Judith, B. , Myrra, V. D. , Bernard, V. , Philip, S. , Van, P. J. ,Joling, K. J. , Mary, M. , Van, W. J. .  
35 (2008). (cost)-effectiveness of family meetings on indicated prevention of anxiety and depressive symptoms and  
36 disorders of primary family caregivers of patients with dementia: design of a randomized controlled trial. *BMC*  
37 *Geriatrics*, 8. <http://doi.org/10.1186/1471-2318-8-2>.
- 38  
39 21. Novak, M. , Guest, C. . (1989). Application of a multidimensional caregiver burden inventory. *Gerontologist*,  
40 29(6), 798-803. <http://doi.org/10.1093/geront/29.6.798>
- 41  
42 22. Chou, K. R. , Jiann-Chyun, L. , Chu, H. . (2002). The reliability and validity of the chinese version of the  
43 caregiver burden inventory. *Nursing Research*, 51(5), 324. <http://doi.org/10.1097/00006199-200209000-00009>.
- 44  
45  
46  
47  
48  
49  
50  
51  
52  
53  
54  
55  
56  
57  
58  
59  
60

- 1 23. Torrisi, M. , Cola, M. , Marra, A. , Luca, R. D. , RS Calabrò. (2017). Neuropsychiatric symptoms in dementia may  
2 predict caregiver burden: a sicilian exploratory study. *Psychogeriatrics*, 17(2), 103-107.  
3  
4 <http://doi.org/10.1111/psyg.12197>.
- 5  
6 24. ZUNG, William, W. K. . (1965). A self-rating depression scale. *Archives of General Psychiatry*, 12(1), 63.  
7  
8 <http://doi.org/10.1001/archpsyc.1965.01720310065008>.
- 9  
10 25. Chen, H. , Chi, I. , Liu, R. . (2018). Hospital utilization among Chinese older adults: patterns and predictors.  
11  
12 *Journal of Aging and Health*, 31, 089826431878054. <http://doi.org/10.1177/0898264318780546>.
- 13  
14 26. Zhang, R. . (2007). Reliability and validity of Chinese version of positive aspects of caregiving. *Chinese Journal*  
15  
16 *of Nursing*.
- 17  
18 27. Chen X. , Zhang R. , Xiao Y. , Dong J. , Niu X. , Kong W. (2015). Reliability and Validity of the Beijing Version  
19  
20 of the Montreal Cognitive Assessment in the Evaluation of Cognitive Function of Adult Patients with OSAHS.  
21  
22 *PLoS One*, 10(7), e0132361. <http://doi.org/10.1371/journal.pone.0132361>.
- 23  
24 28. Liu, X. C. , Tang, M. Q. Hu, L., Wang, A. Z. ,Wu, H. X. , Zhao, G. F. , Gao, C. N. , Li, W. S. . (1996). Reliability  
25  
26 and validity of the Pittsburgh sleep quality index. *Chinese Journal of Psychiatry*, 29(2), 29103-29107.
- 27  
28 29. Guo Q, Hong Z. (2016). *Neuropsychological Assessment*. 2nd Ed. Shanghai: Shanghai science and technology  
29  
30 press.
- 31  
32 30. Iavarone, A. , Ziello, A. R. , Pastore, F. , Fasanaro, A. M. , Poderico, C. . (2014). Caregiver burden and coping  
33  
34 strategies in caregivers of patients with Alzheimer's disease. *Neuropsychiatric Disease & Treatment*,  
35  
36 2014(default), 1407. <http://doi.org/10.2147/NDT.S58063>.
- 37  
38 31. Saari, T. , Hallikainen, I. , Hintsala, T. , Koivisto, A. M. . (2019). Neuropsychiatric symptoms and activities of daily  
39  
40 living in Alzheimer's disease: ALSOVA 5-year follow-up study. *International Psychogeriatrics*.  
41  
42 <http://doi.org/10.1017/S1041610219001571>.
- 43  
44 32. Kasuya, R. T. , Polgar-Bailey, P. , Takeuchi, R. . (2001). Caregiver burden and burnout: a guide for primary care  
45  
46 physicians. *Postgraduate Medicine*, 108(7), 119-123. <http://doi.org/10.3810/pgm.2000.12.1324>.
- 47  
48 33. Eters, L. , Goodall, D. , & Harrison, B. E. . (2010). Caregiver burden among dementia patient caregivers: a  
49  
50 review of the literature. *Journal of the American Association of Nurse Practitioners*, 20(8), 423-428.  
51  
52 <http://doi.org/10.1111/j.1745-7599.2008.00342.x>.
- 53  
54 34. Torti, F. M. , Gwyther, L. P. , Reed, S. D. , Friedman, J. Y. , Schulman, K. A. . (2004). A multinational review of  
55  
56 recent trends and reports in dementia caregiver burden. *Alzheimer Dis Assoc Disord*, 18(2), 99-109.  
57  
58 <http://doi.org/10.1097/01.wad.0000126902.37908.b2>.
- 59  
60



- 1 35. Xue, H. , Zhai, J. , He, R. , Zhou, L. , Liang, R. , Yu, H. . (2018). Moderating role of positive aspects of  
2 caregiving in the relationship between depression in persons with Alzheimer's disease and caregiver burden.  
3  
4 Psychiatry Research, 261, 400. <http://doi.org/10.1016/j.psychres.2017.12.088>.  
5  
6
- 7 36. Tarlow, B. J. , Wisniewski, S. R. , Belle, S. H. , Rubert, M. , Gallagher-Thompson, D. . (2004). Positive aspects of  
8 caregiving: contributions of the reach project to the development of new measures for alzheimer's caregiving.  
9  
10 Research on Aging, 26(4), 429-453. <http://doi.org/10.1177/0164027504264493>.  
11  
12
- 13 37. Su, J. A. , Chang, C. C. . (2020). Association between family caregiver burden and affiliate stigma in the families  
14 of people with dementia. International Journal of Environmental Research and Public Health, 17(8).  
15  
16 <http://doi.org/10.3390/ijerph17082772>.  
17  
18
- 19 38. Springate, B. , Tremont, G. . (2013). Caregiver burden and depression in mild cognitive impairment. Journal of  
20 Applied Gerontology, 32(6), 765-775. <http://doi.org/10.1177/0733464811433486>.  
21  
22
- 23 39. Simpson, C. , Carter, P. . (2013). Dementia behavioral and psychiatric symptoms: effect on caregiver's sleep.  
24 Journal of Clinical Nursing, 22(21-22). <http://doi.org/10.1111/jocn.12127>.  
25  
26
- 27 40. Xian, M. , Xu, L. . (2019). Social support and self-rated health among caregivers of people with dementia: the  
28 mediating role of caregiving burden. Dementia (2), 147130121983746.  
29  
30 <http://doi.org/10.1177/1471301219837464>.  
31  
32
- 33 41. Huang, C. Y. , Musil, C. M. , Zauszniewski, J. A. , Wykle, M. L. . (2006). Effects of social support and coping of  
34 family caregivers of older adults with dementia in Taiwan. Int J Aging Hum Dev, 63(1), 1-25.  
35  
36 <http://doi.org/10.2190/72JU-ABQA-6L6F-G98Q>.  
37  
38
- 39 42. Cohen, S. , Mckay, G. . (1984). Social support, stress, and the buffering hypothesis: A theoretical analysis.  
40 Hillsdale.  
41  
42
- 43 43. Chen, L. , Zhang, X. , Xu, X. . (2020). Health insurance and long-term care services for the disabled elderly in  
44 China: based on CHARLS data. Risk Management and Healthcare Policy, Volume 13, 155-162.  
45  
46 <http://doi.org/10.2147/RMHP.S233949>.  
47  
48
- 49 44. Shanghai Municipal Government. (2016). Shanghai's pilot Measures for long-term care Insurance.  
50  
51
- 52 45. Zeng, Q. , Wang, Q. , Zhang, L. , Xu, X. . (2020). Comparison of the measurement of long-term care costs  
53 between China and other countries: a systematic review of the last decade. Healthcare, 8(2), 117.  
54  
55 <http://doi.org/10.3390/healthcare8020117>.  
56  
57  
58  
59

60 Table1: The list of the associated variables

| Associated variables              | Variables                     |                      | Coding                                                                                                     |                                    |
|-----------------------------------|-------------------------------|----------------------|------------------------------------------------------------------------------------------------------------|------------------------------------|
| Socio-demographic characteristics | Age                           | Continuous variable  |                                                                                                            |                                    |
|                                   | Gender                        | Categorical variable | Male=1, female=0                                                                                           |                                    |
|                                   | Education level               | Categorical variable | Illiteracy=1<br>Primary school=2<br>Middle school=3<br>High school or above=4                              |                                    |
|                                   | Status of work                | Categorical variable |                                                                                                            |                                    |
|                                   | Relationship                  | Categorical variable | Spouse=1<br>Children=2<br>Relatives=3                                                                      |                                    |
|                                   | Characteristics of disease    | Type of dementia     | Categorical variable                                                                                       | AD=1, FTD=2, MD=3,<br>Lewy=4, VD=5 |
|                                   |                               | MoCA                 | Continuous variable                                                                                        |                                    |
|                                   |                               | PISQ                 | Continuous variable                                                                                        |                                    |
|                                   |                               | NPI                  | Continuous variable                                                                                        |                                    |
|                                   |                               | ADL                  | Continuous variable                                                                                        |                                    |
| Characteristics of caregivers     | Caregiving years              | Categorical variable | No caring=1<br><0.5years=2<br>0.5years-1year=3<br>1years-4years=4<br>5years-9years=5<br>More than 9years=6 |                                    |
|                                   | Education                     |                      |                                                                                                            |                                    |
|                                   | Caring hours/week             | Categorical variable | 0hour-8hours=1<br>9hours-20hours =2<br>21hours-40hours =3<br>More than 40hours=4                           |                                    |
|                                   | Depressive symptoms           | Continuous variable  |                                                                                                            |                                    |
|                                   | Coping Style Questionnaire    | Continuous variable  |                                                                                                            |                                    |
|                                   | PAC                           | Continuous variable  |                                                                                                            |                                    |
|                                   | Social support                | Continuous variable  |                                                                                                            |                                    |
|                                   | Community Service Utilization | Continuous variable  | Used=1<br>Not used=0                                                                                       |                                    |

AD=Alzheimer's Disease ;FTD=frontotemporal dementia ;MD= mixed dementia ;Lewy= Lewy body associated; VD=vascular dementia; PAC=positive aspects of caregivers.

Table2: Social-demographic and disease characteristics of the dementia patients

| Characteristics                   |                 | Mean $\pm$ SD    | N(%)      |
|-----------------------------------|-----------------|------------------|-----------|
| Socio-demographic characteristics | Age(year)       | 76.02 $\pm$ 8.78 |           |
|                                   | Gender          |                  |           |
|                                   | <i>Female</i>   |                  | 63(57.8%) |
|                                   | Education level |                  |           |

|    |                         |                                    |             |
|----|-------------------------|------------------------------------|-------------|
| 1  |                         | <i>Below primary school</i>        | 14(12.8%)   |
| 2  |                         | <i>Middle school</i>               | 12(11.0%)   |
| 3  |                         | <i>High school or above</i>        | 83(76.1)    |
| 4  | Disease characteristics | Type of dementia                   |             |
| 5  |                         | <i>Alzheimer's</i>                 | 37(33.3%)   |
| 6  |                         | <i>Frontotemporal</i>              | 15(13.5%)   |
| 7  |                         | <i>Mixed</i>                       | 22(19.8%)   |
| 8  |                         | <i>Lewy bodies-associated</i>      | 12(10.8%)   |
| 9  |                         | <i>Vascular dementia</i>           | 23(20.7%)   |
| 10 |                         | MoCA total score                   | 12.50±5.84  |
| 11 |                         | NPI total symptom scale            | 21.50±14.94 |
| 12 |                         | <i>Caregiver distress subscale</i> | 0.28±0.45   |
| 13 |                         | <i>Delusion</i>                    | 1.5±2.77    |
| 14 |                         | <i>Hallucination</i>               | 1.3±2.99    |
| 15 |                         | <i>Agitation</i>                   | 1.22±2.17   |
| 16 |                         | <i>Depression</i>                  | 1.22±2.17   |
| 17 |                         | <i>Anxiety</i>                     | 2.18±2.81   |
| 18 |                         | <i>Euphoria</i>                    | 0.37±1.60   |
| 19 |                         | <i>Apathy</i>                      | 4.17±3.76   |
| 20 |                         | <i>Disinhibition</i>               | 0.28±0.87   |
| 21 |                         | <i>Irritability</i>                | 2.51±3.52   |
| 22 |                         | <i>Aberration</i>                  | 1.11±2.33   |
| 23 |                         | <i>Sleep</i>                       | 1.11±2.33   |
| 24 |                         | ADL total score                    | 42.94±14.17 |
| 25 |                         | Poor Sleep quality                 | 80(72.1%)   |
| 26 |                         | Score of PSQI                      | 5.57±5.00   |
| 27 |                         | <i>Subjective Sleep Quality</i>    | 0.85±1.02   |
| 28 |                         | <i>Sleep Latency</i>               | 1.23±2.01   |
| 29 |                         | <i>Sleep Duration</i>              | 0.58±0.83   |
| 30 |                         | <i>Habitual Sleep Efficiency</i>   | 0.64±1.00   |
| 31 |                         | <i>Sleep Disturbances</i>          | 0.64±1.00   |
| 32 |                         | <i>Use of Sleep Medications</i>    | 1.34±1.49   |
| 33 |                         | <i>Daytime Dysfunction</i>         | 1.34±1.49   |

NPI= the Neuropsychiatric Inventory; PSQI= Pittsburgh Sleep Quality Index; ADL=activities of daily life

Table3: Social-demographic characteristics and caregiver burden of caregivers

| Characteristics                | Mean ± SD   | n(%)      |
|--------------------------------|-------------|-----------|
| Age(year)                      | 65.18±12.03 |           |
| Gender                         |             |           |
| <i>Female</i>                  |             | 64(58.7%) |
| Education level                |             |           |
| <i>Below primary school or</i> |             | 12(11.0%) |

|    |                                     |               |
|----|-------------------------------------|---------------|
| 1  | Middle school                       | 12(11.0%)     |
| 2  | High school or above                | 85(78.0%)     |
| 3  | Relationship with dementia patients |               |
| 4  | Spouse                              | 66(59.5%)     |
| 5  | Children                            | 42(38.5%)     |
| 6  | Relatives                           | 3(2.7%)       |
| 7  | Caregiving hours/week(h)            |               |
| 8  | 20                                  | 12(10.8%)     |
| 9  | 21-40                               | 53(47.7%)     |
| 10 | 40                                  | 44(39.6%)     |
| 11 | Caregiving year (years)             |               |
| 12 | 1                                   | 12(11%)       |
| 13 | 1-5                                 | 86(77.5%)     |
| 14 | 5                                   | 11(10.1%)     |
| 15 | Score of SDS                        | 25.53 ± 3.84  |
| 16 | Positive Feeling of Caregivers      | 29.49 ± 3.86  |
| 17 | Coping strategy                     | 92.90 ± 5.78  |
| 18 | Social Support                      | 8.61 ± 1.32   |
| 19 | Community Service Utilization       | 2.46 ± 1.74   |
| 20 | Score of CBI                        | 65.92 ± 16.74 |
| 21 | Time-Dependence Burden              | 16.03 ± 5.59  |
| 22 | Development Burden                  | 13.72 ± 3.93  |
| 23 | Physical Burden                     | 9.79 ± 3.48   |
| 24 | Social Burden                       | 7.09 ± 3.07   |
| 25 | Emotional Burden                    | 10.28 ± 3.50  |

CBI=caregiver burden inventory; SDS= Self-rating Depression Scale

Table4: Linear regression of CBI

| Variables                   | Univariate analyses |       |      |        |       | Multivariate analyses |      |    |       |       |
|-----------------------------|---------------------|-------|------|--------|-------|-----------------------|------|----|-------|-------|
|                             | b                   | p     | SE   | 95%CI  |       | b                     | p    | SE | 95%CI |       |
|                             |                     |       |      | Lower  | Upper |                       |      |    | Lower | Upper |
| Age of patients             | 0.48                | 0.008 | 0.18 | 0.126  | 0.835 | 0.11                  | 0.19 |    |       |       |
| Gender of patients          | 0.41                | 0.90  | 3.26 | -6.06  | 6.87  |                       |      |    |       |       |
| Education level of patients |                     |       |      |        |       |                       |      |    |       |       |
| Primary school              | -10.43              | 0.25  | 9.00 | -28.28 | 7.42  |                       |      |    |       |       |
| Middle school               | -1.79               | 0.82  | 8.01 | -17.67 | 14.09 |                       |      |    |       |       |
| Highschool or above         | -4.60               | 0.49  | 6.63 | -17.74 | 8.54  |                       |      |    |       |       |

|    |                             |        |        |       |        |       |       |        |      |       |       |
|----|-----------------------------|--------|--------|-------|--------|-------|-------|--------|------|-------|-------|
| 1  | Type of dementia            |        |        |       |        |       |       |        |      |       |       |
| 2  |                             |        |        |       |        |       |       |        |      |       |       |
| 3  | <i>FTD</i>                  | -3.65  | 0.48   | 5.11  | -13.78 | 6.49  |       |        |      |       |       |
| 4  |                             |        |        |       |        |       |       |        |      |       |       |
| 5  | <i>MD</i>                   | 2.624  | 0.56   | 4.96  | -6.29  | 11.54 |       |        |      |       |       |
| 6  |                             |        |        |       |        |       |       |        |      |       |       |
| 7  | <i>Lewy</i>                 | -1.65  | 0.77   | 5.55  | -12.65 | 9.35  |       |        |      |       |       |
| 8  |                             |        |        |       |        |       |       |        |      |       |       |
| 9  | <i>VD</i>                   | 6.74   | 0.13   | 4.43  | -2.05  | 15.54 |       |        |      |       |       |
| 10 |                             |        |        |       |        |       |       |        |      |       |       |
| 11 | Score of MoCA               | -0.80  | 0.003  | 0.10  | -1.33  | -0.27 | -0.84 | <0.001 | 0.22 | -1.29 | -0.40 |
| 12 |                             |        |        |       |        |       |       |        |      |       |       |
| 13 | Total score of NPI          | 0.30   | 0.005  | 0.06  | 0.09   | 0.50  | 0.16  | 0.05   |      |       |       |
| 14 |                             |        |        |       |        |       |       |        |      |       |       |
| 15 | Score of ADL                | 0.41   | <0.001 | 0.11  | 0.20   | 0.63  | 0.14  | 0.13   |      |       |       |
| 16 |                             |        |        |       |        |       |       |        |      |       |       |
| 17 | Score of PSQI               | 0.33   | 0.60   | 0.001 | -0.304 | 0.973 |       |        |      |       |       |
| 18 |                             |        |        |       |        |       |       |        |      |       |       |
| 19 | Caregivers' age             | 0.14   | 0.30   | 0.32  | -0.13  | 0.40  |       |        |      |       |       |
| 20 |                             |        |        |       |        |       |       |        |      |       |       |
| 21 | Education level of          |        |        |       |        |       |       |        |      |       |       |
| 22 | caregivers                  |        |        |       |        |       |       |        |      |       |       |
| 23 |                             |        |        |       |        |       |       |        |      |       |       |
| 24 | <i>Primary school</i>       | 14.75  | 0.15   | 10.28 | -5.66  | 35.13 |       |        |      |       |       |
| 25 |                             |        |        |       |        |       |       |        |      |       |       |
| 26 | <i>Middle school</i>        | 5.75   | 0.55   | 9.69  | -13.46 | 24.96 |       |        |      |       |       |
| 27 |                             |        |        |       |        |       |       |        |      |       |       |
| 28 | <i>High school or above</i> | 7.31   | 0.40   | 8.59  | -9.71  | 24.34 |       |        |      |       |       |
| 29 |                             |        |        |       |        |       |       |        |      |       |       |
| 30 | Relationship                |        |        |       |        |       |       |        |      |       |       |
| 31 |                             |        |        |       |        |       |       |        |      |       |       |
| 32 | <i>Children</i>             | 3.71   | 0.27   | 3.31  | -2.85  | 10.26 |       |        |      |       |       |
| 33 |                             |        |        |       |        |       |       |        |      |       |       |
| 34 | <i>Relatives</i>            | -17.71 | 0.07   | 9.74  | -37.02 | 10.59 |       |        |      |       |       |
| 35 |                             |        |        |       |        |       |       |        |      |       |       |
| 36 | Caregiving time for each    |        |        |       |        |       |       |        |      |       |       |
| 37 | week                        |        |        |       |        |       |       |        |      |       |       |
| 38 |                             |        |        |       |        |       |       |        |      |       |       |
| 39 | <i>9-20</i>                 | -5.00  | 0.65   | 10.94 | -26.67 | 16.70 |       |        |      |       |       |
| 40 |                             |        |        |       |        |       |       |        |      |       |       |
| 41 | <i>21-40</i>                | -0.93  | 0.93   | 9.74  | -20.24 | 18.39 |       |        |      |       |       |
| 42 |                             |        |        |       |        |       |       |        |      |       |       |
| 43 | <i>40</i>                   | 6.89   | 0.48   | 9.80  | -12.54 | 26.31 |       |        |      |       |       |
| 44 |                             |        |        |       |        |       |       |        |      |       |       |
| 45 | caregiving years            |        |        |       |        |       |       |        |      |       |       |
| 46 |                             |        |        |       |        |       |       |        |      |       |       |
| 47 | <i>0.5</i>                  | -17.00 | 0.36   | 18.28 | -53.45 | 19.45 |       |        |      |       |       |
| 48 |                             |        |        |       |        |       |       |        |      |       |       |
| 49 | <i>0.5-1</i>                | -15.78 | 0.32   | 15.82 | -47.15 | 15.59 |       |        |      |       |       |
| 50 |                             |        |        |       |        |       |       |        |      |       |       |
| 51 | <i>1-4</i>                  | -12.44 | 0.41   | 15.09 | -42.37 | 17.49 |       |        |      |       |       |
| 52 |                             |        |        |       |        |       |       |        |      |       |       |
| 53 | <i>5-9</i>                  | 11.86  | 0.46   | 16.04 | -19.95 | 43.67 |       |        |      |       |       |
| 54 |                             |        |        |       |        |       |       |        |      |       |       |
| 55 | <i>9</i>                    | 16.00  | 0.34   | 16.78 | -17.27 | 49.27 |       |        |      |       |       |
| 56 |                             |        |        |       |        |       |       |        |      |       |       |
| 57 | PAC                         | -1.33  | 0.001  | 0.40  | -2.12  | -0.54 | -1.22 | 0.001  | 0.34 | -1.90 | -0.55 |
| 58 |                             |        |        |       |        |       |       |        |      |       |       |
| 59 | Coping strategy             | -0.25  | 0.38   | 0.28  | -0.80  | 0.31  |       |        |      |       |       |
| 60 |                             |        |        |       |        |       |       |        |      |       |       |

|   |                   |       |        |      |        |        |       |        |      |       |       |
|---|-------------------|-------|--------|------|--------|--------|-------|--------|------|-------|-------|
| 1 | Social Support    | -3.32 | 0.006  | 1.18 | -5.667 | -0.972 | -3.61 | <0.001 | 0.99 | -5.58 | -1.64 |
| 2 | Community Service |       |        |      |        |        |       |        |      |       |       |
| 3 | Utilization       | 3.54  | <0.001 | 0.87 | 1.82   | 5.26   | 3.46  | <0.001 | 0.76 | 1.96  | 4.96  |

5 **AD=Alzheimer's Disease ;FTD=frontotemporal dementia ;MD= mixed dementia ;Lewy= Lewy body associated; VD=vascular dementia; PAC=positive**  
 6 **aspects of caregivers; NPI= the Neuropsychiatric Inventory; PSQI= Pittsburgh Sleep Quality Index; ADL=activities of daily life.**

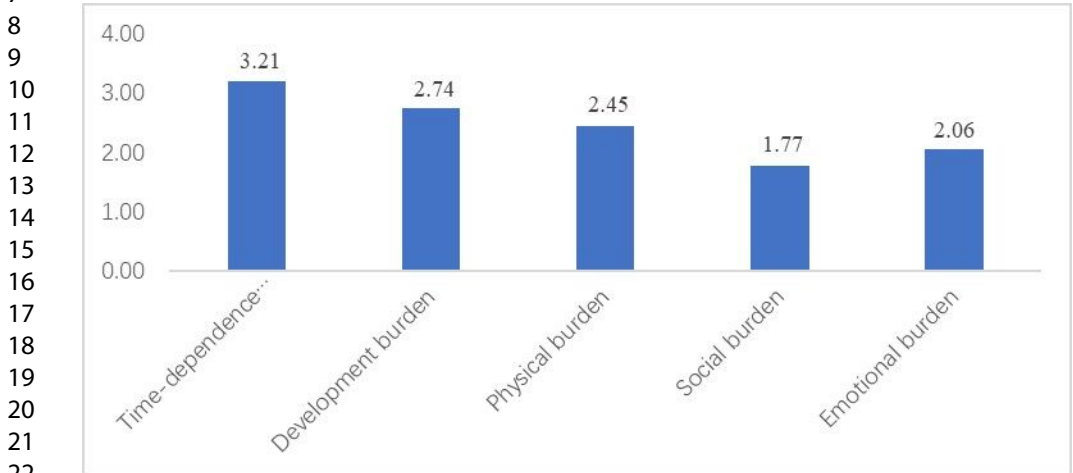

23 **Figure 1: The average score of five domains of Caregiver burden index**

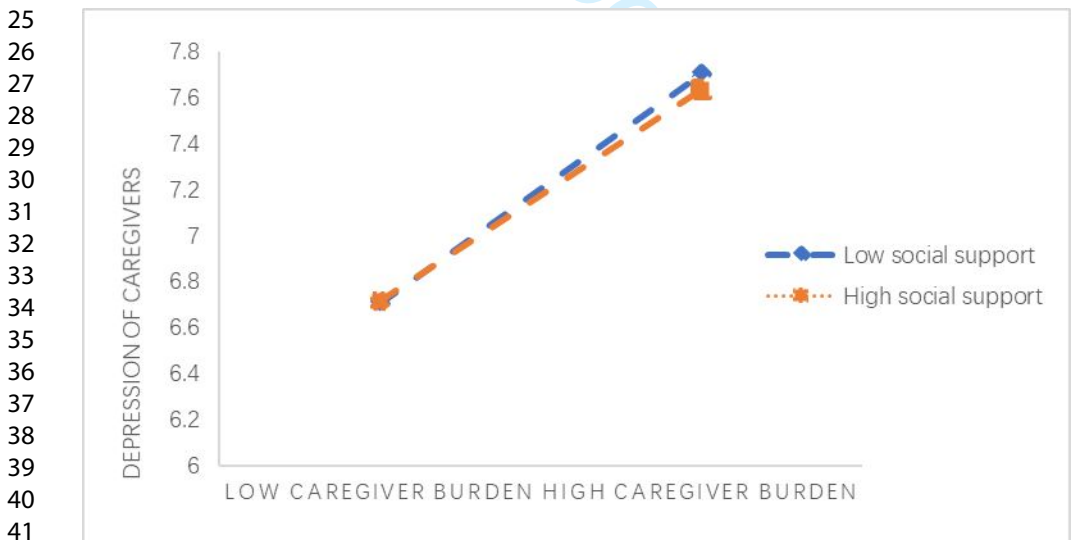

43 **Figure 2 The association between caregivers' depression and caregivers' depression.**

1  
2  
3  
4  
5  
6  
7  
8  
9  
10  
11  
12  
13  
14  
15  
16  
17  
18  
19  
20  
21  
22  
23  
24  
25  
26  
27  
28  
29  
30  
31  
32  
33  
34  
35  
36  
37  
38  
39  
40  
41  
42  
43  
44  
45  
46  
47  
48  
49  
50  
51  
52  
53  
54  
55  
56  
57  
58  
59  
60

For peer review only

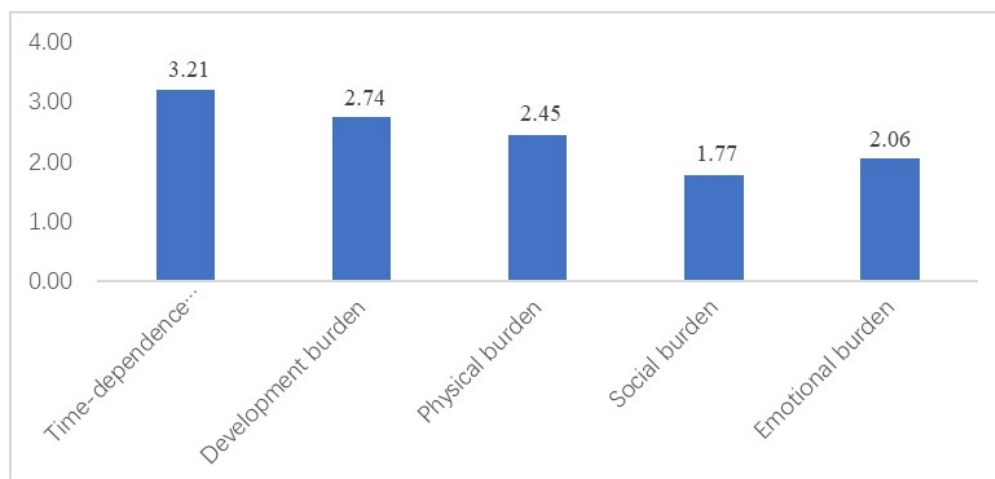

Figure 1 The average score of five domains of Caregiver burden index

130x62mm (150 x 150 DPI)



1  
2  
3  
4  
5  
6  
7  
8  
9  
10  
11  
12  
13  
14  
15  
16  
17  
18  
19  
20  
21  
22  
23  
24  
25  
26  
27  
28  
29  
30  
31  
32  
33  
34  
35  
36  
37  
38  
39  
40  
41  
42  
43  
44  
45  
46  
47  
48  
49  
50  
51  
52  
53  
54  
55  
56  
57  
58  
59  
60

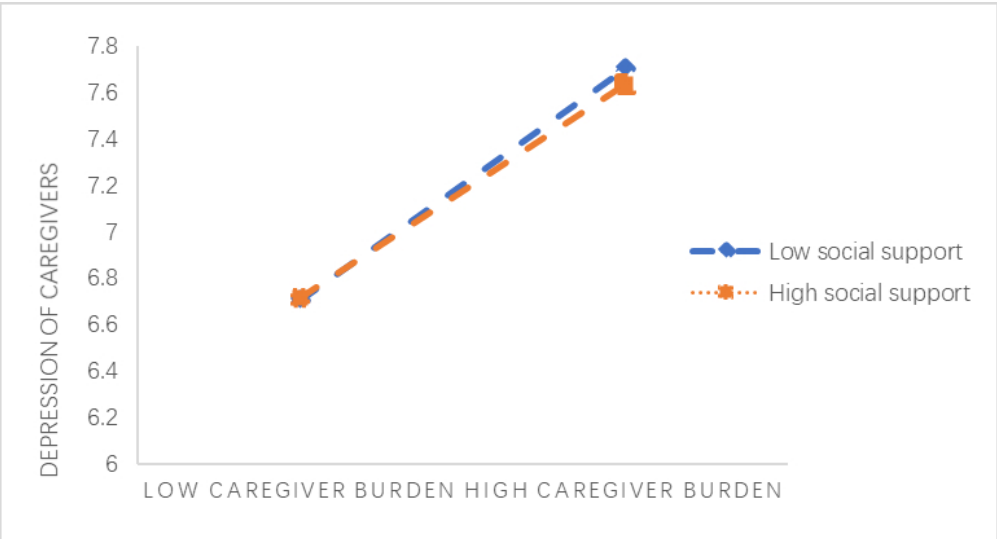

Figure 2 The association between caregivers' depression and caregivers' depression.

332x179mm (59 x 59 DPI)

STROBE Statement—Checklist of items that should be included in reports of *cross-sectional studies*

|                              | Item No | Recommendation                                                                                                                                                                                               | Page No |
|------------------------------|---------|--------------------------------------------------------------------------------------------------------------------------------------------------------------------------------------------------------------|---------|
| <b>Title and abstract</b>    | 1       | (a) Indicate the study's design with a commonly used term in the title or the abstract                                                                                                                       | 1       |
|                              |         | (b) Provide in the abstract an informative and balanced summary of what was done and what was found                                                                                                          | 1       |
| <b>Introduction</b>          |         |                                                                                                                                                                                                              |         |
| Background/rationale         | 2       | Explain the scientific background and rationale for the investigation being reported                                                                                                                         | 1-2     |
| Objectives                   | 3       | State specific objectives, including any prespecified hypotheses                                                                                                                                             | 3       |
| <b>Methods</b>               |         |                                                                                                                                                                                                              |         |
| Study design                 | 4       | Present key elements of study design early in the paper                                                                                                                                                      | 3       |
| Setting                      | 5       | Describe the setting, locations, and relevant dates, including periods of recruitment, exposure, follow-up, and data collection                                                                              | 3       |
| Participants                 | 6       | (a) Give the eligibility criteria, and the sources and methods of selection of participants                                                                                                                  | 3       |
| Variables                    | 7       | Clearly define all outcomes, exposures, predictors, potential confounders, and effect modifiers. Give diagnostic criteria, if applicable                                                                     | 4       |
| Data sources/<br>measurement | 8*      | For each variable of interest, give sources of data and details of methods of assessment (measurement). Describe comparability of assessment methods if there is more than one group                         | 3       |
| Bias                         | 9       | Describe any efforts to address potential sources of bias                                                                                                                                                    |         |
| Study size                   | 10      | Explain how the study size was arrived at                                                                                                                                                                    | 3       |
| Quantitative variables       | 11      | Explain how quantitative variables were handled in the analyses. If applicable, describe which groupings were chosen and why                                                                                 |         |
| Statistical methods          | 12      | (a) Describe all statistical methods, including those used to control for confounding                                                                                                                        | 6       |
|                              |         | (b) Describe any methods used to examine subgroups and interactions                                                                                                                                          | 6       |
|                              |         | (c) Explain how missing data were addressed                                                                                                                                                                  |         |
|                              |         | (d) If applicable, describe analytical methods taking account of sampling strategy                                                                                                                           |         |
|                              |         | (e) Describe any sensitivity analyses                                                                                                                                                                        |         |
| <b>Results</b>               |         |                                                                                                                                                                                                              |         |
| Participants                 | 13*     | (a) Report numbers of individuals at each stage of study—eg numbers potentially eligible, examined for eligibility, confirmed eligible, included in the study, completing follow-up, and analysed            | 6       |
|                              |         | (b) Give reasons for non-participation at each stage                                                                                                                                                         | 3       |
|                              |         | (c) Consider use of a flow diagram                                                                                                                                                                           |         |
| Descriptive data             | 14*     | (a) Give characteristics of study participants (eg demographic, clinical, social) and information on exposures and potential confounders                                                                     | 6       |
|                              |         | (b) Indicate number of participants with missing data for each variable of interest                                                                                                                          |         |
| Outcome data                 | 15*     | Report numbers of outcome events or summary measures                                                                                                                                                         | 7       |
| Main results                 | 16      | (a) Give unadjusted estimates and, if applicable, confounder-adjusted estimates and their precision (eg, 95% confidence interval). Make clear which confounders were adjusted for and why they were included | 7       |

|                          |    |                                                                                                                                                                            |    |
|--------------------------|----|----------------------------------------------------------------------------------------------------------------------------------------------------------------------------|----|
|                          |    | (b) Report category boundaries when continuous variables were categorized                                                                                                  |    |
|                          |    | (c) If relevant, consider translating estimates of relative risk into absolute risk for a meaningful time period                                                           |    |
| Other analyses           | 17 | Report other analyses done—eg analyses of subgroups and interactions, and sensitivity analyses                                                                             | 7  |
| <b>Discussion</b>        |    |                                                                                                                                                                            |    |
| Key results              | 18 | Summarise key results with reference to study objectives                                                                                                                   | 7  |
| Limitations              | 19 | Discuss limitations of the study, taking into account sources of potential bias or imprecision. Discuss both direction and magnitude of any potential bias                 | 10 |
| Interpretation           | 20 | Give a cautious overall interpretation of results considering objectives, limitations, multiplicity of analyses, results from similar studies, and other relevant evidence | 9  |
| Generalisability         | 21 | Discuss the generalisability (external validity) of the study results                                                                                                      | 8  |
| <b>Other information</b> |    |                                                                                                                                                                            |    |
| Funding                  | 22 | Give the source of funding and the role of the funders for the present study and, if applicable, for the original study on which the present article is based              | 10 |

\*Give information separately for exposed and unexposed groups.

**Note:** An Explanation and Elaboration article discusses each checklist item and gives methodological background and published examples of transparent reporting. The STROBE checklist is best used in conjunction with this article (freely available on the Web sites of PLoS Medicine at <http://www.plosmedicine.org/>, Annals of Internal Medicine at <http://www.annals.org/>, and Epidemiology at <http://www.epidem.com/>). Information on the STROBE Initiative is available at [www.strobe-statement.org](http://www.strobe-statement.org).

# BMJ Open

## Caregiver Burden and Its Associated Factors among Family Caregivers of Persons with Dementia in Shanghai, China: A Cross-Sectional Study

|                                 |                                                                                                                                                                                                                                                                                                                                                                                                                                                                                                                                                                                                                                                                                |
|---------------------------------|--------------------------------------------------------------------------------------------------------------------------------------------------------------------------------------------------------------------------------------------------------------------------------------------------------------------------------------------------------------------------------------------------------------------------------------------------------------------------------------------------------------------------------------------------------------------------------------------------------------------------------------------------------------------------------|
| Journal:                        | <i>BMJ Open</i>                                                                                                                                                                                                                                                                                                                                                                                                                                                                                                                                                                                                                                                                |
| Manuscript ID                   | bmjopen-2021-057817.R1                                                                                                                                                                                                                                                                                                                                                                                                                                                                                                                                                                                                                                                         |
| Article Type:                   | Original research                                                                                                                                                                                                                                                                                                                                                                                                                                                                                                                                                                                                                                                              |
| Date Submitted by the Author:   | 14-Jan-2022                                                                                                                                                                                                                                                                                                                                                                                                                                                                                                                                                                                                                                                                    |
| Complete List of Authors:       | Liu, Zhijian; Second Military Medical University School of Nursing, wenjing, sun; Shanghai Changzheng Hospital, neurology<br>Chen, Honglin; Fudan University<br>Zhuang, Jianhua; Shanghai Changzheng Hospital, Department of Neurology<br>Wu, Bei; New York University, Rory Meyers College of Nursing<br>Xu, Hanzhang; Duke University School of Nursing; Duke University School of Medicine,<br>Li, Peng; Shanghai Changzheng Hospital, Department of Neurology<br>Chen, Xiaohan; Shanghai Changzheng Hospital, Department of Neurology<br>Li, Juan; Second Military Medical University School of Nursing<br>Yin, You; Shanghai Changzheng Hospital, Department of Neurology |
| <b>Primary Subject Heading</b>: | Nursing                                                                                                                                                                                                                                                                                                                                                                                                                                                                                                                                                                                                                                                                        |
| Secondary Subject Heading:      | Nursing                                                                                                                                                                                                                                                                                                                                                                                                                                                                                                                                                                                                                                                                        |
| Keywords:                       | Dementia < NEUROLOGY, Adult intensive & critical care < ANAESTHETICS, Health policy < HEALTH SERVICES ADMINISTRATION & MANAGEMENT                                                                                                                                                                                                                                                                                                                                                                                                                                                                                                                                              |
|                                 |                                                                                                                                                                                                                                                                                                                                                                                                                                                                                                                                                                                                                                                                                |

SCHOLARONE™  
Manuscripts

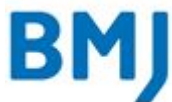

I, the Submitting Author has the right to grant and does grant on behalf of all authors of the Work (as defined in the below author licence), an exclusive licence and/or a non-exclusive licence for contributions from authors who are: i) UK Crown employees; ii) where BMJ has agreed a CC-BY licence shall apply, and/or iii) in accordance with the terms applicable for US Federal Government officers or employees acting as part of their official duties; on a worldwide, perpetual, irrevocable, royalty-free basis to BMJ Publishing Group Ltd ("BMJ") its licensees and where the relevant Journal is co-owned by BMJ to the co-owners of the Journal, to publish the Work in this journal and any other BMJ products and to exploit all rights, as set out in our [licence](#).

The Submitting Author accepts and understands that any supply made under these terms is made by BMJ to the Submitting Author unless you are acting as an employee on behalf of your employer or a postgraduate student of an affiliated institution which is paying any applicable article publishing charge ("APC") for Open Access articles. Where the Submitting Author wishes to make the Work available on an Open Access basis (and intends to pay the relevant APC), the terms of reuse of such Open Access shall be governed by a Creative Commons licence – details of these licences and which [Creative Commons](#) licence will apply to this Work are set out in our licence referred to above.

Other than as permitted in any relevant BMJ Author's Self Archiving Policies, I confirm this Work has not been accepted for publication elsewhere, is not being considered for publication elsewhere and does not duplicate material already published. I confirm all authors consent to publication of this Work and authorise the granting of this licence.

# Caregiver Burden and Its Associated Factors among Family Caregivers of Persons with Dementia in Shanghai, China: A Cross-Sectional Study

Zhijian Liu<sup>#a,b</sup>, Wenjing Sun<sup>#b,c</sup>, Honglin Chen<sup>#d</sup>, Jianhua Zhuang<sup>b</sup>, Bei Wu<sup>e</sup>, Hanzhang Xu<sup>f,g</sup>, Peng Li<sup>b</sup>, Xiaohan Chen<sup>b</sup>, Juan Li<sup>\*\*h,a</sup>, You Yin<sup>\*b</sup>

a Navy Medical University School of Nursing, Shanghai, China

b Department of Neurology, Changzheng Hospital, Navy Medical University, Shanghai, 200003, China

c Department of Neurology, Third Affiliated Hospital of the Naval Medical University, Shanghai, 200003, China

d Department of Social Work School of Social Development and Public Policy, Fudan University, Shanghai, China

e New York University Rory Meyers College of Nursing, New York, NY, United States,

f Duke University School of Nursing, Durham, NC, United States

g Duke University School of Medicine, Durham, NC, United States

h Huashan Hospital affiliated to Fudan University, Shanghai, China

# Wenjing Sun<sup>#b,c</sup>, Honglin Chen equal to Zhijian Liu.

\*Corresponding author: You Yin, [yinyou179@163.com](mailto:yinyou179@163.com);

\*\*Corresponding author: Juan Li, [lijuanjr@126.com](mailto:lijuanjr@126.com)

**Keywords:** Dementia, Caregiver burden, Family caregivers, Community

## ABSTRACT

**Objective** To assess the level of caregiver burden and factors associated with it among family caregivers of persons with dementia (PWD) living in communities of Shanghai, China.

**Design** Cross-sectional study

**Setting** Communities in Hongkou District of Shanghai, China.

**Participants** A random sample of 109 older adults with dementia and their primary family caregivers.

**Main outcome measure** Caregiver burden measured by the Caregiver Burden Inventory (CBI) and the Caregivers' depressive symptom measured by the simplified Chinese version of Self-rating Depression Scale (SDS) was the outcome variable of the study. The independent variables, including the cognitive function (measured by Montreal Cognitive Assessment (MoCA), sleep quality assessed by the Pittsburgh Sleep Quality Index (PSQI), abilities of daily life assessed by the Activities of Daily Living Scale (ADL), and behavioral and psychological symptoms assessed by the Neuropsychiatric Inventory (NPI) of PWDs, the community service utilization (measured by the Community Service Utilization Measurement), perceived social support (assessed by three questions), positive aspects of

caregiving (assessed by the Positive Aspects of Caregiving, PAC) of dementia caregivers were analyzed. Multivariate linear regression was employed to determine the factors related to caregiver burden.

**Results** The average level of CBI was  $65.92 \pm 16.74$ . The score of MoCA, PAC, and perceived social support of caregivers were negatively associated with caregiver burden ( $\beta = -0.84$ ,  $p < 0.001$ ,  $\beta = -3.61$ ,  $p = 0.03$ , and  $\beta = -1.22$ ,  $p = 0.001$ , respectively). Community service utilization was positively associated ( $\beta = 3.46$ ,  $p < 0.001$ ) with caregiver burden. Perceived social support by the caregiver moderated the relationship between caregiver burden and caregivers' depression symptom.

**Conclusion** Dementia caregivers experienced a high level of caregiver burden. The cognitive function of PWD, PAC, social support, and community service utilization were factors associated with caregiver burden. Strengthening social support, providing more high-quality home care services, promoting positive aspects of caregiving are imperative to reduce caregiver burden.

### Strengths and limitations of this study

- The study was conducted in Shanghai, which is the most aging city in China.
- The participants were randomly sampled from a convenient sample of 8,800 older adults in seven different communities.
- Factors related to PWDs as well as their family caregivers were included in the study.
- The conclusion of the present study needs to be interpreted with caution since the socioeconomic status, healthcare services, and cultural behavior vary between different regions of China.

## INTRODUCTION

With the advancement of society, the prevalence of the aging population has increased. With the increasing age, numerous underlying physiological changes occur, and the risk of the chronic disease rises<sup>1</sup>. Dementia is one of the predominant diseases occurring in the aging population. The age-standardized prevalence of dementia in older adults (age  $\geq 60$  years) varies from 5% to 7% in most regions worldwide<sup>2</sup>. According to the global population report in 2017, there were nearly 25% of older adults in China and their number is expected to increase to 478.8 million (35.1%) in 2050, according to the Department of Economic and Social Affairs of the United Nations<sup>3</sup>. The age-standardized prevalence of dementia in China is 6%. There are approximately 7.4 million PWDs in China. The number is expected to reach 18 million by 2030 if effective measures are not undertaken<sup>4</sup>.

Dementia is characterized by the deterioration of intellectual functions, executive dysfunction, sleeping disorders, emotional problem, and behavioral and psychological symptoms<sup>5</sup>. PWD rely on their family caregivers' support for daily activities. Family caregivers have to handle deteriorative function and progressive dementia-related symptoms of

PWD, thereby increasing the burden. Dementia also has a financial impact on society. The estimated total annual cost of dementia in China is predicted to increase from 0.9 billion US dollars (US\$) in 1990 to 114.2 billion US\$ in 2030. The costs of informal care accounted for 81.3% of the total estimated cost in 2010<sup>6</sup>. Caregiver burden is defined as the extent to which caregivers perceive their emotional or physical health, social life, and financial status due to caring for their relatives<sup>7</sup>. Due to the negative consequences of dementia, caregiver burden is higher among them compared to the population without dementia<sup>8</sup>. To reduce the dementia caregiver burden of PWDs, it is essential to identify factors that influence caregiver burden. Previous studies from Ireland, America, Korea, and Spain have reported significant caregiver burden in family caregivers of PWD, and it was associated with age, the severity of dementia, duration of the illness, level of neuropsychiatric symptoms, frontal lobe dysfunction, antidepressant drugs, and functional status of PWD<sup>9,10,11,12</sup>. A cross-section study in Hong Kong revealed that the prevalence of caregiver burnout was 15.5%. Caregiver burnout was associated with PWDs' ADL dependence and history of falls in the previous 90 days. Factors such as primary caregivers being adult children and the utilization of allied health services were found to be protective to caregiver burnout<sup>13</sup>. As the social services and healthcare systems are different between Hong Kong and mainland China, factors contributing to caregiver burden may also differ between the two settings. Studies on caregiver burden of dementia caregivers conducted in northern cities of China showed that the average score of caregiver burden measured by the Zarit Burden Interview (ZBI) was  $12.2 \pm 13.2$ , which lies in the mild range. Moreover, caregiver burden was associated with the functional status of PWDs, physical status, life satisfaction, depression, and anxiety of caregivers<sup>14</sup>. The study conducted by Wang et al. in central China showed that the mean score of caregiver burden measured by the caregiver burden inventory was  $44.56 \pm 10.18$ . Caregiver burden was associated with the risk of caregiver's committed abuse. However, caregiver burden was not found to be associated with social support<sup>15</sup>. Liu et al. reported that severity of dementia, daily caregiving time, depressive symptom, and anxiety of caregivers were associated with caregiver burden in Beijing<sup>16</sup>. The novelty of our study is that the earlier studies did not include some key factors, such as positive aspects of caregiving, social support, and community service utilization, that could impact caregiver burden. Further, as prior studies were conducted in the northern and central parts of China, information regarding caregiver burden among family caregivers of persons with dementia in Shanghai, which is one of the most developed cities in China, is limited. Data available for factors such as positive aspects of caregiving, perceived social support, and utilization of community services associated with the level of caregiver burden is sparse. To address the knowledge gap, this study is aimed to explore the level and factors associated with dementia caregivers' burden in communities in Shanghai. We hypothesize that the factors associated with caregiver burden are



1 community service utilization, social support, and positive aspects of caregivers as well as the cognitive function,  
2 sleep quality, ability of daily life, the behavioral and psychological symptoms of PWDs.

3  
4 Psychological health deterioration is one of the consequences of caregiver burden<sup>17</sup>. Caregivers experience  
5 psychological issues like depression and anxiety after caring for persons with dementia for a long period of time<sup>14</sup>.  
6  
7 Social support refers to an individual or a collective resource that can provide emotional and mental assistance<sup>18</sup>. The  
8 study conducted by Cohen and Thoits proposed and verified the buffering hypothesis and confirmed that social  
9 support is a buffer against life stress and protects physical and mental health<sup>19,20</sup>. As for dementia caregivers, the  
10 antecedents of caregiver burden consist of insufficient financial resources, multiple responsibilities, and lack of social  
11 activities<sup>17</sup>. Adequate social support from family and community can release stress and burden of caregivers and allow  
12 them to participate in social activities. We propose that with different levels of social support, the impact of caregiver  
13 burden on depressive symptom vary.  
14  
15  
16  
17  
18  
19  
20  
21  
22

23 In China, most PWD lives in communities and depend on their family members for caregiving. China's pilot  
24 long-term care (LTC) insurance policy is implemented in 15 cities since 2016. However, the supply and demand of  
25 LTC services are unmatched and unbalanced<sup>21</sup>. Formal care service is difficult to access at home. Support to family  
26 dementia caregivers is limited in most areas of China<sup>22</sup>, which is insufficient to reduce the caregiver burden.  
27 Furthermore, the Chinese are influenced by Confucianism, which promotes the value of filial piety and family  
28 responsibility<sup>23</sup>. Especially, in traditional Chinese culture, family secrets should be confined to family members and  
29 not be revealed to those outside the family<sup>23</sup>. The cultural sense of caregiving obligation may be a barrier for  
30 caregivers to seek help outside of the household, which leads to a high level of caregiver burden<sup>24</sup>. Therefore, we aim  
31 to conduct this study to examine the level of dementia caregiving burden in Chinese communities and explore the  
32 factors related to caregiver burden. Besides, we also explored the relationship between social support, depression of  
33 caregivers, and caregiver burden. The results of the study may provide insight into the development of programs and  
34 services to reduce caregiver burden.  
35  
36  
37  
38  
39  
40  
41  
42  
43  
44  
45  
46

## 47 **PARTICIPANTS AND METHODS**

### 48 **Participants**

49 This was a cross-sectional study conducted from March 2017 to March 2018. A total of 8800 older adults were  
50 randomly selected from seven community healthcare centers in Hongkou District, Shanghai, China. The healthcare  
51 providers in these community centers screened the cognitive function of 8549 older adults using the measure of  
52 Alzheimer's disease-8 (AD8), A score of 2+ was considered as cognitive impairment. A total of 2272 of the screened  
53 persons were designated as cognitively impaired out of which 500 persons were randomly selected using random seed  
54  
55  
56  
57  
58  
59  
60

generated by SAS. These selected individuals underwent further cognitive testing using the Mini-Mental State Examination (MMSE). A total of 456 older adults with cognitive impairment ( $MMSE < 26$ ) were identified, and they were invited along with their primary family caregivers to the Neurology Clinic of Changzheng Hospital for further comprehensive neuropsychological assessment by neurologists. The primary family caregivers were defined as unpaid family members who were primarily taking care of the older adults and were well aware of their condition and environment<sup>25</sup>. A total of 116 older adults were diagnosed with dementia. All the PWDs met the NIA-AA criteria(2011) for probable Alzheimer's Disease(AD), the NINDS-AIREN criteria for vascular dementia (VaD), the Gorno-Tempini criteria (2011) for frontotemporal dementia, and dementia with Lewy body (DLB) clinical diagnostic criteria(2005) for DLB, and underwent thorough clinical examinations, medical history taking and assessment of the physical, neurological and psychiatric status, including the Hamilton Anxiety Scale; psychological test; laboratory screening test; electrocardiography (ECG); chest radiography; electroencephalography (EEG); magnetic resonance imaging (MRI) of the brain; neuropsychological assessment with the use of the mini-mental state examination (MMSE); functional autonomy evaluation using Activities of Daily Living Scale. The exclusion criteria of PWDs included: (1) visual and auditory impairment (2) severe aphasia, (3) the acute stage of chronic disease, (4) unable to sit for more than 40 min, (5) the presence of other nervous system diseases. Seven dyads of PWDs and their family caregivers refused to participate in the study. A total of 109 dyads of PWDs and their primary family caregivers consented to participate in the study. The flow chart of the sampling is shown in Figure 1. The study was approved by the ethics committees of Changzheng Hospital, and all the participants signed the informed consent.

The power of the sample size was calculated by the  $G^*power$  3.1; we chose Linear multiple regression: Fixed model, single regression coefficient. The effect size  $f^2$  was set as a large of 0.35<sup>38</sup>, the number of predictors was 7, the results showed that the power of the sample was 99.81%, indicating a sound power of the test.

### **Patients and Public Involvement**

Patients and the public were not involved in this study, including the recruitment, data collection, analysis, interpretation and dissemination of the results.

### **Variables**

#### **Outcome Variable**

The caregiver burden of the caregivers was measured by the CBI developed by Novak in 1989 to measure the caregiver burden of PWDs. CBI was widely used in disabled stroke patients, spinal cord injuries, chronic-acquired brain injury, and neurologic Wilson disease in the previous studies<sup>26</sup>. CBI included 24-items, which were divided into five domains. Each item was evaluated from “never” (0 points) to “always” (4 points) 5 levels. The five domains

were: time-dependence (Items 1 to 5, with 20 points), developmental (Items 6 to 10, with 20 points), physical (Items 11 to 14, with 16 points), social (Items 15 to 18, with 16 points), and emotional (Items 19 to 24, with 24 points)<sup>26</sup>. The total score of CBI was 96. A higher score correlates with increased caregiver burden. Chou tested the reliability and validity of the Chinese version of CBI, which showed adequate internal consistency reliability, appropriate content validity, and concurrent validity<sup>27</sup>. The Cronbach  $\alpha$  coefficients of the five domains ranged from 0.79 to 0.93. The content of validity index (CVI) of the Chinese version was 95.8%. The exploratory factor analysis showed that there were five common factors for the original scale. The accumulative variance contribution of the five common factors was 62.78%<sup>27</sup>. The inventory was used to measure the caregiver burden of dementia caregivers in central China, with a Cronbach  $\alpha$  coefficient of 0.92<sup>15</sup>. The score of CBI > 36 indicated the caregivers' "risk of burning out"<sup>28</sup>.

## **Independent Variables**

### *Caregivers' Variables*

The socio-demographic characteristics included age, gender, education, employment, and relationship of caregiver with PWDs.

The caregivers' depressive symptom was measured by the Self-rating Depression Scale (SDS) developed by Zung in 1965 to measure the level of depression of adults<sup>29</sup>. We used a simplified Chinese version that includes 12 items and has been used in the previous study<sup>30</sup>.

The community service utilization was measured by the Community Service Utilization Measurement included 10 items: nursing assistant, housekeeper, doctor, psychologist, daycare center, food delivered, ambulance, hospitalization, nursing home, and other services. Each item had two options: used or not. These items were developed according to the existing services in the communities of Shanghai.

Caregivers were asked to choose the community service they had used in the past three months. The measurement has been used in the previous study<sup>30</sup>.

Three questions measured social support perceived by caregivers: (1) How many people can be relied on when the situation is urgent; (2) How do people care about the current situations; (3) How easy it is to receive help from neighbors or colleagues when needed—total score ranges from 3 to 14, with higher scores indicating stronger social support. The measurement has been used in the previous study<sup>30</sup>.

The positive aspects of caregivers were measured by PAC. This scale was developed by Tarlow to evaluate the positive aspects of caregiving in 2004 and was translated and tested by Zhang. Cronbach's  $\alpha$  coefficient of PAC and two domains were 0.89, 0.86, and 0.80, respectively<sup>31</sup>. The scale is a self-rating scale that includes nine items with two domains, namely self-affirmation and outlook of life. The items used a 5-point Likert-type scale. The higher score

1 indicated more positive aspects of caregiving. The content validity and structural validity of the scale were  
2 acceptable<sup>31</sup>.

### 3 *Participants variables*

4  
5 The socio-demographic characteristics were age, gender, and education. The disease characteristics included  
6  
7 types of dementia (Alzheimer's disease (AD), vascular dementia, frontotemporal dementia, mixed dementia, and  
8  
9 dementia with Lewy bodies), cognitive function, subjective sleep quality, behavioral and psychological symptoms,  
10  
11 and activities of daily living.

12  
13 The cognitive function of the PWDs was assessed by MoCA developed by Nasreddine in Canada in 2004<sup>32</sup>. It  
14  
15 incorporates 8 domains of cognitive function, including attention, executive function, memory, language, visuospatial  
16  
17 skills, abstract thinking, calculation, and orientation. MoCA score ranges from 0 to 30, with a lower score indicating  
18  
19 poorer cognition. MoCA has been widely used in assessing cognitive function among patients with stroke, Parkinson's  
20  
21 disease, and other diseases. It has stable sensitivity and specificity. MoCA has been translated into 30 different  
22  
23 versions. Wang translated the MoCA-Beijing (BJ) version, and the assessment is available from [www.mocatest.org](http://www.mocatest.org).  
24  
25 Chen tested the reliability and validity of the MoCA-BJ in people with obstructive sleep apnea-hypopnea syndrome.  
26  
27 The Cronbach's  $\alpha$  of the MoCA-BJ was 0.73<sup>33</sup>.

28  
29 The sleep quality of the PWDs was assessed by the PSQI where the PWDs and their caregivers answered the  
30  
31 index. PSQI was developed by Buysse in 1989 and was translated by Liu<sup>34</sup>. The sensitivity and specificity of the  
32  
33 Chinese version of PSQI were 98.3% and 90.3%, respectively<sup>34</sup>. The PSQI is a self-report questionnaire that accesses  
34  
35 seven dimensions of sleep during the past month. The seven dimensions included subjective sleep quality, sleep  
36  
37 latency, sleep duration, habitual sleep efficiency, sleep disturbances, use of sleeping medication, and daytime  
38  
39 dysfunction. PSQI score ranged from 0 to 21, with higher scores representing poorer subjective sleep quality<sup>34</sup>.

40  
41 The abilities of daily life were assessed by the ADL scale. The response was recorded from the dementia  
42  
43 caregivers. The scale was modified by Mingyuan Zhang<sup>35</sup>. It included 20 items with stable reliability and validity<sup>35</sup>.  
44  
45 Each item score ranged from 1 (completely independent) to 4 (completely dependent). The total score ranged from 20  
46  
47 to 80, with a lower score indicating a higher level of ADL.

48  
49 The behavioral and psychological symptoms of PWDs were assessed by the NPI answered by the dementia  
50  
51 caregivers. The inventory was used to evaluate the severity and frequency of 10 common abnormal behaviors in  
52  
53 PWDs<sup>37</sup>. Tao<sup>37</sup> translated the inventory and tested the reliability and validity of the Chinese version among persons  
54  
55 with Alzheimer's disease. The Chinese version of NPI is a reliable and valid tool for measuring neuropsychiatric  
56  
57 disturbances in people with AD.  
58  
59  
60

## DATA ANALYSIS

To summarize the socio-demographic status and clinical characteristics, descriptive statistics were used. For continuous variables, mean and standard deviation (SD) were reported, and for categorical variables, numbers and proportions were reported. The univariate linear regression was used to test the association between demographic, PWDs' disease-related, and caregivers' caregiving-related variables and caregiver burden. Then only the statistically significant variables were entered into the multivariate linear regression. The statistically significant value of the univariate linear regression was set as  $p < 0.1^{36}$ . Categorical variables were transferred to dummy variables. The coding of the variables is shown in Table 1. The Statistical package for social science (SPSS) 26.0 was used to analyze the data. The statistically significant value was  $p < 0.05$ .

Multiple regression analysis was performed to examine the moderating effect of social support on the relationship between caregiver burden and caregivers' depressive symptom. Caregiver burden and depressive symptom reduced on receiving social support.

## RESULT

In total, 109 dyads of PWDs and their caregivers were included in the study. Of these PWDs, 37(33.3%) were diagnosed with AD, 15(13.5%) with frontotemporal dementia, 22(19.8%) with mixed dementia, 12(10.8%) with DLB, and 23(20.7%) with VaD. The average age of the PWDs was  $76.02 \pm 8.78$  years. The percentage of females was 57.8%. Among 109 PWDs, 83 (76.1%) have received education till high school education or above, 12(11.0%) studied till middle school, 7(6.4%) till primary school, and 7(6.4%) were illiterate. The average MoCA was  $12.50 \pm 5.84$ . The average PSQI was  $5.57 \pm 5.00$ . Eighty (72.1%) PWDs reported poor sleep quality. Socio-demographic and disease characteristics of the PWDs are shown in Table 2.

The mean age of the caregivers was  $65.18 \pm 12.03$  years. The percentage of females was 58.7%. Among the 109 caregivers, 66 (50.6%) were spouses, and 42 (36.7%) were children of the PWD. 86 (77.0%) caregivers cared for the PWDs for one to four years. 53 (47.7%) caregivers spent 21 to 40 h per week on caregiving. The mean score of CBI was  $65.92 \pm 16.74$ , which indicated a high level of caregiver burden. The average score of five domains of CBI is shown in Figure 2. The socio-demographic characteristics of the caregivers and caregiver burden are shown in Table 3.

The results of univariate and multivariate linear regression are shown in Table 4. PWD age, MoCA, PAC, community service needs, and social support all had a significant impact on caregiver burden. MoCA, PAC, and social support of caregivers were negatively associated with caregiver burden ( $\beta = -0.84$ ,  $p < 0.001$ ,  $\beta = -3.61$ ,  $p = 0.03$ , and  $\beta = -1.22$ ,  $p = 0.001$ , respectively), which indicated better PWDs' cognitive function, more PAC and a higher level of

1 social support were related to less caregiver burden. The community service needs were positively associated with  
2 caregiver burden ( $\beta = 3.46$ ,  $p < 0.001$ ), which indicated more community service needs were related to more caregiver  
3 burden.  
4  
5

6 The moderation effect of social support on the relationship between caregiver burden and caregivers' depressive  
7 symptom was tested. Social support independently contributed to caregivers' depressive symptom. Specifically, a  
8 higher level of caregiver burden displayed a high level of depressive symptom ( $b = 0.1235$ ,  $p < 0.001$ ). Moreover, the  
9 two-way interaction between social support and caregiver burden significantly contributed to caregivers' depressive  
10 symptom (unstandardized  $B = -0.027$ ,  $p = 0.011$ ), as reflected in Figure 3.  
11  
12  
13  
14  
15

## 16 **DISCUSSION**

17  
18 The level of caregiver burden in the present study was relatively higher than that in previous studies<sup>15,16</sup>. The  
19 study conducted by Wang et al. in central China demonstrated that the average CBI score of dementia caregivers was  
20  $44.6 \pm 10.2$ <sup>15</sup>. Liu et al. reported that the average CBI scores for caregivers with mild dementia, moderate dementia,  
21 and severe dementia were  $19.63 \pm 10.75$ ,  $36.48 \pm 14.20$ , and  $45.29 \pm 10.71$ , respectively in Beijing<sup>16</sup>. This was a cross-  
22 sectional study to explore the level of caregiver burden and factors related to it in PWDs in communities of Shanghai.  
23 After controlling for covariates, PWDs' cognitive function, PAC, social support, and community service needs were  
24 significantly associated with caregiver burden. Social support was a moderator for the relationship between caregiver  
25 burden and caregivers' depressive symptoms.  
26  
27  
28  
29  
30  
31  
32  
33  
34

35 Firstly, the present study has shown that worse cognitive function and older age of PWDs are related to higher  
36 caregiver burden, which is consistent with the previous studies in Beijing and Taiyuan of China.<sup>39,16</sup> Dementia is  
37 always accompanied by neuropsychiatric behaviors and decreased ADL<sup>41</sup>. With disease progression, PWD's  
38 dependence on their caregiver increases. The participants suffered from moderate to severe cognitive dysfunction in  
39 our study, and the age of the caregivers ( $65.18 \pm 12.03$  years) in our research is more than in previous  
40 studies ( $57.5 \pm 12.3$ )<sup>16</sup>.  
41  
42  
43  
44  
45  
46

47 Secondly, the level of caregiver burden in our study was relatively high compared to western countries, which  
48 can be attributed to the different social environments, cultures, healthcare policies, ethnicity, and age of  
49 caregivers<sup>21,41,42</sup>. Caregiver burden is defined as "a multidimensional response to physical, psychological, emotional,  
50 social, and financial stressors associated with the caregiving experience"<sup>43</sup>. Caregiver burden derived from the  
51 perceived stressors is influenced by psychosocial factors like social, environmental, and cultural<sup>41</sup>. A cultural sense of  
52 caregiving obligation may augment the distress and burden felt by the caregivers<sup>24</sup>. Sharing family affairs with  
53  
54  
55  
56  
57  
58  
59  
60

outsiders is not acceptable in Chinese culture<sup>23</sup>. A strong sense of family responsibility may prevent caregivers from sharing their caregiving burnout with others. These aspects are not conducive to releasing the burden of caregiving.

Thirdly, although an LTC insurance policy has been introduced since 2016 in 15 cities of China, many PWDs were not included in the policy in the pilot phase<sup>22</sup>. The participants in our study who were from Hongkou District were not covered by the policy during the interview period. Informal care from family members is the primary source of care for PWDs in China. However, due to the rapid socioeconomic shifts and changing demographic structure, reliance on the care provided by families has become untenable<sup>21</sup>. Formal care in most high-income countries has evolved into the home-and community-based care<sup>21</sup>. The situation might be responsible for more caregiver burden in our study compared to other countries. Community service is delivered at community healthcare centers, and caregivers need to bring PWD to use such service. The traffic between home and healthcare centers may increase caregiver burden. The reimbursement of community service by China's healthcare insurance is limited. Without the support of insurance, community service utilization may cause an additional financial burden to dementia caregivers. It has been reported that informal dementia caregivers seldom used respite services<sup>44</sup>. The gap between the needs of supportive community service and community service, especially home visiting service in a real environment is needed to be explored in the future.

PAC is known to be associated with a lower level of caregiver burden<sup>45</sup>. The positive aspects of caregiving refer to the satisfaction and reward stemming from the caregiving relationship<sup>46</sup>. PAC is associated with a higher level of well-being and better health condition of caregiver<sup>46</sup>. Furthermore, PAC can help caregivers cope with challenges related to caregiving<sup>46</sup>. Therefore, we found that a higher level of PAC was associated with a lower level of caregiver burden.

We found that caregivers with low-level social support had more depressive symptoms than those with high-level social support. Caregiver burden and depression are complex clinical and social problems<sup>47</sup>. Depression of caregivers was associated with providing care, social isolation, limited money, and decreased leisure time<sup>48</sup>. It has been reported that a higher level of social support is associated with a lower level of caregiver burden<sup>49</sup>. In our study, dementia caregivers received social support from family members, relatives, neighbors, and colleagues. An earlier study has confirmed that emotional support like reassurance from supporters is critical in reducing depressive symptoms<sup>50</sup>. Social support positively influences resilience, and caregivers with strong family support depict elevated resilience<sup>51</sup>. Besides, it has been found that sharing in the caregiving role can reduce the caregiver burden effectively<sup>50</sup>. Therefore, strengthening social support for caregivers may diminish the adverse effects of depressive symptoms in them.

1 The results of this study confirmed that the caregiver burden of PWDs was relatively high, and it was dependent  
2 on the factors associated with both PWD and the caregiver. Some of these factors could not be altered, such as PWDs'  
3 cognitive function. However, social support and community service are modifiable. Supportive services can be made  
4 readily available for dementia caregivers to relieve the caregiver burden. According to the China pilot, LTC insurance  
5 policy, the level of disability of older adults is assessed to determine whether the individual met the criterion of long-  
6 term care insurance. However, the assessment in European and American countries is more in-depth and  
7 comprehensive and more detailed regarding specific diseases such as dementia<sup>52,53</sup>. The evaluation in China is  
8 required to be refined in the future. The Chinese government is now continuously improving the LTC insurance  
9 policy, and the coverage is extending to more cities. LTC insurance can provide more specific services to PWDs and  
10 caregivers to alleviate depression and reduce their burden. LTC insurance may also effectively reduce the financial  
11 burden of PWDs in the future<sup>54</sup>.

12 This study had a few limitations also. The participants were recruited from the Hongkou district, part of the  
13 center of Shanghai with high socioeconomic status, advanced community services, and improved healthcare resources.  
14 Therefore, findings from this study may be restricted as caregiver burden is expected to be higher among family  
15 caregivers living in more disadvantaged areas. A large multi-site study is needed to confirm the conclusions of this  
16 study. Moreover, the study was cross-sectional; thus, the cause-and-effect relationships were not established, and it  
17 was not possible to explore the trajectory of caregiver burden of PWD across different stages of the disease.  
18 Longitudinal studies are required to overcome these limitations in the future.

## 19 CONCLUSION

20 This study highlights the emerging issues of dementia and the burden perceived by their family caregivers living  
21 in Shanghai communities. Furthermore, the factors associated with caregiver burden were explored. The result  
22 verified that caregiver burden is substantial among the family caregivers of PWDs. The cognitive function of PWD,  
23 caregivers' perceived social support, and community service utilization were found to be associated with caregiver  
24 burden. Providing adequate social support and home-visit service may alleviate the caregiver burden.

## 25 ETHICS STATEMENT

26 The study was reviewed and approved by the Institutional Review Board (IRB) of Changzheng Hospital, Second  
27 Military Medical University. Written informed consent was taken from PWDs/participants for this study. The IRB  
28 approval number was 2019SL026.

## 29 CONFLICT OF INTEREST

30 Authors have no conflict of interest to declare.



## FUNDING

This work was supported by Science and Technology Support Projects in Biomedicine Field of Shanghai Science and Technology Commission (#19441907500); Medical Innovation Projects of Second Military Medical University military (#2017JS07); Science and Technology Action Innovation program by the Science and Technology Commission of Shanghai (#17411950104); Characteristic Services of Veteran Cadres Memory Disorders Diagnosis and Treatment in Changzheng hospital (2020CZWJFW12); Shanghai Pujiang Program(#18PJC115) and Naval Medical University Nursing Discipline Talent Training Program (18QPBJ06).

## ACKNOWLEDGMENTS

We thank Dr. Yan Zhang for her contribution to data collection.

## CONTRIBUTORSHIP STATEMENT

Zhijian Liu designed the concept, analyzed data, interpreted data, and prepared the manuscript.

Wenjing Sun designed the concept, analyzed data, interpreted data, and prepared the manuscript.

Honglin Chen designed the concept, analyzed data, interpreted data, and prepared the manuscript.

Jianhua Zhuang interpreted the outcome and reviewed the manuscript.

Bei Wu, interpreted the outcome and reviewed the manuscript.

Hanzhang Xu, interpreted the outcome and reviewed the manuscript.

Peng Li, collected the data.

Xiaohan Chen, collected the data.

You Yin, designed the concept, interpreted the outcome, and reviewed the manuscript.

Juan Li, designed the concept, interpreted the outcome, and reviewed manuscript

All authors have read and approved the submission and ensure that this is the case.

## DATA AVAILABILITY STATEMENT

Data are available upon reasonable request.

## REFERENCES

1. World Health Organization. (2015). World report on aging and health.
2. Prince, M., Bryce, R., Albanese, E., Wimo, A., Ribeiro, W., & Ferri, C. P.. (2013). The global prevalence of dementia: a systematic review and meta-analysis. *Alzheimer's & Dementia*, 9(1), 63–75.e2. DOI: 10.1016/j.jalz.2012.11.007
3. United Nations Department of Economic and Social Affairs Population Division. World population ageing, 2017.

- 1 4. Ding, D. , Zhao, Q. , Guo, Q. , Meng, H. , Wang, B. , & Yu, P. Luo, J., Zhou, Y. , Yu, L. , Zheng, L. . (2014). The  
2 shanghai aging study: study design, baseline characteristics, and prevalence of dementia. *Neuroepidemiology*,  
3 43(2), 114–122. DOI:10.1159/000366163.
- 4 5. American Psychiatric Association. (2000). *Diagnostic and statistical manual of mental disorders, Fourth Edition:*  
5 *DSM-IV-TR®*. Washington DC: American Psychiatric Pub.
- 6 6. Xu, J. , Jian, W. , Anders, W. , Laura, F. , & Qiu, C.. (2017). The economic burden of dementia in China, 1990–  
7 2030: implications for health policy. *Bulletin of the World Health Organization*, 95(1), 18. DOI:  
8 10.2471/BLT.15.167726.
- 9 7. Zarit, S. H. , Todd, P. A. , Zarit, J. M. . (1986). Subjective burden of husbands and wives as caregivers: a  
10 longitudinal study. *Gerontologist*, 26(3), 260–266. DOI: 10.1093/geront/26.3.260.
- 11 8. Bertrand, R., M. . (2006). Are all caregivers created equal? stress in caregivers to adults with and without  
12 dementia. *Journal of Aging & Health*, 18(4), 534. DOI:10.1177/0898264306289620.
- 13 9. Kim, M.D., et al. (2009). Caregiver burden among caregivers of Koreans with dementia. *Gerontology*, 55, 106–  
14 113. DOI: 10.1159/000176300.
- 15 10. Gallagher, D., Mhaolain, A. N., Crosby, L., Ryan, D., & Lawlor, B. A.. (2011). Self-efficacy for managing  
16 dementia may protect against burden and depression in alzheimer’s caregivers. *Aging and Mental Health*, 15(6),  
17 663–670. DOI: 10.1080/13607863.2011.562179.
- 18 11. Yeager, C. A., Hyer, L. A., Hobbs, B., & Coyne, A. C.. (2010). Alzheimer’s disease and vascular dementia: the  
19 complex relationship between diagnosis and caregiver burden. *Issues in Mental Health Nursing*, 31(6), 376. DOI:  
20 10.3109/01612840903434589.
- 21 12. Conde-Sala, J. L., Garre-Olmo, J., O Turró-Garriga, Vilalta-Franch, J., & S López-Pousa. (2010). Differential  
22 features of burden between spouse and adult-child caregivers of patients with Alzheimer’s disease: an exploratory  
23 comparative design. *International Journal of Nursing Studies*, 47(10), 1262–1273. DOI:  
24 10.1016/j.ijnurstu.2010.03.001.
- 25 13. Chan, C. Y., Cheung, G., Martinez-Ruiz, A., Chau, P. Y. K., & Wong, E. L. Y.. (2021). Caregiving burnout of  
26 community-dwelling people with dementia in Hongkong and New Zealand: a cross-sectional study. *BMC*  
27 *Geriatrics*, 21(1). DOI: 10.1186/s12877–021–02153–6.
- 28 14. Liu, S., Li, C., Shi, Z., Wang, X., Zhou, Y., Liu, S., Liu, J., Yu, T., Ji, Y.(2016). Caregiver burden and prevalence  
29 of depression, anxiety and sleep disturbances in Alzheimer’s disease caregivers in China. *Journal of Clinical*  
30 *Nursing*. DOI:10.1111/jocn.13601.

- 1 15. Min, Wang, Huimin, et al. Prevalence and associated factors of elder abuse in family caregivers of older people  
2 with dementia in central China: a cross-sectional study. [J]. *International journal of geriatric psychiatry*, 2018.  
3 DOI: 10.1002/gps.5020.  
4
- 5 16. Jia L , Wang L N , Tan J P , et al. Burden, anxiety and depression in caregivers of veterans with dementia in  
6 Beijing [J]. *Arch Gerontol Geriatr*, 2012, 55(3):560–563. DOI: 10.1016/j.archger.2012.05.014.  
7
- 8 17. Chou, K. R.. (2000). Caregiver burden: a concept analysis. *Journal of Pediatric Nursing*, 15(6), 398–407. DOI:  
9 10.1053/jpdn.2000.16709. DOI: 10.1053/jpdn.2000.16709.  
10
- 11 18. Ross, E.. (2004). *Psychosocial approaches to health, illness and disability: A reader for health care*  
12 professionals [M].  
13
- 14 19. Cohen, S., Mckay, G.. (1984). *Social support, stress, and the buffering hypothesis: A theoretical analysis.*  
15 Hillsdale. DOI: 10.4324/9781003044307–10.  
16
- 17 20. Thoits, P. A.. (1982). Conceptual, methodological, and theoretical problems in studying social support as a buffer  
18 against life stress. *J Health Soc Behav*, 23(2), 145 – 159. DOI:10.2307/2136511.  
19
- 20 21. Du, P., Dong, T., Ji, J.. (2020). Current status of the long-term care security system for older adults in China.  
21 *Research on Aging*, 43(3), 016402752094911. DOI:10.1177/0164027520949117.  
22
- 23 22. Feng, J., Wang, Z., Yu, Y.. (2020). Does long-term care insurance reduce hospital utilization and medical  
24 expenditures? evidence from China. *Social Science & Medicine*, 258, 113081. DOI:  
25 10.1016/j.socscimed.2020.113081.  
26
- 27 23. Chan, Wai-Chi S. Family caregiving in dementia: the Asian perspective of a global problem [J]. *Dementia &*  
28 *Geriatric Cognitive Disorders*, 2010, 30(6):469–478. DOI: 10.1159/000322086.  
29
- 30 24. Brando, D., Ribeiro, O., Oliveira, M., & Constana Paúl. (2017). Caring for a centenarian parent: an exploratory  
31 study on role strains and psychological distress. *Scandinavian Journal of Caring Sciences*, 31(4).  
32 DOI:10.1111/scs.12423.  
33
- 34 25. Freek, G., Judith, B., Myrra, V. D., Bernard, V., Philip, S., Van, P. J., Joling, K. J., Mary, M. , Van, W. J.. (2008).  
35 (cost)-effectiveness of family meetings on indicated prevention of anxiety and depressive symptoms and disorders  
36 of primary family caregivers of patients with dementia: design of a randomized controlled trial. *BMC Geriatrics*,  
37 8. DOI:10.1186/1471–2318–8–2.  
38
- 39 26. Novak, M., Guest, C.. (1989). Application of a multidimensional caregiver burden inventory. *Gerontologist*,  
40 29(6), 798–803. DOI:10.1093/geront/29.6.798.  
41  
42  
43  
44  
45  
46  
47  
48  
49  
50  
51  
52  
53  
54  
55  
56  
57  
58  
59  
60

- 1 27. Chou, K. R. , Jiann-Chyun, L. , Chu, H. . (2002). The reliability and validity of the Chinese version of the  
2 caregiver burden inventory. *Nursing Research*, 51(5), 324. DOI:10.1097/00006199-200209000-00009.
- 3  
4 28. Torrisi, M., Cola, M., Marra, A. , Luca, R. D. , RS Calabrò. (2017). Neuropsychiatric symptoms in dementia may  
5 predict caregiver burden: a sicilian exploratory study. *Psychogeriatrics*, 17(2), 103–107. DOI:10.1111/psyg.12197.
- 6  
7 29. ZUNG, William, W. K. . (1965). A self-rating depression scale. *Archives of General Psychiatry*, 12(1), 63.  
8  
9 DOI:10.1001/archpsyc.1965.01720310065008.
- 10  
11 30. Chen, H., Chi, I. , Liu, R. . (2018). Hospital utilization among Chinese older adults: patterns and predictors.  
12  
13 *Journal of Aging and Health*, 31, 089826431878054. DOI:10.1177/0898264318780546.
- 14  
15 31. Zhang, R.. (2007). Reliability and validity of Chinese version of positive aspects of caregiving. *Chinese Journal of*  
16  
17 *Nursing*. [http://en.cnki.com.cn/Article\\_en/CJFDTOTAL-ZHHL200712005.htm](http://en.cnki.com.cn/Article_en/CJFDTOTAL-ZHHL200712005.htm).
- 18  
19 32. Nasreddine Z S, Phillips N A , Valérie Bédirian, et al. The Montreal Cognitive Assessment, MoCA: A Brief  
20  
21 Screening Tool For Mild Cognitive Impairment[J]. *Journal of the American Geriatrics Society*, 2005, 53(4):695-  
22  
23 699. DOI: 10.1111/j.1532-5415.2005.53221.x.
- 24  
25 33. Chen X., Zhang R. , Xiao Y. , Dong J. , Niu X. , Kong W. (2015). Reliability and Validity of the Beijing Version  
26  
27 of the Montreal Cognitive Assessment in the Evaluation of Cognitive Function of Adult Patients with OSAHS.  
28  
29 *PLoS One*, 10(7), e0132361. DOI:10.1371/journal.pone.0132361.
- 30  
31 34. Liu, X. C., Tang, M. Q. Hu, L., Wang, A. Z. ,Wu, H. X. , Zhao, G. F., Gao, C. N., Li, W. S.. (1996). Reliability  
32  
33 and validity of the Pittsburgh sleep quality index. *Chinese Journal of Psychiatry*, 29(2), 29103–29107.
- 34  
35 35. Guo Q, Hong Z. (2016). *Neuropsychological Assessment*. 2nd Ed. Shanghai: Shanghai science and technology  
36  
37 press.
- 38  
39 36. Bursac, Z., Gauss, C. H., Williams, D. K., & Hosmer, D. W.. (2008). Purposeful selection of variables in logistic  
40  
41 regression. *Source Code for Biology and Medicine*, 3(1), 17. DOI:10.1186/1751-0473-3-17.
- 42  
43 37. Wang T, Xiao S F, Wang H, Liu Y Y, Su N, Fang Y R. (2021). Reliability and validity of the Chinese version of  
44  
45 the neuropsychiatric inventory in mainland China. *Int J Geriatr Psychiatry*, 27(5):539–544.  
46  
47 DOI:10.1002/gps.2757.
- 48  
49 38. Cohen, J.. (1988). *Statistical power analysis for the behavioral sciences* (2nd ed.. L. Erlbaum Associates:407.  
50  
51 DOI: 10.1080/00401706.1989.10488618.
- 52  
53 39. Yu, H., Wang, X., He, R., Liang, R., & Zhou, L. (2015). Measuring the Caregiver Burden of Caring for  
54  
55 Community-Residing People with Alzheimer’s Disease. *PloS one*, 10(7), e0132168.  
56  
57 DOI:10.1371/journal.pone.0132168.
- 58  
59  
60

- 1 40. Jia L, Wang L N , Tan J P , et al. Burden, anxiety and depression in caregivers of veterans with dementia in  
2 Beijing [J]. *Arch Gerontol Geriatr*, 2012, 55(3):560–563. DOI: 10.1016/j.archger.2012.05.014.
- 3  
4  
5 41. Saari Toni., Hallikainen Ilona., Hintsa Taina., Koivisto Anne M.(2019). Neuropsychiatric symptoms and activities  
6 of daily living in Alzheimer’s disease: ALSOVA 5-year follow-up study. *Int Psychogeriatr*, undefined(undefined),  
7 1–11. DOI:10.1017/S1041610219001571.
- 8  
9  
10 42. Allen Andrew P., Buckley Maria M., Cryan John F., Ní Chorcoráin Aoife., Dinan Timothy G., Kearney Patricia  
11 M., O’Caoimh Rónán., Calnan Mareeta., Clarke Gerard., Molloy D William.(2019). Informal caregiving for  
12 dementia patients: the contribution of patient characteristics and behaviours to caregiver burden. *Age Ageing*,  
13 49(1), 52–56. DOI:10.1093/ageing/afz128.
- 14  
15  
16  
17  
18 43. Kasuya, R. T. , Polgar-Bailey, P. , Takeuchi, R. . (2001). Caregiver burden and burnout: a guide for primary care  
19 physicians. *Postgraduate Medicine*, 108(7), 119–123. DOI:10.3810/pgm.2000.12.1324.
- 20  
21  
22  
23 44. Su, J. A. , Chang, C. C. . (2020). Association between family caregiver burden and affiliate stigma in the families  
24 of people with dementia. *International Journal of Environmental Research and Public Health*, 17(8).  
25 DOI:10.3390/ijerph17082772.
- 26  
27  
28 45. Xue, H. , Zhai, J. , He, R. , Zhou, L. , Liang, R. , Yu, H. . (2018). Moderating role of positive aspects of  
29 caregiving in the relationship between depression in persons with Alzheimer’s disease and caregiver burden.  
30 *Psychiatry Research*, 261, 400. DOI:10.1016/j.psychres.2017.12.088.
- 31  
32  
33  
34 46. Tarlow, B. J. , Wisniewski, S. R. , Belle, S. H. , Rubert, M. , Gallagher-Thompson, D. . (2004). Positive aspects of  
35 caregiving: contributions of the reach project to the development of new measures for alzheimer’s caregiving.  
36 *Research on Aging*, 26(4), 429–453. DOI:10.1177/0164027504264493.
- 37  
38  
39  
40 47. Springate, B. , Tremont, G. . (2013). Caregiver burden and depression in mild cognitive impairment. *Journal of*  
41 *Applied Gerontology*, 32(6), 765–775. DOI:10.1177/0733464811433486.
- 42  
43  
44 48. Simpson, C. , Carter, P. . (2013). Dementia behavioral and psychiatric symptoms: effect on caregiver’s sleep.  
45 *Journal of Clinical Nursing*, 22(21–22). DOI:10.1111/jocn.12127.
- 46  
47  
48  
49 49. Xian, M. , Xu, L. . (2019). Social support and self-rated health among caregivers of people with dementia: the  
50 mediating role of caregiving burden. *Dementia (2)*, 147130121983746. DOI:10.1177/1471301219837464.
- 51  
52  
53 50. Huang, C. Y. , Musil, C. M. , Zauszniewski, J. A. , Wykle, M. L. . (2006). Effects of social support and coping of  
54 family caregivers of older adults with dementia in Taiwan. *Int J Aging Hum Dev*, 63(1), 1–25.  
55 DOI:10.2190/72JU-ABQA-6L6F-G98Q.
- 56  
57  
58  
59  
60

- 1 51. Cohen, S., Mckay, G.. (1984). Social support, stress, and the buffering hypothesis: A theoretical analysis.  
 2 Hillsdale. <http://www.psy.cmu.edu/~scohen/buffer84.pdf>.  
 3  
 4 52. Shanghai Municipal Government. (2016). Shanghai's pilot Measures for long-term care Insurance.  
 5  
 6 53. Zeng, Q., Wang, Q., Zhang, L., Xu, X.. (2020). Comparison of the measurement of long-term care costs between  
 7 China and other countries: a systematic review of the last decade. *Healthcare*, 8(2), 117.  
 8  
 9 DOI:10.3390/healthcare8020117.  
 10  
 11 54. Chen, L., Zhang, X., Xu, X.. (2020). Health insurance and long-term care services for the disabled elderly in  
 12 China: based on CHARLS data. *Risk Management and Healthcare Policy*, Volume 13, 155–162.  
 13  
 14 DOI:10.2147/RMHP.S233949.  
 15  
 16  
 17  
 18  
 19  
 20  
 21  
 22

23 Table 1: List of the associated variables  
 24

| Associated variables              | Variables                |                                             | Coding                                                                                                                 |                      |                    |
|-----------------------------------|--------------------------|---------------------------------------------|------------------------------------------------------------------------------------------------------------------------|----------------------|--------------------|
| Socio-demographic characteristics | Age                      | Continuous variable                         |                                                                                                                        |                      |                    |
|                                   | Gender                   | Categorical variable                        | Male = 1, female = 0                                                                                                   |                      |                    |
|                                   | Education level          | Categorical variable                        | Illiteracy = 1                                                                                                         |                      |                    |
|                                   |                          |                                             | Primary school = 2                                                                                                     |                      |                    |
|                                   |                          |                                             | Middle school = 3                                                                                                      |                      |                    |
|                                   | High school or above = 4 |                                             |                                                                                                                        |                      |                    |
| Status of work                    | Categorical variable     |                                             |                                                                                                                        |                      |                    |
| Relationship                      | Categorical variable     | Spouse = 1<br>Children = 2<br>Relatives = 3 |                                                                                                                        |                      |                    |
| Characteristics of disease        | Type of dementia         | Categorical variable                        | AD = 1, FTD = 2, MD = 3,<br>Lewy = 4, VD = 5                                                                           |                      |                    |
|                                   | MoCA                     | Continuous variable                         |                                                                                                                        |                      |                    |
|                                   | PISQ                     | Continuous variable                         |                                                                                                                        |                      |                    |
|                                   | NPI                      | Continuous variable                         |                                                                                                                        |                      |                    |
|                                   | ADL                      | Continuous variable                         |                                                                                                                        |                      |                    |
| Characteristics of caregivers     | Caregiving years         | Categorical variable                        | No caring = 1<br><0.5years = 2<br>0.5years-1year = 3<br>1years-4years = 4<br>5years-9years = 5<br>More than 9years = 6 |                      |                    |
|                                   |                          |                                             | Education                                                                                                              |                      |                    |
|                                   |                          |                                             | Caring hours/week                                                                                                      | Categorical variable | 0 hour-8 hours = 1 |
|                                   |                          |                                             |                                                                                                                        |                      |                    |

9 hours-20 hours = 2  
 21 hours-40 hours = 3  
 More than 40 hours = 4

|                               |                     |                          |
|-------------------------------|---------------------|--------------------------|
| Depressive symptoms           | Continuous variable |                          |
| Coping Style Questionnaire    | Continuous variable |                          |
| PAC                           | Continuous variable |                          |
| Social support                | Continuous variable |                          |
| Community Service Utilization | Continuous variable | Used = 1<br>Not used = 0 |

AD = Alzheimer's Disease; FTD =frontotemporal dementia; MD = mixed dementia; Lewy = Lewy body associated; VD =vascular dementia;  
 PAC =positive aspects of caregivers.

Table 2: Social-demographic and disease characteristics of the PWDs

| Characteristics                   | Mean $\pm$ SD     | N(%)      |
|-----------------------------------|-------------------|-----------|
| Socio-demographic characteristics |                   |           |
| Age(year)                         | 76.02 $\pm$ 8.78  |           |
| Gender                            |                   |           |
| <i>Female</i>                     |                   | 63(57.8%) |
| Education level                   |                   |           |
| <i>Below primary school</i>       |                   | 14(12.8%) |
| <i>Middle school</i>              |                   | 12(11.0%) |
| <i>High school or above</i>       |                   | 83(76.1)  |
| Disease characteristics           |                   |           |
| Type of dementia                  |                   |           |
| <i>Alzheimer's</i>                |                   | 37(33.3%) |
| <i>Frontotemporal</i>             |                   | 15(13.5%) |
| <i>Mixed</i>                      |                   | 22(19.8%) |
| <i>Lewy bodies-associated</i>     |                   | 12(10.8%) |
| <i>Vascular dementia</i>          |                   | 23(20.7%) |
| MoCA total score                  | 12.50 $\pm$ 5.84  |           |
| NPI total symptom scale           | 21.50 $\pm$ 14.94 |           |
| ADL total score                   | 42.94 $\pm$ 14.17 |           |
| Poor Sleep quality                |                   | 80(72.1%) |
| Score of PSQI                     | 5.57 $\pm$ 5.00   |           |
| <i>Subjective Sleep Quality</i>   | 0.85 $\pm$ 1.02   |           |
| <i>Sleep Latency</i>              | 1.23 $\pm$ 2.01   |           |
| <i>Sleep Duration</i>             | 0.58 $\pm$ 0.83   |           |
| <i>Habitual Sleep Efficiency</i>  | 0.64 $\pm$ 1.00   |           |
| <i>Sleep Disturbances</i>         | 0.64 $\pm$ 1.00   |           |
| <i>Use of Sleep Medications</i>   | 1.34 $\pm$ 1.49   |           |
| <i>Daytime Dysfunction</i>        | 1.34 $\pm$ 1.49   |           |

NPI = the Neuropsychiatric Inventory; PSQI = Pittsburgh Sleep Quality Index; ADL =activities of daily life

Table 3: Social-demographic characteristics and caregiver burden of caregivers

| Characteristics                | Mean $\pm$ SD     | n(%)      |
|--------------------------------|-------------------|-----------|
| Age(year)                      | 65.18 $\pm$ 12.03 |           |
| Gender                         |                   |           |
| <i>Female</i>                  |                   | 64(58.7%) |
| Education level                |                   |           |
| <i>Below primary school or</i> |                   | 12(11.0%) |
| <i>Middle school</i>           |                   | 12(11.0%) |
| <i>High school or above</i>    |                   | 85(78.0%) |
| Relationship with PWDs         |                   |           |
| <i>Spouse</i>                  |                   | 66(59.5%) |
| <i>Children</i>                |                   | 42(38.5%) |
| <i>Relatives</i>               |                   | 3(2.7%)   |
| Caregiving hours/week(h)       |                   |           |
| <20                            |                   | 12(10.8%) |
| 21–40                          |                   | 53(47.7%) |
| >40                            |                   | 44(39.6%) |
| Caregiving year (years)        |                   |           |
| $\leq 1$                       |                   | 12(11%)   |
| 1 - 5                          |                   | 86(77.5%) |
| >5                             |                   | 11(10.1%) |
| Score of SDS                   | 25.53 $\pm$ 3.84  |           |
| PAC                            | 29.49 $\pm$ 3.86  |           |
| Coping strategy                | 92.90 $\pm$ 5.78  |           |
| Social Support                 | 8.61 $\pm$ 1.32   |           |
| Community Service Utilization  | 2.46 $\pm$ 1.74   |           |
| Score of CBI                   | 65.92 $\pm$ 16.74 |           |
| <i>Time-Dependence Burden</i>  | 16.03 $\pm$ 5.59  |           |
| <i>Development Burden</i>      | 13.72 $\pm$ 3.93  |           |
| <i>Physical Burden</i>         | 9.79 $\pm$ 3.48   |           |
| <i>Social Burden</i>           | 7.09 $\pm$ 3.07   |           |
| <i>Emotional Burden</i>        | 10.28 $\pm$ 3.50  |           |

CBI =caregiver burden inventory; SDS = Self-rating Depression Scale; PAC =Positive aspects of caregiving.



Table 4: Linear regression of CBI

| Variables                     | Univariate analyses |        |       |        |       | Multivariate analyses |        |      |       |       |
|-------------------------------|---------------------|--------|-------|--------|-------|-----------------------|--------|------|-------|-------|
|                               | b                   | p      | SE    | 95%CI  |       | b                     | p      | SE   | 95%CI |       |
|                               |                     |        |       | Lower  | Upper |                       |        |      | Lower | Upper |
|                               |                     |        |       |        |       |                       |        |      |       |       |
| Age of PWDs                   | 0.48                | 0.008  | 0.18  | 0.126  | 0.835 | 0.11                  | 0.19   |      |       |       |
| Gender of PWDs                | 0.41                | 0.90   | 3.26  | -6.06  | 6.87  |                       |        |      |       |       |
| Education level of PWDs       |                     |        |       |        |       |                       |        |      |       |       |
| <i>Primary school</i>         | -10.43              | 0.25   | 9.00  | -28.28 | 7.42  |                       |        |      |       |       |
| <i>Middle school</i>          | -1.79               | 0.82   | 8.01  | -17.67 | 14.09 |                       |        |      |       |       |
| <i>High school or above</i>   | -4.60               | 0.49   | 6.63  | -17.74 | 8.54  |                       |        |      |       |       |
| Type of dementia              |                     |        |       |        |       |                       |        |      |       |       |
| <i>FTD</i>                    | -3.65               | 0.48   | 5.11  | -13.78 | 6.49  |                       |        |      |       |       |
| <i>MD</i>                     | 2.624               | 0.56   | 4.96  | -6.29  | 11.54 |                       |        |      |       |       |
| <i>Lewy</i>                   | -1.65               | 0.77   | 5.55  | -12.65 | 9.35  |                       |        |      |       |       |
| <i>VD</i>                     | 6.74                | 0.13   | 4.43  | -2.05  | 15.54 |                       |        |      |       |       |
| Score of MoCA                 | -0.80               | 0.003  | 0.10  | -1.33  | -0.27 | -0.84                 | <0.001 | 0.22 | -1.29 | -0.40 |
| Total score of NPI            | 0.30                | 0.005  | 0.06  | 0.09   | 0.50  | 0.16                  | 0.05   |      |       |       |
| Score of ADL                  | 0.41                | <0.001 | 0.11  | 0.20   | 0.63  | 0.14                  | 0.13   |      |       |       |
| Score of PSQI                 | 0.33                | 0.60   | 0.001 | -0.304 | 0.973 |                       |        |      |       |       |
| Age of caregivers             | 0.14                | 0.30   | 0.32  | -0.13  | 0.40  |                       |        |      |       |       |
| Education level of caregivers |                     |        |       |        |       |                       |        |      |       |       |
| <i>Primary school</i>         | 14.75               | 0.15   | 10.28 | -5.66  | 35.13 |                       |        |      |       |       |
| <i>Middle school</i>          | 5.75                | 0.55   | 9.69  | -13.46 | 24.96 |                       |        |      |       |       |
| <i>High school or above</i>   | 7.31                | 0.40   | 8.59  | -9.71  | 24.34 |                       |        |      |       |       |
| Relationship                  |                     |        |       |        |       |                       |        |      |       |       |
| <i>Children</i>               | 3.71                | 0.27   | 3.31  | -2.85  | 10.26 |                       |        |      |       |       |
| <i>Relatives</i>              | -17.71              | 0.07   | 9.74  | -37.02 | 1059  |                       |        |      |       |       |
| Caregiving time for each week |                     |        |       |        |       |                       |        |      |       |       |
| 9 - 20                        | -5.00               | 0.65   | 10.94 | -26.67 | 16.70 |                       |        |      |       |       |

|    |                   |        |        |       |        |        |       |        |      |       |       |
|----|-------------------|--------|--------|-------|--------|--------|-------|--------|------|-------|-------|
| 1  | 21–40             | -0.93  | 0.93   | 9.74  | -20.24 | 18.39  |       |        |      |       |       |
| 2  |                   |        |        |       |        |        |       |        |      |       |       |
| 3  | >40               | 6.89   | 0.48   | 9.80  | -12.54 | 26.31  |       |        |      |       |       |
| 4  |                   |        |        |       |        |        |       |        |      |       |       |
| 5  | caregiving years  |        |        |       |        |        |       |        |      |       |       |
| 6  |                   |        |        |       |        |        |       |        |      |       |       |
| 7  | 0.5               | -17.00 | 0.36   | 18.28 | -53.45 | 19.45  |       |        |      |       |       |
| 8  |                   |        |        |       |        |        |       |        |      |       |       |
| 9  | 0.5–1             | -15.78 | 0.32   | 15.82 | -47.15 | 15.59  |       |        |      |       |       |
| 10 |                   |        |        |       |        |        |       |        |      |       |       |
| 11 | 1–4               | -12.44 | 0.41   | 15.09 | -42.37 | 17.49  |       |        |      |       |       |
| 12 |                   |        |        |       |        |        |       |        |      |       |       |
| 13 | 5–9               | 11.86  | 0.46   | 16.04 | -19.95 | 43.67  |       |        |      |       |       |
| 14 |                   |        |        |       |        |        |       |        |      |       |       |
| 15 | >9                | 16.00  | 0.34   | 16.78 | -17.27 | 49.27  |       |        |      |       |       |
| 16 |                   |        |        |       |        |        |       |        |      |       |       |
| 17 | PAC               | -1.33  | 0.001  | 0.40  | -2.12  | -0.54  | -1.22 | 0.001  | 0.34 | -1.90 | -0.55 |
| 18 |                   |        |        |       |        |        |       |        |      |       |       |
| 19 | Coping strategy   | -0.25  | 0.38   | 0.28  | -0.80  | 0.31   |       |        |      |       |       |
| 20 |                   |        |        |       |        |        |       |        |      |       |       |
| 21 | Social Support    | -3.32  | 0.006  | 1.18  | -5.667 | -0.972 | -3.61 | <0.001 | 0.99 | -5.58 | -1.64 |
| 22 |                   |        |        |       |        |        |       |        |      |       |       |
| 23 | Community Service |        |        |       |        |        |       |        |      |       |       |
| 24 | Utilization       | 3.54   | <0.001 | 0.87  | 1.82   | 5.26   | 3.46  | <0.001 | 0.76 | 1.96  | 4.96  |

AD = Alzheimer's Disease ;FTD =frontotemporal dementia ;MD = mixed dementia ;Lewy = Lewy body associated; VD =vascular dementia;

PAC =positive aspects of caregivers; NPI = the Neuropsychiatric Inventory; PSQI = Pittsburgh Sleep Quality Index; ADL =activities of daily life.

**8800 people aged over 60 were randomly selected from 7 communities**

1  
2  
3  
4  
5  
6  
7  
8  
9  
10  
11  
12  
13  
14  
15  
16  
17  
18  
19  
20  
21  
22  
23  
24  
25  
26  
27  
28  
29  
30  
31  
32  
33  
34  
35  
36  
37  
38  
39

**Finished self-rating scale Alzheimer's disease-8 (AD8)**

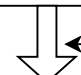

**8549**

**AD8 ≥ 2**

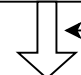

**2272**

**Randomly chose to receive Mini-Mental State Examination (MMSE)**

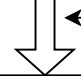

**500**

**MMSE < 26**

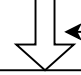

**456**

**Diagnosed with dementia by the neurologists**

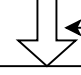

**116**

**Seven refused to participate in the study**

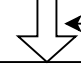

**109**

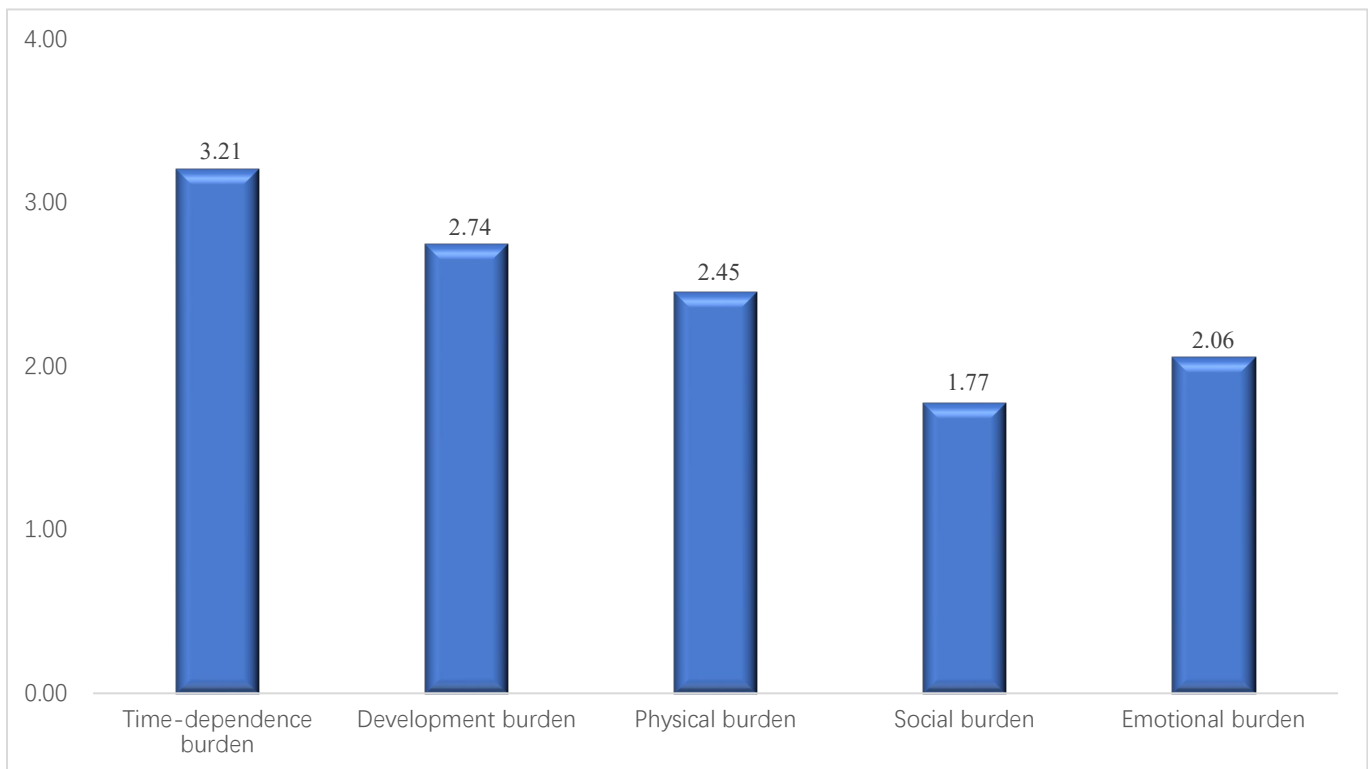

**Figure 2: Average score of five domains of the Caregiver burden index.**

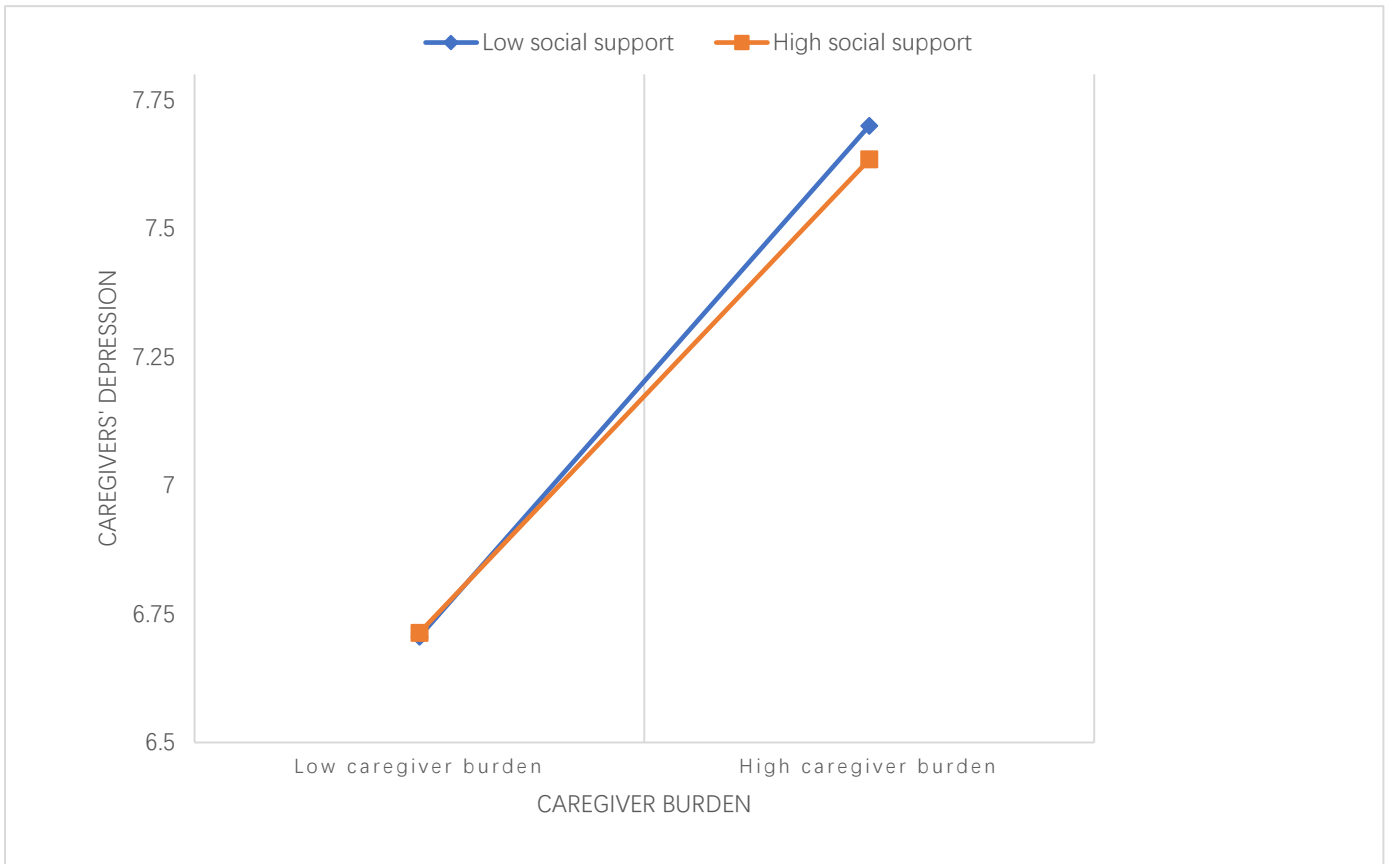

**Figure 3 Moderation effect of social support on the relationship between caregiver burden and caregivers' depressive symptom.**

1  
2  
3  
4  
5  
6  
7  
8  
9  
10  
11  
12  
13  
14  
15  
16  
17  
18  
19  
20  
21  
22  
23  
24  
25  
26  
27  
28  
29  
30  
31  
32  
33  
34  
35  
36  
37  
38  
39  
40  
41  
42  
43  
44  
45  
46  
47  
48  
49  
50  
51  
52  
53  
54  
55  
56  
57  
58  
59  
60

For peer review only

STROBE Statement—Checklist of items that should be included in reports of *cross-sectional studies*

|                              | Item No | Recommendation                                                                                                                                                                                    | Page No        |
|------------------------------|---------|---------------------------------------------------------------------------------------------------------------------------------------------------------------------------------------------------|----------------|
| <b>Title and abstract</b>    | 1       | (a) Indicate the study's design with a commonly used term in the title or the abstract                                                                                                            | 1              |
|                              |         | (b) Provide in the abstract an informative and balanced summary of what was done and what was found                                                                                               | 1              |
| <b>Introduction</b>          |         |                                                                                                                                                                                                   |                |
| Background/rationale         | 2       | Explain the scientific background and rationale for the investigation being reported                                                                                                              | 1-2            |
| Objectives                   | 3       | State specific objectives, including any prespecified hypotheses                                                                                                                                  | 3              |
| <b>Methods</b>               |         |                                                                                                                                                                                                   |                |
| Study design                 | 4       | Present key elements of study design early in the paper                                                                                                                                           | 3              |
| Setting                      | 5       | Describe the setting, locations, and relevant dates, including periods of recruitment, exposure, follow-up, and data collection                                                                   | 3              |
| Participants                 | 6       | (a) Give the eligibility criteria, and the sources and methods of selection of participants                                                                                                       | 3              |
| Variables                    | 7       | Clearly define all outcomes, exposures, predictors, potential confounders, and effect modifiers. Give diagnostic criteria, if applicable                                                          | 4              |
| Data sources/<br>measurement | 8*      | For each variable of interest, give sources of data and details of methods of assessment (measurement). Describe comparability of assessment methods if there is more than one group              | 3              |
| Bias                         | 9       | Describe any efforts to address potential sources of bias                                                                                                                                         |                |
| Study size                   | 10      | Explain how the study size was arrived at                                                                                                                                                         | 3              |
| Quantitative variables       | 11      | Explain how quantitative variables were handled in the analyses. If applicable, describe which groupings were chosen and why                                                                      |                |
| Statistical methods          | 12      | (a) Describe all statistical methods, including those used to control for confounding                                                                                                             | 6              |
|                              |         | (b) Describe any methods used to examine subgroups and interactions                                                                                                                               | 6              |
|                              |         | (c) Explain how missing data were addressed                                                                                                                                                       | Not Applicable |
|                              |         | (d) If applicable, describe analytical methods taking account of sampling strategy                                                                                                                | 5              |
|                              |         | (e) Describe any sensitivity analyses                                                                                                                                                             | Not Applicable |
| <b>Results</b>               |         |                                                                                                                                                                                                   |                |
| Participants                 | 13*     | (a) Report numbers of individuals at each stage of study—eg numbers potentially eligible, examined for eligibility, confirmed eligible, included in the study, completing follow-up, and analysed | 6              |
|                              |         | (b) Give reasons for non-participation at each stage                                                                                                                                              | 3              |
|                              |         | (c) Consider use of a flow diagram                                                                                                                                                                | 20             |
| Descriptive data             | 14*     | (a) Give characteristics of study participants (eg demographic, clinical, social) and information on exposures and potential confounders                                                          | 6              |

|                          |     |                                                                                                                                                                                                              |                |
|--------------------------|-----|--------------------------------------------------------------------------------------------------------------------------------------------------------------------------------------------------------------|----------------|
|                          |     | (b) Indicate number of participants with missing data for each variable of interest                                                                                                                          | Not Applicable |
| Outcome data             | 15* | Report numbers of outcome events or summary measures                                                                                                                                                         | 7              |
| Main results             | 16  | (a) Give unadjusted estimates and, if applicable, confounder-adjusted estimates and their precision (eg, 95% confidence interval). Make clear which confounders were adjusted for and why they were included | 7              |
|                          |     | (b) Report category boundaries when continuous variables were categorized                                                                                                                                    | 16             |
|                          |     | (c) If relevant, consider translating estimates of relative risk into absolute risk for a meaningful time period                                                                                             | Not Applicable |
| Other analyses           | 17  | Report other analyses done—eg analyses of subgroups and interactions, and sensitivity analyses                                                                                                               | 7              |
| <b>Discussion</b>        |     |                                                                                                                                                                                                              |                |
| Key results              | 18  | Summarise key results with reference to study objectives                                                                                                                                                     | 7              |
| Limitations              | 19  | Discuss limitations of the study, taking into account sources of potential bias or imprecision. Discuss both direction and magnitude of any potential bias                                                   | 10             |
| Interpretation           | 20  | Give a cautious overall interpretation of results considering objectives, limitations, multiplicity of analyses, results from similar studies, and other relevant evidence                                   | 9              |
| Generalisability         | 21  | Discuss the generalisability (external validity) of the study results                                                                                                                                        | 8              |
| <b>Other information</b> |     |                                                                                                                                                                                                              |                |
| Funding                  | 22  | Give the source of funding and the role of the funders for the present study and, if applicable, for the original study on which the present article is based                                                | 10             |

\*Give information separately for exposed and unexposed groups.

**Note:** An Explanation and Elaboration article discusses each checklist item and gives methodological background and published examples of transparent reporting. The STROBE checklist is best used in conjunction with this article (freely available on the Web sites of PLoS Medicine at <http://www.plosmedicine.org/>, Annals of Internal Medicine at <http://www.annals.org/>, and Epidemiology at <http://www.epidem.com/>). Information on the STROBE Initiative is available at [www.strobe-statement.org](http://www.strobe-statement.org).



# BMJ Open

## Caregiver Burden and Its Associated Factors among Family Caregivers of Persons with Dementia in Shanghai, China: A Cross-Sectional Study

|                                 |                                                                                                                                                                                                                                                                                                                                                                                                                                                                                                                                                                                                                                                                                |
|---------------------------------|--------------------------------------------------------------------------------------------------------------------------------------------------------------------------------------------------------------------------------------------------------------------------------------------------------------------------------------------------------------------------------------------------------------------------------------------------------------------------------------------------------------------------------------------------------------------------------------------------------------------------------------------------------------------------------|
| Journal:                        | <i>BMJ Open</i>                                                                                                                                                                                                                                                                                                                                                                                                                                                                                                                                                                                                                                                                |
| Manuscript ID                   | bmjopen-2021-057817.R2                                                                                                                                                                                                                                                                                                                                                                                                                                                                                                                                                                                                                                                         |
| Article Type:                   | Original research                                                                                                                                                                                                                                                                                                                                                                                                                                                                                                                                                                                                                                                              |
| Date Submitted by the Author:   | 14-Apr-2022                                                                                                                                                                                                                                                                                                                                                                                                                                                                                                                                                                                                                                                                    |
| Complete List of Authors:       | Liu, Zhijian; Second Military Medical University School of Nursing, wenjing, sun; Shanghai Changzheng Hospital, neurology<br>Chen, Honglin; Fudan University<br>Zhuang, Jianhua; Shanghai Changzheng Hospital, Department of Neurology<br>Wu, Bei; New York University, Rory Meyers College of Nursing<br>Xu, Hanzhang; Duke University School of Nursing; Duke University School of Medicine,<br>Li, Peng; Shanghai Changzheng Hospital, Department of Neurology<br>Chen, Xiaohan; Shanghai Changzheng Hospital, Department of Neurology<br>Li, Juan; Second Military Medical University School of Nursing<br>Yin, You; Shanghai Changzheng Hospital, Department of Neurology |
| <b>Primary Subject Heading</b>: | Nursing                                                                                                                                                                                                                                                                                                                                                                                                                                                                                                                                                                                                                                                                        |
| Secondary Subject Heading:      | Nursing                                                                                                                                                                                                                                                                                                                                                                                                                                                                                                                                                                                                                                                                        |
| Keywords:                       | Dementia < NEUROLOGY, Adult intensive & critical care < ANAESTHETICS, Health policy < HEALTH SERVICES ADMINISTRATION & MANAGEMENT                                                                                                                                                                                                                                                                                                                                                                                                                                                                                                                                              |
|                                 |                                                                                                                                                                                                                                                                                                                                                                                                                                                                                                                                                                                                                                                                                |

SCHOLARONE™  
Manuscripts



I, the Submitting Author has the right to grant and does grant on behalf of all authors of the Work (as defined in the below author licence), an exclusive licence and/or a non-exclusive licence for contributions from authors who are: i) UK Crown employees; ii) where BMJ has agreed a CC-BY licence shall apply, and/or iii) in accordance with the terms applicable for US Federal Government officers or employees acting as part of their official duties; on a worldwide, perpetual, irrevocable, royalty-free basis to BMJ Publishing Group Ltd ("BMJ") its licensees and where the relevant Journal is co-owned by BMJ to the co-owners of the Journal, to publish the Work in this journal and any other BMJ products and to exploit all rights, as set out in our [licence](#).

The Submitting Author accepts and understands that any supply made under these terms is made by BMJ to the Submitting Author unless you are acting as an employee on behalf of your employer or a postgraduate student of an affiliated institution which is paying any applicable article publishing charge ("APC") for Open Access articles. Where the Submitting Author wishes to make the Work available on an Open Access basis (and intends to pay the relevant APC), the terms of reuse of such Open Access shall be governed by a Creative Commons licence – details of these licences and which [Creative Commons](#) licence will apply to this Work are set out in our licence referred to above.

Other than as permitted in any relevant BMJ Author's Self Archiving Policies, I confirm this Work has not been accepted for publication elsewhere, is not being considered for publication elsewhere and does not duplicate material already published. I confirm all authors consent to publication of this Work and authorise the granting of this licence.

# Caregiver Burden and Its Associated Factors among Family Caregivers of Persons with Dementia in Shanghai, China: A Cross-Sectional Study

Zhijian Liu<sup>#a,b</sup>, Wenjing Sun<sup>#b,c</sup>, Honglin Chen<sup>#d</sup>, Jianhua Zhuang<sup>b</sup>, Bei Wu<sup>e</sup>, Hanzhang Xu<sup>f,g</sup>, Peng Li<sup>b</sup>, Xiaohan Chen<sup>b</sup>, Juan Li<sup>\*\*h,a</sup>, You Yin<sup>\*b</sup>

a Navy Medical University School of Nursing, Shanghai, China

b Department of Neurology, Changzheng Hospital, Navy Medical University, Shanghai, 200003, China

c Department of Neurology, Third Affiliated Hospital of the Naval Medical University, Shanghai, 200003, China

d Department of Social Work School of Social Development and Public Policy, Fudan University, Shanghai, China

e New York University Rory Meyers College of Nursing, New York, NY, United States,

f Duke University School of Nursing, Durham, NC, United States

g Duke University School of Medicine, Durham, NC, United States

h Huashan Hospital affiliated to Fudan University, Shanghai, China

# Wenjing Sun<sup>#b,c</sup>, Honglin Chen equal to Zhijian Liu.

\*Corresponding author: You Yin, [yinyou179@163.com](mailto:yinyou179@163.com);

\*\*Corresponding author: Juan Li, [lijuanjr@126.com](mailto:lijuanjr@126.com)

**Keywords:** Dementia, Caregiver burden, Family caregivers, Community

## ABSTRACT

**Objective** To assess the level of caregiver burden and factors associated with it among family caregivers of persons with dementia (PWD) living in communities of Shanghai, China.

**Design** Cross-sectional study

**Setting** Communities in Hongkou District of Shanghai, China.

**Participants** A random sample of 109 older adults with dementia and their primary family caregivers.

**Main outcome measure** Caregiver burden measured by the Caregiver Burden Inventory (CBI), and the Caregivers' depressive symptom measured by the simplified Chinese version of Self-rating Depression Scale (SDS) was the outcome variable of the study. The independent variables, including the cognitive function (measured by Montreal Cognitive Assessment (MoCA)), sleep quality assessed by the Pittsburgh Sleep Quality Index (PSQI), abilities of daily life assessed by the Activities of Daily Living Scale (ADL), and behavioral and psychological symptoms assessed by the Neuropsychiatric Inventory (NPI) of PWDs, the community service utilization (measured by the Community Service Utilization Measurement), perceived social support (assessed by three questions), positive aspects of

caregiving (assessed by the Positive Aspects of Caregiving, PAC) of dementia caregivers were analyzed. Multivariate linear regression was employed to determine the factors related to caregiver burden.

**Results** The average level of CBI was  $65.92 \pm 16.74$ . The score of MoCA, PAC, and perceived social support of caregivers were negatively associated with caregiver burden ( $\beta = -0.84$ ,  $p < 0.001$ ,  $\beta = -3.61$ ,  $p = 0.03$ , and  $\beta = -1.22$ ,  $p = 0.001$ , respectively). Community service utilization was positively associated ( $\beta = 3.46$ ,  $p < 0.001$ ) with caregiver burden. Perceived social support by the caregiver moderated the relationship between caregiver burden and caregivers' depression symptoms.

**Conclusion** Dementia caregivers experienced a high level of caregiver burden. The cognitive function of PWD, PAC, social support, and community service utilization were factors associated with caregiver burden. Strengthening social support, providing more high-quality home care services, promoting positive aspects of caregiving are imperative to reduce caregiver burden.

### Strengths and limitations of this study

- The study was conducted in Shanghai, which is the most aging city in China.
- The participants were randomly sampled from a convenient sample of 8,800 older adults in seven different communities.
- We explored the association between factors of PWDs as well as their family caregivers and caregiver burden.
- We cannot generalize the conclusion of the present study to the whole country since the socioeconomic status, healthcare services, and culture vary between different regions of China.
- A longitudinal study with larger sample size is needed to explore the linkage between caregiver burden and influencing factors.

## INTRODUCTION

With the advancement of society, the prevalence of the aging population has increased. With the increasing age, numerous underlying physiological changes occur, and the risk of the chronic disease rises<sup>[1]</sup>. Dementia is one of the predominant diseases occurring in the aging population. The age-standardized prevalence of dementia in older adults (age  $\geq 60$  years) varies from 5% to 7% in most regions worldwide<sup>[2]</sup>. According to the global population report in 2017, there were nearly 25% of older adults in China and their number is expected to increase to 478.8 million (35.1%) in 2050, according to the Department of Economic and Social Affairs of the United Nations<sup>[3]</sup>. The age-standardized prevalence of dementia in China is 6%. There are approximately 7.4 million PWDs in China. The number is expected to reach 18 million by 2030 if effective measures are not undertaken<sup>[4]</sup>.

1 Dementia is character-ized by the deterioration of intellectual functions, executive dysfunction, sleeping  
2 disorders, emotional problem, and behavioral and psychological symptoms<sup>[5]</sup>. PWD rely on their family caregivers'  
3 support for daily activities. Family caregivers have to handle deteriorative function and progressive dementia-related  
4 symptoms of PWD, thereby increasing the burden. Dementia also has a financial impact on society. The estimated  
5 total annual cost of dementia in China is predicted to increase from 0.9 billion US dollars (US\$) in 1990 to 114.2  
6 billion US\$ in 2030. The costs of informal care accounted for 81.3% of the total estimated cost in 2010<sup>[6]</sup>. Caregiver  
7 burden is defined as the extent to which caregivers perceive their emotional or physical health, social life, and  
8 financial status due to caring for their relatives<sup>[7]</sup>. Due to the negative consequences of dementia, caregiver burden is  
9 higher among them compared to the population without dementia<sup>[8]</sup>. To reduce the dementia caregiver burden of  
10 PWDs, it is essential to identify factors that influence caregiver burden. Previous studies from Ireland, America,  
11 Korea, and Spain have reported significant caregiver burden in family caregivers of PWD, and it was associated with  
12 age, the severity of dementia, duration of the illness, level of neuropsychiatric symptoms, frontal lobe dysfunction,  
13 antidepressant drugs, and functional status of PWD<sup>[9-12]</sup>. A cross-section study in Hong Kong revealed that the  
14 prevalence of caregiver burnout was 15.5%. Caregiver burnout was associated with PWDs' ADL dependence and  
15 history of falls in the previous 90 days. Factors such as primary caregivers being adult children and the utilization of  
16 allied health services were found to be protective to caregiver burnout<sup>[13]</sup>. As the social services and healthcare  
17 systems are different between Hong Kong and mainland China, factors contributing to caregiver burden may also  
18 differ between the two settings. Studies on caregiver burden of dementia caregivers conducted in northern cities of  
19 China showed that the average score of caregiver burden measured by the Zarit Burden Interview(ZBI) was  $12.2 \pm$   
20  $13.2$ , which lies in the mild range. Moreover, caregiver burden was associated with the functional status of PWDs,  
21 physical status, life satisfaction, depression, and anxiety of caregivers<sup>[14]</sup>. The study conducted by Wang et al. in  
22 central China showed that the mean score of caregiver burden measured by the caregiver burden inventory was  $44.56$   
23  $\pm 10.18$ . Caregiver burden was associated with the risk of caregiver's committed abuse. However, caregiver burden  
24 was not found to be associated with social support<sup>[15]</sup>. Liu et al. reported that severity of dementia, daily caregiving  
25 time, depressive symptom, and anxiety of caregivers were associated with caregiver burden in Beijing <sup>[16]</sup>.  
26 Abdollahpour et al. reported that positive aspects of caregiving was negatively associated with caregiver burden  
27 among 153 caregivers of people with Alzheimer's disease after controlling for caregivers' age, marriage, and  
28 dependence of patients <sup>[17]</sup>.

29 Previous studies conducted in northern and central parts of China did not include key factors associated with  
30 caregiver burden, such as positive aspects of caregiving, social support and community service utilization. Shanghai,

1 located in Eastern China, is one of the most developed and aging cities in the country. However, studies about level of  
2 caregiver burden of PWD and related factors in Shanghai was limited. Data available for factors such as positive  
3 aspects of caregiving, perceived social support and utilization of community services associated with the level of  
4 caregiver burden was sparse. To address the knowledge gap, this study aimed to explore the level and factors  
5 associated with dementia caregivers' burden in communities in Shanghai. We hypothesized that the factors associated  
6 with caregiver burden were cognitive function, sleep quality, ability of daily life, the behavioral and psychological  
7 symptoms of PWDs as well as community service utilization, social support, and positive aspects of caregivers.

15 Psychological health deterioration is one of the consequences of caregiver burden<sup>[21]</sup>. Caregivers experience  
16 psychological issues like depression and anxiety after caring for persons with dementia for a long period of time<sup>[14]</sup>.  
17 Social support refers to an individual or a collective resource that can provide emotional and mental assistance<sup>[18]</sup>. The  
18 study conducted by Cohen and Thoits proposed and verified the buffering hypothesis and confirmed that social  
19 support was a buffer against life stress and protects physical and mental health<sup>[19,20]</sup>. As for dementia caregivers, the  
20 antecedents of caregiver burden consist of insufficient financial resources, multiple responsibilities, and lack of social  
21 activities<sup>[21]</sup>. Adequate social support from family and community can release stress and burden of caregivers and  
22 allow them to participate in social activities. A cross-sectional study among people with Alzheimer's disease in  
23 Taiyuan North China showed that social support was the moderating variable in the relationship between the cognitive  
24 function of people with AD and caregiver burden. It can be seen that social support can buffer the negative aspects of  
25 caring for people with dementia<sup>[22]</sup>. We proposed that with different levels of social support, the impact of caregiver  
26 burden on depressive symptom vary, the social support was the moderating variable in the relationship between  
27 caregiver burden and depressive symptoms.

41 In China, most PWDs live in communities and depend on their family members for caregiving. China's pilot  
42 long-term care (LTC) insurance policy was implemented in 15 cities since 2016. However, the supply and demand of  
43 LTC services are unmatched and unbalanced<sup>[23]</sup>. Formal care service is difficult to access at home. Support to family  
44 dementia caregivers is limited in most areas of China<sup>[24]</sup>, which is insufficient to reduce the caregiver burden.  
45 Furthermore, the Chinese are influenced by Confucianism, which promotes the value of filial piety and family  
46 responsibility<sup>[25]</sup>. Especially, in traditional Chinese culture, family secrets should be confined to family members and  
47 not be revealed to those outside the family<sup>[25]</sup>. The cultural sense of caregiving obligation<sup>[25]</sup> may be a barrier for  
48 caregivers to seek help outside of the household, which leads to a high level of caregiver burden<sup>[26]</sup>. Therefore, we  
49 aimed to conduct this study to examine the level of dementia caregiving burden in Chinese communities and explore  
50 the factors related to caregiver burden. Besides, we also explored the relationship between social support, caregiver  
51

burden, and depression of caregivers. The results of the study may provide insight into the development of programs and services to reduce caregiver burden.

## PARTICIPANTS AND METHODS

### Participants

This was a cross-sectional study conducted from March 2017 to March 2018. A total of 8800 older adults were randomly selected from seven community healthcare centers in Hongkou District, Shanghai, China. The healthcare providers in these community centers screened the cognitive function of 8549 older adults using the measure of Alzheimer's disease-8 (AD8). A score of 2+ was considered as cognitive impairment. A total of 2272 of the screened persons were designated as cognitively impaired out of which 500 persons were randomly selected using random seed generated by SAS. These selected individuals underwent further cognitive testing using the Mini-Mental State Examination (MMSE). A total of 456 older adults with cognitive impairment ( $MMSE < 26$ ) were identified, and they were invited along with their primary family caregivers to the Neurology Clinic of Changzheng Hospital for further comprehensive neuropsychological assessment by neurologists. The primary family caregivers were defined as unpaid family members who were primarily taking care of the older adults and were well aware of their condition and environment<sup>[27]</sup>. A total of 116 older adults were diagnosed with dementia. All the PWDs met the NIA-AA criteria(2011) for probable Alzheimer's Disease(AD), the NINDS-AIREN criteria for vascular dementia (VaD), the Gorno-Tempini criteria (2011) for frontotemporal dementia, and dementia with Lewy body (DLB) clinical diagnostic criteria(2005) for DLB, and underwent thorough clinical examinations, medical history taking and assessment of the physical, neurological and psychiatric status, including the Hamilton Anxiety Scale; psychological test; laboratory screening test; electrocardiography (ECG); chest radiography; electroencephalography (EEG); magnetic resonance imaging (MRI) of the brain; neuropsychological assessment with the use of the mini-mental state examination (MMSE); functional autonomy evaluation using Activities of Daily Living Scale. The exclusion criteria of PWDs included: (1) visual and auditory impairment (2) severe aphasia, (3) the acute stage of chronic disease, (4) unable to sit for more than 40 min, (5) the presence of other nervous system diseases. Seven dyads of PWDs and their family caregivers refused to participate in the study. A total of 109 dyads of PWDs and their primary family caregivers consented to participate in the study. The flow chart of the sampling is shown in Figure 1. The study was approved by the ethics committees of Changzheng Hospital, and all the participants signed the informed consent.

The power of the sample size was calculated by the *G\*power* 3.1; we chose Linear multiple regression: Fixed model, single regression coefficient. The effect size  $f^2$  was set as a large of 0.35<sup>[28]</sup>, the number of predictors was 7, the results showed that the power of the sample was 99.81%, indicating a sound power of the test.

## 1 **Patients and Public Involvement**

2 Patients and the public were not involved in this study, including the recruitment, data collection, analysis,  
3 interpretation and dissemination of the results.  
4

## 5 **Variables**

### 6 **Outcome Variable**

7 The caregiver burden of the caregivers was measured by the CBI developed by Novak in 1989 to measure the  
8 caregiver burden of PWDs. CBI was widely used in disabled stroke patients, spinal cord injuries, chronic-acquired  
9 brain injury, and neurologic Wilson disease in the previous studies<sup>[29]</sup>. CBI included 24-items, which were divided  
10 into five domains. Each item was evaluated from “never” (0 points) to “always” (4 points) 5 levels. The five domains  
11 were: time-dependence (Items 1 to 5, with 20 points), developmental (Items 6 to 10, with 20 points), physical (Items  
12 11 to 14, with 16 points), social (Items 15 to 18, with 16 points), and emotional (Items 19 to 24, with 24 points) <sup>[29]</sup>.  
13 The total score of CBI was 96. A higher score correlates with increased caregiver burden. Chou tested the reliability  
14 and validity of the Chinese version of CBI, which showed adequate internal consistency reliability, appropriate  
15 content validity, and concurrent validity<sup>[30]</sup>. The Cronbach  $\alpha$  coefficients of the five domains ranged from 0.79 to 0.93.  
16 The content of validity index (CVI) of the Chinese version was 95.8%. The exploratory factor analysis showed that  
17 there were five common factors for the original scale. The accumulative variance contribution of the five common  
18 factors was 62.78%<sup>[30]</sup>. The inventory was used to measure the caregiver burden of dementia caregivers in central  
19 China, with a Cronbach  $\alpha$  coefficient of 0.92<sup>[15]</sup>. The score of CBI > 36 indicated the caregivers’ “risk of burning  
20 out”<sup>[31]</sup>.  
21  
22  
23  
24  
25  
26  
27  
28  
29  
30  
31  
32  
33  
34  
35  
36  
37  
38

### 39 **Independent Variables**

#### 40 *Caregivers’ Variables*

41 The socio-demographic characteristics included age, gender, education, employment, and relationship of  
42 caregiver with PWDs.  
43

44 The caregivers’ depressive symptom was measured by the Self-rating Depression Scale (SDS) developed by  
45 Zung in 1965 to measure the level of depression of adults<sup>[32]</sup>. We used a simplified Chinese version that includes 12  
46 items and has been used in the previous study<sup>[33]</sup>.  
47

48 The community service utilization was measured by the Community Service Utilization Measurement included  
49 10 items: nursing assistant, housekeeper, doctor, psychologist, daycare center, food delivered, ambulance,  
50 hospitalization, nursing home, and other services. Each item had two options: used or not. These items were  
51 developed according to the existing services in the communities of Shanghai.  
52  
53  
54  
55  
56  
57  
58  
59  
60



Caregivers were asked to choose the community service they had used in the past three months. The measurement has been used in the previous study<sup>[33]</sup>.

Three questions measured social support perceived by caregivers: (1) How many people can be relied on when the situation is urgent; (2) How do people care about the current situations; (3) How easy it is to receive help from neighbors or colleagues when needed—total score ranges from 3 to 14, with higher scores indicating stronger social support. The measurement has been used in the previous study<sup>[33]</sup>.

The positive aspects of caregivers were measured by PAC. This scale was developed by Tarlow to evaluate the positive aspects of caregiving in 2004 and was translated and tested by Zhang. Cronbach's  $\alpha$  coefficient of PAC and two domains were 0.89, 0.86, and 0.80, respectively<sup>[34]</sup>. The scale is a self-rating scale that includes nine items with two domains, namely self-affirmation and outlook on life. The items used a 5-point Likert-type scale. The higher score indicated more positive aspects of caregiving. The content validity and structural validity of the scale were acceptable<sup>[34]</sup>.

#### *Participants variables*

The socio-demographic characteristics were age, gender, and education. The disease characteristics included types of dementia (Alzheimer's disease (AD), vascular dementia, frontotemporal dementia, mixed dementia, and dementia with Lewy bodies), cognitive function, subjective sleep quality, behavioral and psychological symptoms, and activities of daily living.

The cognitive function of the PWDs was assessed by MoCA developed by Nasreddine in Canada in 2004<sup>[35]</sup>. It incorporates 8 domains of cognitive function, including attention, executive function, memory, language, visuospatial skills, abstract thinking, calculation, and orientation. MoCA score ranges from 0 to 30, with a lower score indicating poorer cognition. MoCA has been widely used in assessing cognitive function among patients with stroke, Parkinson's disease, and other diseases. It has stable sensitivity and specificity. MoCA has been translated into 30 different versions. Wang translated the MoCA-Beijing (BJ) version, and the assessment is available from [www.mocatest.org](http://www.mocatest.org). Chen tested the reliability and validity of the MoCA-BJ in people with obstructive sleep apnea-hypopnea syndrome. The Cronbach's  $\alpha$  of the MoCA-BJ was 0.73<sup>[36]</sup>.

The sleep quality of the PWDs was assessed by the PSQI where the PWDs and their caregivers answered the index. PSQI was developed by Buysse in 1989 and was translated by Liu<sup>[37]</sup>. The sensitivity and specificity of the Chinese version of PSQI were 98.3% and 90.3%, respectively<sup>[37]</sup>. The PSQI is a self-report questionnaire that accesses seven dimensions of sleep during the past month. The seven dimensions included subjective sleep quality, sleep

latency, sleep duration, habitual sleep efficiency, sleep disturbances, use of sleeping medication, and daytime dysfunction. PSQI score ranged from 0 to 21, with higher scores representing poorer subjective sleep quality<sup>[37]</sup>.

The abilities of daily life were assessed by the ADL scale. The response was recorded from the dementia caregivers. The scale was modified by Mingyuan Zhang<sup>[38]</sup>. It included 20 items with stable reliability and validity<sup>[38]</sup>. Each item score ranged from 1 (completely independent) to 4 (completely dependent). The total score ranged from 20 to 80, with a lower score indicating a higher level of ADL.

The behavioral and psychological symptoms of PWDs were assessed by the NPI answered by the dementia caregivers. The inventory was used to evaluate the severity and frequency of 10 common abnormal behaviors in PWDs<sup>[39]</sup>. Tao<sup>[39]</sup> translated the inventory and tested the reliability and validity of the Chinese version among persons with Alzheimer's disease. The Chinese version of NPI is a reliable and valid tool for measuring neuropsychiatric disturbances in people with AD.

## DATA ANALYSIS

To summarize the socio-demographic status and clinical characteristics, descriptive statistics were used. For continuous variables, mean and standard deviation (SD) were reported, and for categorical variables, numbers and proportions were reported. The univariate linear regression was used to test the association between demographic, PWDs' disease-related, and caregivers' caregiving-related variables and caregiver burden. Then only the statistically significant variables were entered into the multivariate linear regression. The statistically significant value of the univariate linear regression was set as  $p < 0.1$ <sup>[40]</sup>. Categorical variables were transferred to dummy variables. The coding of the variables is shown in Table 1. The Statistical package for social science (SPSS) 26.0 was used to analyze the data. The statistically significant value was  $p < 0.05$ .

Multiple regression analysis was performed to examine the moderating effect of social support on the relationship between caregiver burden and caregivers' depressive symptom. Caregiver burden and depressive symptom reduced on receiving social support.

## RESULT

In total, 109 dyads of PWDS and their caregivers were included in the study. Of these PWDs, 37(33.3%) were diagnosed with AD, 15(13.5%) with frontotemporal dementia, 22(19.8%) with mixed dementia, 12(10.8%) with DLB, and 23(20.7%) with VaD. The average age of the PWDs was  $76.02 \pm 8.78$  years. The percentage of females was 57.8%. Among 109 PWDs, 83 (76.1%) have received education till high school education or above, 12(11.0%) studied till middle school, 7(6.4%) till primary school, and 7(6.4%) were illiterate. The average MoCA was

1 12.50  $\pm$  5.84. The average PSQI was 5.57  $\pm$  5.00. Eighty (72.1%) PWDs reported poor sleep quality. Socio-  
2 demographic and disease characteristics of the PWDs are shown in Table 2.  
3

4 The mean age of the caregivers was 65.18  $\pm$  12.03 years. The percentage of females was 58.7%. Among the 109  
5 caregivers, 66 (50.6%) were spouses, and 42 (36.7%) were children of the PWDs. 86 (77.0%) caregivers cared for the  
6 PWDs for 1 to 4 years. 53 (47.7%) caregivers spent 21 to 40 hours per week on caregiving. The mean score of CBI  
7 was 65.92  $\pm$  16.74, which indicated a high level of caregiver burden. The average score of five domains of CBI  
8 shown in Figure 2. The socio-demographic characteristics of the caregivers and caregiver burden are shown in Table  
9 3.  
10  
11  
12  
13  
14  
15

16 The results of univariate and multivariate linear regression were shown in Table 4. PWD age, MoCA, PAC,  
17 community service utilization, and the level of social support all had a significant impact on caregiver burden. MoCA,  
18 PAC, and social support of caregivers were negatively associated with caregiver burden ( $\beta = -0.84$ ,  $p < 0.001$ ,  $\beta = -$   
19 3.61,  $p = 0.03$ , and  $\beta = -1.22$ ,  $p = 0.001$ , respectively), which indicated better PWDs' cognitive function, more PAC  
20 and a higher level of social support were related to less caregiver burden. The community service utilization were  
21 positively associated with caregiver burden ( $\beta = 3.46$ ,  $p < 0.001$ ), which indicated more community service utilization  
22 were related to more caregiver burden.  
23  
24  
25  
26  
27  
28  
29  
30

31 The moderation effect of social support on the relationship between caregiver burden and caregivers' depressive  
32 symptom was tested. The level of social support independently contributed to caregivers' depressive symptom.  
33 Specifically, a higher level of caregiver burden displayed a high level of depressive symptom ( $b = 0.1235$ ,  $p < 0.001$ ).  
34 Moreover, the two-way interaction between social support and caregiver burden significantly contributed to  
35 caregivers' depressive symptom (unstandardized  $B = -0.027$ ,  $p = 0.011$ ), as reflected in Figure 3.  
36  
37  
38  
39  
40

## 41 DISCUSSION

42 The level of caregiver burden in the present study was relatively higher than that in previous studies<sup>[15],[16]</sup>. The  
43 study conducted by Wang et al. in central China demonstrated that the average CBI score of dementia caregivers was  
44 44.6  $\pm$  10.2<sup>[15]</sup>. Liu et al. reported that the average CBI scores for caregivers with mild dementia, moderate dementia,  
45 and severe dementia were 19.63  $\pm$  10.75, 36.48  $\pm$  14.20, and 45.29  $\pm$  10.71, respectively in Beijing<sup>[16]</sup>. The caregiver  
46 burden level of our study was higher than that in previous studies conducted in Central and Northern China. It may be  
47 due to the different sample source. Our participants were recruited from the general communities in Shanghai. Wang's  
48 study sampled from the Clinical medical Center of Dementia and Cognitive Impairment in Hubei Province while Liu's  
49 Study sampled from 24 military communities in Beijing. The participants from the clinical center were able to get  
50 professional guidance while the participants from the military community can easily get the service and supplies from  
51  
52  
53  
54  
55  
56  
57  
58  
59  
60

1 the military support compared to the general communities. Our study was a cross-sectional study to explore the level  
2 of caregiver burden and factors related to it in PWDs in communities of Shanghai. After controlling for covariates,  
3 PWDs' cognitive function, PAC, social support, and community service utilization were significantly associated with  
4 caregiver burden. Social support was a moderator for the relationship between caregiver burden and caregivers'  
5 depressive symptoms.  
6  
7  
8  
9

10 Firstly, the present study has shown that worse cognitive function and older age of PWDs are related to higher  
11 caregiver burden, which is consistent with the previous studies in Beijing and Taiyuan of China<sup>[16,41]</sup>. Dementia is  
12 always accompanied by neuropsychiatric behaviors and decreased ADL<sup>[42]</sup>. With disease progression, PWD's  
13 dependence on their caregiver increases. The participants suffered from moderate to severe cognitive dysfunction in  
14 our study, and the age of the caregivers ( $65.18 \pm 12.03$  years) in our research was more than in previous  
15 studies( $57.5 \pm 12.3$ )<sup>[16]</sup>.  
16  
17  
18  
19  
20  
21  
22

23 Secondly, the level of caregiver burden in our study was relatively high compared to western countries, which  
24 can be attributed to the different social environments, cultures, healthcare policies, ethnicity, and age of  
25 caregivers<sup>[23,42,43]</sup>. Caregiver burden was defined as "a multidimensional response to physical, psychological,  
26 emotional, social, and financial stressors associated with the caregiving experience"<sup>[44]</sup>. Caregiver burden derived from  
27 the perceived stressors is influenced by psychosocial factors like social, environmental, and cultural<sup>[42]</sup>. A cultural  
28 sense of caregiving obligation may augment the distress and burden felt by the caregivers<sup>[26]</sup>. Sharing family affairs  
29 with outsiders is not acceptable in Chinese culture<sup>[25]</sup>. A strong sense of family responsibility may prevent caregivers  
30 from sharing their caregiving burnout with others. These aspects are not conducive to releasing the burden of  
31 caregiving.  
32  
33  
34  
35  
36  
37  
38  
39  
40

41 Thirdly, although an LTC insurance policy has been introduced since 2016 in 15 cities of China, many PWDs  
42 were not included in the policy in the pilot phase<sup>[24]</sup>. The LTC insurance policy was still fragmented. The serious  
43 problem included service coverage, service beneficiaries, funding source, payment rates, medical service & senior  
44 service, supply option, public-private partnership, and management capacity. Therefore, the actual coverage did not  
45 match the actual needs of the disabled elderly<sup>[45]</sup>. The policy did not cover the participants in our study who were from  
46 Hongkou District until January 2018, the participants may not be covered by the LTC insurance policy during the  
47 interview period. Informal care from family members is the primary source of care for PWDs in China. However, due  
48 to the rapid socioeconomic shifts and changing demographic structure, reliance on the care provided by families has  
49 become untenable<sup>[23]</sup>. Formal care in most high-income countries has evolved into the home-and community-based  
50 care<sup>[23]</sup>. The situation might be responsible for more caregiver burden in our study compared to other countries.  
51  
52  
53  
54  
55  
56  
57  
58  
59  
60

1 Community service was delivered at community healthcare centers. Caregivers needed to take PWDs to community  
2 healthcare centers to accept such service. The traffic between home and community healthcare centers may increase  
3 caregiver burden. The reimbursement of community service by China's healthcare insurance was limited. Without the  
4 support of insurance, community service utilization may cause an additional financial burden to dementia caregivers.  
5 It has been reported that informal dementia caregivers seldom used respite services<sup>[46]</sup>. The service provided in the  
6 communities healthcare centers was limited and it has not met the needs of the PWDs' caregivers<sup>[47]</sup>. The gap between  
7 diverse needs of PWDs' caregivers and limited supportive community services, especially home visiting services is  
8 needed to be closed in the future.

9 PAC was known to be associated with a lower level of caregiver burden<sup>[48]</sup>. The positive aspects of caregiving  
10 refer to the satisfaction and reward stemming from the caregiving relationship<sup>[49]</sup>. PAC is associated with a higher  
11 level of well-being and better health condition of caregiver<sup>[49]</sup>. Furthermore, PAC can help caregivers cope with  
12 challenges related to caregiving<sup>[49]</sup>. Therefore, we found that a higher level of PAC was associated with a lower level  
13 of caregiver burden. For further analysis, after controlling for age of PWDs, MoCA, NPI, ADL of PWDs, social  
14 support, and community service utilization to caregiver burden the regression analysis showed that the outlook on life  
15 (sub-domain of PAC) was associated with caregiver burden ( $\beta=-0.45$ ,  $p<0.001$ ), while the association of self-  
16 affirmation (sub-domain of PAC) and caregiver burden was not statistically significant ( $\beta=0.14$ ,  $p=0.25$ ). The outlook  
17 of life contributed the most to the protective effect on caregiver burden.

18 We found that caregivers with low-level social support had more depressive symptoms than those with high-level  
19 social support. Caregiver burden and depression are complex clinical and social problems<sup>[50]</sup>. Depression of caregivers  
20 was associated with providing care, social isolation, limited money, and decreased leisure time<sup>[51]</sup>. It has been reported  
21 that a higher level of social support is associated with a lower level of caregiver burden<sup>[52]</sup>. In our study, dementia  
22 caregivers received social support from family members, relatives, neighbors, and colleagues. An earlier study has  
23 confirmed that emotional support like reassurance from supporters is critical in reducing depressive symptoms<sup>[53]</sup>.  
24 Social support positively influences resilience, and caregivers with strong family support depict elevated resilience<sup>[54]</sup>.  
25 Besides, it has been found that sharing in the caregiving role can reduce the caregiver burden effectively<sup>[53]</sup>. Therefore,  
26 strengthening social support for caregivers may diminish the adverse effects of depressive symptoms in them.

27 The results of this study confirmed that the caregiver burden of PWDs was relatively high, and it was dependent  
28 on the factors associated with both PWD and the caregiver. Some of these factors could not be altered, such as PWDs'  
29 cognitive function. However, social support and community service are modifiable. Supportive services can be made  
30 readily available for dementia caregivers to relieve the caregiver burden. According to the China pilot, LTC insurance

1 policy, the level of disability of older adults is assessed to determine whether the individual met the criterion of long-  
2 term care insurance. However, the assessment in European and American countries is more in-depth and  
3 comprehensive and more detailed regarding specific diseases such as dementia<sup>[55,56]</sup>. The evaluation in China is  
4 required to be refined in the future. The Chinese government is now continuously improving the LTC insurance  
5 policy, and the coverage is extending to more cities. LTC insurance can provide more specific services to PWDs and  
6 caregivers to alleviate depression and reduce their burden. LTC insurance may also effectively reduce the financial  
7 burden of PWDs in the future<sup>[57]</sup>.

15 This study had a few limitations also. The participants were recruited from the Hongkou district, part of the  
16 center of Shanghai with high socioeconomic status, advanced community services, and improved healthcare resources.  
17 Therefore, findings from this study may be restricted as caregiver burden is expected to be higher among family  
18 caregivers living in more disadvantaged areas. A large multi-site study is needed to confirm the conclusions of this  
19 study. Moreover, the study was cross-sectional; thus, the cause-and-effect relationships were not established, and it  
20 was not possible to explore the trajectory of caregiver burden of PWD across different stages of the disease.  
21 Longitudinal studies are required to overcome these limitations in the future.

## 29 **CONCLUSION**

31 This study highlights the emerging issues of dementia and the burden perceived by their family caregivers living  
32 in Shanghai communities. Furthermore, the factors associated with caregiver burden were explored. The result  
33 verified that caregiver burden is substantial among the family caregivers of PWDs. The cognitive function of PWD,  
34 caregivers' perceived social support, and community service utilization were found to be associated with caregiver  
35 burden. Providing adequate social support and home-visit service may alleviate the caregiver burden.

## 41 **ETHICS STATEMENT**

43 The study was reviewed and approved by the Institutional Review Board (IRB) of Changzheng Hospital, Second  
44 Military Medical University. Written informed consent was taken from PWDs/participants for this study. The IRB  
45 approval number was 2019SL026.

## 49 **CONFLICT OF INTEREST**

51 Authors have no conflict of interest to declare.

## 53 **FUNDING**

55 This work was supported by Science and Technology Support Projects in Biomedicine Field of Shanghai Science  
56 and Technology Commission (#19441907500); Medical Innovation Projects of Second Military Medical University  
57 military (#2017JS07); Science and Technology Action Innovation program by the Science and Technology

1 Commission of Shanghai (#17411950104); Characteristic Services of Veteran Cadres Memory Disorders Diagnosis  
2 and Treatment in Changzheng hospital (2020CZWJFW12); Shanghai Pujiang Program(#18PJC115) and Naval  
3  
4  
5 Medical University Nursing Discipline Talent Training Program (18QPBJ06).

## 6 **ACKNOWLEDGMENTS**

7  
8 We thank Dr. Yan Zhang for her contribution to data collection.

## 9 **CONTRIBUTORSHIP STATEMENT**

10  
11  
12 Zhijian Liu designed the concept, analyzed data, interpreted data, and prepared the manuscript.

13  
14  
15 Wenjing Sun designed the concept, analyzed data, interpreted data, and prepared the manuscript.

16  
17  
18 Honglin Chen designed the concept, analyzed data, interpreted data, and prepared the manuscript.

19  
20  
21 Jianhua Zhuang interpreted the outcome and reviewed the manuscript.

22  
23  
24 Bei Wu, interpreted the outcome and reviewed the manuscript.

25  
26  
27 Hanzhang Xu, interpreted the outcome and reviewed the manuscript.

28  
29  
30 Peng Li, collected the data.

31  
32  
33 Xiaohan Chen, collected the data.

34  
35  
36 You Yin, designed the concept, interpreted the outcome, and reviewed the manuscript.

37  
38  
39 Juan Li, designed the concept, interpreted the outcome, and reviewed manuscript

40  
41  
42 All authors have read and approved the submission and ensure that this is the case.

## 43 **DATA AVAILABILITY STATEMENT**

44  
45  
46 Data are available upon reasonable request.

## 47 **REFERENCES**

- 48 [1]. World Health Organization. (2015). World report on aging and health.
- 49 [2]. Prince, M., Bryce, R., Albanese, E., Wimo, A., Ribeiro, W., & Ferri, C. P.. (2013). The global prevalence of  
50 dementia: a systematic review and meta-analysis. *Alzheimer's & Dementia*, 9(1), 63–75.e2. DOI:  
51 10.1016/j.jalz.2012.11.007
- 52 [3]. United Nations Department of Economic and Social Affairs Population Division. World population ageing, 2017.
- 53 [4]. Ding, D. , Zhao, Q. , Guo, Q. , Meng, H. , Wang, B. , & Yu, P. Luo, J., Zhou, Y. , Yu, L. , Zheng, L. . (2014). The  
54 shanghai aging study: study design, baseline characteristics, and prevalence of dementia. *Neuroepidemiology*,  
55 43(2), 114–122. DOI:10.1159/000366163.

- 1 [5]. American Psychiatric Association. (2000). Diagnostic and statistical manual of mental disorders, Fourth Edition:  
2 DSM-IV-TR®. Washington DC: American Psychiatric Pub.
- 3  
4 [6]. Xu, J. , Jian, W. , Anders, W. , Laura, F. , & Qiu, C.. (2017). The economic burden of dementia in China, 1990–  
5 2030: implications for health policy. *Bulletin of the World Health Organization*, 95(1), 18. DOI:  
6 10.2471/BLT.15.167726.
- 7  
8 [7]. Zarit, S. H. , Todd, P. A. , Zarit, J. M. . (1986). Subjective burden of husbands and wives as caregivers: a  
9 longitudinal study. *Gerontologist*, 26(3), 260–266. DOI: 10.1093/geront/26.3.260.
- 10  
11 [8]. Bertrand, R., M. . (2006). Are all caregivers created equal? stress in caregivers to adults with and without  
12 dementia. *Journal of Aging & Health*, 18(4), 534. DOI:10.1177/0898264306289620.
- 13  
14 [9]. Kim, M.D., et al. (2009). Caregiver burden among caregivers of Koreans with dementia. *Gerontology*, 55, 106–  
15 113. DOI: 10.1159/000176300.
- 16  
17 [10].Gallagher, D., Mhaolain, A. N., Crosby, L., Ryan, D., & Lawlor, B. A.. (2011). Self-efficacy for managing  
18 dementia may protect against burden and depression in alzheimer’s caregivers. *Aging and Mental Health*, 15(6),  
19 663–670. DOI: 10.1080/13607863.2011.562179.
- 20  
21 [11].Yeager, C. A., Hyer, L. A., Hobbs, B., & Coyne, A. C.. (2010). Alzheimer’s disease and vascular dementia: the  
22 complex relationship between diagnosis and caregiver burden. *Issues in Mental Health Nursing*, 31(6), 376. DOI:  
23 10.3109/01612840903434589.
- 24  
25 [12].Conde-Sala, J. L., Garre-Olmo, J., O Turró-Garriga, Vilalta-Franch, J., & S López-Pousa. (2010). Differential  
26 features of burden between spouse and adult-child caregivers of patients with Alzheimer’s disease: an exploratory  
27 comparative design. *International Journal of Nursing Studies*, 47(10), 1262–1273. DOI:  
28 10.1016/j.ijnurstu.2010.03.001.
- 29  
30 [13].Chan, C. Y., Cheung, G., Martinez-Ruiz, A., Chau, P. Y. K., & Wong, E. L. Y.. (2021). Caregiving burnout of  
31 community-dwelling people with dementia in Hongkong and New Zealand: a cross-sectional study. *BMC*  
32 *Geriatrics*, 21(1). DOI: 10.1186/s12877-021-02153-6.
- 33  
34 [14].Liu, S., Li, C., Shi, Z., Wang, X., Zhou, Y., Liu, S., Liu, J., Yu, T., Ji, Y.(2016). Caregiver burden and prevalence  
35 of depression, anxiety and sleep disturbances in Alzheimer’s disease caregivers in China. *Journal of Clinical*  
36 *Nursing*. DOI:10.1111/jocn.13601.
- 37  
38 [15].Min, Wang, Huimin, et al. Prevalence and associated factors of elder abuse in family caregivers of older people  
39 with dementia in central China: a cross-sectional study. [J]. *International journal of geriatric psychiatry*, 2018.  
40 DOI: 10.1002/gps.5020.
- 41  
42  
43  
44  
45  
46  
47  
48  
49  
50  
51  
52  
53  
54  
55  
56  
57  
58  
59  
60



- 1 [16].Jia L , Wang L N , Tan J P , et al. Burden, anxiety and depression in caregivers of veterans with dementia in  
2 Beijing [J]. Arch Gerontol Geriatr, 2012, 55(3):560–563. DOI: 10.1016/j.archger.2012.05.014.
- 3  
4 [17].Abdollahpour, I., Nedjat, S., & Salimi, Y. (2018). Positive Aspects of Caregiving and Caregiver Burden: A Study  
5 of Caregivers of Patients With Dementia. Journal of geriatric psychiatry and neurology, 31(1), 34–38.  
6  
7 https://doi.org/10.1177/0891988717743590.
- 8  
9 [18].Ross, E.. (2004). Psychosocial approaches to health, illness and disability: A reader for health care  
10 professionals [M].  
11  
12 [19].Cohen, S., Mckay, G.. (1984). Social support, stress, and the buffering hypothesis: A theoretical analysis.  
13 Hillsdale. DOI: 10.4324/9781003044307–10.  
14  
15 [20].Thoits, P. A.. (1982). Conceptual, methodological, and theoretical problems in studying social support as a buffer  
16 against life stress. J Health Soc Behav, 23(2), 145 – 159. DOI:10.2307/2136511.  
17  
18 [21].Chou, K. R.. (2000). Caregiver burden: a concept analysis. Journal of Pediatric Nursing, 15(6), 398–407. DOI:  
19 10.1053/jpdn.2000.16709. DOI: 10.1053/jpdn.2000.16709.  
20  
21 [22].Wang, Z., Ma, C., Han, H., He, R., Zhou, L., Liang, R., & Yu, H. (2018). Caregiver burden in Alzheimer's  
22 disease: Moderation effects of social support and mediation effects of positive aspects of caregiving. International  
23 journal of geriatric psychiatry, 10.1002/gps.4910. Advance online publication. https://doi.org/10.1002/gps.4910.  
24  
25 [23].Du, P., Dong, T., Ji, J.. (2020). Current status of the long-term care security system for older adults in China.  
26 Research on Aging, 43(3), 016402752094911. DOI:10.1177/0164027520949117.  
27  
28 [24].Feng, J., Wang, Z., Yu, Y.. (2020). Does long-term care insurance reduce hospital utilization and medical  
29 expenditures? evidence from China. Social Science & Medicine, 258, 113081. DOI:  
30 10.1016/j.socscimed.2020.113081.  
31  
32 [25].Chan, Wai-Chi S. Family caregiving in dementia: the Asian perspective of a global problem [J]. Dementia &  
33 Geriatric Cognitive Disorders, 2010, 30(6):469–478. DOI: 10.1159/000322086.  
34  
35 [26].Brando, D., Ribeiro, O., Oliveira, M., & Constana Paúl. (2017). Caring for a centenarian parent: an exploratory  
36 study on role strains and psychological distress. Scandinavian Journal of Caring Sciences, 31(4).  
37 DOI:10.1111/scs.12423.  
38  
39 [27].Freek, G., Judith, B., Myrra, V. D., Bernard, V., Philip, S., Van, P. J., Joling, K. J., Mary, M. , Van, W. J.. (2008).  
40 (cost)-effectiveness of family meetings on indicated prevention of anxiety and depressive symptoms and disorders  
41 of primary family caregivers of patients with dementia: design of a randomized controlled trial. BMC Geriatrics,  
42 8. DOI:10.1186/1471–2318–8–2.  
43  
44  
45  
46  
47  
48  
49  
50  
51  
52  
53  
54  
55  
56  
57  
58  
59  
60

- [28].Cohen, J.. (1988). *Statistical power analysis for the behavioral sciences* (2nd ed.. L. Erlbaum Associates:407.  
DOI: 10.1080/00401706.1989.10488618.
- [29].Novak, M., Guest, C.. (1989). Application of a multidimensional caregiver burden inventory. *Gerontologist*,  
29(6), 798–803. DOI:10.1093/geront/29.6.798.
- [30].Chou, K. R. , Jiann-Chyun, L. , Chu, H. . (2002). The reliability and validity of the Chinese version of the  
caregiver burden inventory. *Nursing Research*, 51(5), 324. DOI:10.1097/00006199-200209000-00009.
- [31].Torrìsi, M., Cola, M., Marra, A. , Luca, R. D. , RS Calabrò. (2017). Neuropsychiatric symptoms in dementia may  
predict caregiver burden: a sicilian exploratory study. *Psychogeriatrics*, 17(2), 103–107. DOI:10.1111/psyg.12197.
- [32].ZUNG, William, W. K. . (1965). A self-rating depression scale. *Archives of General Psychiatry*, 12(1), 63.  
DOI:10.1001/archpsyc.1965.01720310065008.
- [33].Chen, H., Chi, I. , Liu, R. . (2018). Hospital utilization among Chinese older adults: patterns and predictors.  
*Journal of Aging and Health*, 31, 089826431878054. DOI:10.1177/0898264318780546.
- [34].Zhang, R.. (2007). Reliability and validity of Chinese version of positive aspects of caregiving. *Chinese Journal  
of Nursing*. [http://en.cnki.com.cn/Article\\_en/CJFDTOTAL-ZHHL200712005.htm](http://en.cnki.com.cn/Article_en/CJFDTOTAL-ZHHL200712005.htm).
- [35].Nasreddine Z S, Phillips N A , Valérie Bédirian, et al. The Montreal Cognitive Assessment, MoCA: A Brief  
Screening Tool For Mild Cognitive Impairment[J]. *Journal of the American Geriatrics Society*, 2005, 53(4):695-  
699. DOI: 10.1111/j.1532-5415.2005.53221.x.
- [36].Chen X., Zhang R. , Xiao Y. , Dong J. , Niu X. , Kong W. (2015). Reliability and Validity of the Beijing Version  
of the Montreal Cognitive Assessment in the Evaluation of Cognitive Function of Adult Patients with OSAHS.  
*PLoS One*, 10(7), e0132361. DOI:10.1371/journal.pone.0132361.
- [37].Liu, X. C., Tang, M. Q. Hu, L., Wang, A. Z. ,Wu, H. X. , Zhao, G. F., Gao, C. N., Li, W. S.. (1996). Reliability  
and validity of the Pittsburgh sleep quality index. *Chinese Journal of Psychiatry*, 29(2), 29103–29107.
- [38].Guo Q, Hong Z. (2016). *Neuropsychological Assessment*. 2nd Ed. Shanghai: Shanghai science and technology  
press.
- [39].Wang T, Xiao S F, Wang H, Liu Y Y, Su N, Fang Y R. (2021). Reliability and validity of the Chinese version of  
the neuropsychiatric inventory in mainland China. *Int J Geriatr Psychiatry*, 27(5):539–544.  
DOI:10.1002/gps.2757.
- [40].Bursac, Z., Gauss, C. H., Williams, D. K., & Hosmer, D. W.. (2008). Purposeful selection of variables in logistic  
regression. *Source Code for Biology and Medicine*, 3(1), 17. DOI:10.1186/1751-0473-3-17.

- [41]. Yu, H., Wang, X., He, R., Liang, R., & Zhou, L. (2015). Measuring the Caregiver Burden of Caring for Community-Residing People with Alzheimer's Disease. *PloS one*, 10(7), e0132168.  
DOI:10.1371/journal.pone.0132168.
- [42]. Saari Toni., Hallikainen Ilona., Hintsu Taina., Koivisto Anne M.(2019). Neuropsychiatric symptoms and activities of daily living in Alzheimer's disease: ALSOVA 5-year follow-up study. *Int Psychogeriatr*, undefined(undefined), 1–11. DOI:10.1017/S1041610219001571.
- [43]. Allen Andrew P., Buckley Maria M., Cryan John F., Ní Chorcoráin Aoife., Dinan Timothy G., Kearney Patricia M., O'Caomh Rónán., Calnan Mareeta., Clarke Gerard., Molloy D William.(2019). Informal caregiving for dementia patients: the contribution of patient characteristics and behaviours to caregiver burden. *Age Ageing*, 49(1), 52–56. DOI:10.1093/ageing/afz128.
- [44]. Kasuya, R. T. , Polgar-Bailey, P. , Takeuchi, R. . (2001). Caregiver burden and burnout: a guide for primary care physicians. *Postgraduate Medicine*, 108(7), 119–123. DOI:10.3810/pgm.2000.12.1324.
- [45]. Zhou, W., & Dai, W. (2021). Shifting from Fragmentation to Integration: A Systematic Analysis of Long-Term Care Insurance Policies in China. *International journal of integrated care*, 21(3), 11.  
<https://doi.org/10.5334/ijic.5676>.
- [46]. Su, J. A. , Chang, C. C. . (2020). Association between family caregiver burden and affiliate stigma in the families of people with dementia. *International Journal of Environmental Research and Public Health*, 17(8).  
DOI:10.3390/ijerph17082772.
- [47]. Lin W. (2016). Community service contracting for older people in urban China: a case study in Guangdong Province. *Australian journal of primary health*, 22(1), 55–62. <https://doi.org/10.1071/PY15085>.
- [48]. Xue, H. , Zhai, J. , He, R. , Zhou, L. , Liang, R. , Yu, H. . (2018). Moderating role of positive aspects of caregiving in the relationship between depression in persons with Alzheimer's disease and caregiver burden. *Psychiatry Research*, 261, 400. DOI:10.1016/j.psychres.2017.12.088.
- [49]. Tarlow, B. J. , Wisniewski, S. R. , Belle, S. H. , Rubert, M. , Gallagher-Thompson, D. . (2004). Positive aspects of caregiving: contributions of the reach project to the development of new measures for alzheimer's caregiving. *Research on Aging*, 26(4), 429–453. DOI:10.1177/0164027504264493.
- [50]. Springate, B. , Tremont, G. . (2013). Caregiver burden and depression in mild cognitive impairment. *Journal of Applied Gerontology*, 32(6), 765–775. DOI:10.1177/0733464811433486.
- [51]. Simpson, C. , Carter, P. . (2013). Dementia behavioral and psychiatric symptoms: effect on caregiver's sleep. *Journal of Clinical Nursing*, 22(21–22). DOI:10.1111/jocn.12127.

- [52].Xian, M. , Xu, L. . (2019). Social support and self-rated health among caregivers of people with dementia: the mediating role of caregiving burden. *Dementia* (2), 147130121983746. DOI:10.1177/1471301219837464.
- [53].Huang, C. Y. , Musil, C. M. , Zauszniewski, J. A. , Wykle, M. L. . (2006). Effects of social support and coping of family caregivers of older adults with dementia in Taiwan. *Int J Aging Hum Dev*, 63(1), 1–25. DOI:10.2190/72JU-ABQA-6L6F-G98Q.
- [54].Cohen, S., Mckay, G.. (1984). Social support, stress, and the buffering hypothesis: A theoretical analysis. Hillsdale. <http://www.psy.cmu.edu/~scohen/buffer84.pdf>.
- [55].Shanghai Municipal Government. (2016). Shanghai’s pilot Measures for long-term care Insurance.
- [56].Zeng, Q., Wang, Q., Zhang, L., Xu, X.. (2020). Comparison of the measurement of long-term care costs between China and other countries: a systematic review of the last decade. *Healthcare*, 8(2), 117. DOI:10.3390/healthcare8020117.
- [57].Chen, L., Zhang, X., Xu, X.. (2020). Health insurance and long-term care services for the disabled elderly in China: based on CHARLS data. *Risk Management and Healthcare Policy*, Volume 13, 155–162. DOI:10.2147/RMHP.S233949.

### Figure legends

**Figure1.Flow chart of the sampling.** Flow chart to identify how the participants were recruited in the study.

**Figure 2. Average score of five domains of the Caregiver burden index.** The Average score of the five domains of the Caregiver Burden Index were shown in the figure.

**Figure 3. Moderation effect of social support on the relationship between caregiver burden and caregivers’ depressive symptom. Social support was the moderate variables in the relationship.** The effect of caregiver burden on depressive symptoms varies with different levels of social support.

Table 1: List of the associated variables

| Associated variables              | Variables       |                      | Coding                   |
|-----------------------------------|-----------------|----------------------|--------------------------|
| Socio-demographic characteristics | Age             | Continuous variable  |                          |
|                                   | Gender          | Categorical variable | Male = 1, female = 0     |
|                                   | Education level | Categorical variable | Illiteracy = 1           |
|                                   |                 |                      | Primary school = 2       |
|                                   |                 |                      | Middle school = 3        |
|                                   |                 |                      | High school or above = 4 |

|                               |                               |                      |                                                                                                                        |
|-------------------------------|-------------------------------|----------------------|------------------------------------------------------------------------------------------------------------------------|
|                               | Status of work                | Categorical variable |                                                                                                                        |
|                               | Relationship                  | Categorical variable | Spouse = 1<br>Children = 2<br>Relatives = 3                                                                            |
| Characteristics of disease    | Type of dementia              | Categorical variable | AD = 1, FTD = 2, MD = 3,<br>Lewy = 4, VD = 5                                                                           |
|                               | MoCA                          | Continuous variable  |                                                                                                                        |
|                               | PISQ                          | Continuous variable  |                                                                                                                        |
|                               | NPI                           | Continuous variable  |                                                                                                                        |
|                               | ADL                           | Continuous variable  |                                                                                                                        |
| Characteristics of caregivers | Caregiving years              | Categorical variable | No caring = 1<br><0.5years = 2<br>0.5years-1year = 3<br>1years-4years = 4<br>5years-9years = 5<br>More than 9years = 6 |
|                               | Education                     |                      |                                                                                                                        |
|                               | Caring hours/week             | Categorical variable | 0 hour-8 hours = 1<br>9 hours-20 hours = 2<br>21 hours-40 hours = 3<br>More than 40 hours = 4                          |
|                               | Depressive symptoms           | Continuous variable  |                                                                                                                        |
|                               | Coping Style Questionnaire    | Continuous variable  |                                                                                                                        |
|                               | PAC                           | Continuous variable  |                                                                                                                        |
|                               | Social support                | Continuous variable  |                                                                                                                        |
|                               | Community Service Utilization | Continuous variable  | Used = 1<br>Not used = 0                                                                                               |

AD = Alzheimer’s Disease; FTD =frontotemporal dementia; MD = mixed dementia; Lewy = Lewy body associated; VD =vascular dementia;  
PAC =positive aspects of caregivers.

Table 2: Social-demographic and disease characteristics of the PWDs

| Characteristics                   |                             | Mean ± SD    | N(%)      |
|-----------------------------------|-----------------------------|--------------|-----------|
| Socio-demographic characteristics | Age(year)                   | 76.02 ± 8.78 |           |
|                                   | Gender                      |              |           |
|                                   | <i>Female</i>               |              | 63(57.8%) |
|                                   | Education level             |              |           |
|                                   | <i>Below primary school</i> |              | 14(12.8%) |
|                                   | <i>Middle school</i>        |              | 12(11.0%) |
|                                   | <i>High school or above</i> |              | 83(76.1)  |
| Disease characteristics           | Type of dementia            |              |           |
|                                   | <i>Alzheimer's</i>          |              | 37(33.3%) |
|                                   | <i>Frontotemporal</i>       |              | 15(13.5%) |
|                                   | <i>Mixed</i>                |              | 22(19.8%) |

|    |                                  |               |           |
|----|----------------------------------|---------------|-----------|
| 1  | <i>Lewy bodies-associated</i>    |               | 12(10.8%) |
| 2  | <i>Vascular dementia</i>         |               | 23(20.7%) |
| 3  | MoCA total score                 | 12.50 ± 5.84  |           |
| 4  | NPI total symptom scale          | 21.50 ± 14.94 |           |
| 5  | ADL total score                  | 42.94 ± 14.17 |           |
| 6  | Poor Sleep quality               |               | 80(72.1%) |
| 7  | Score of PSQI                    | 5.57 ± 5.00   |           |
| 8  | <i>Subjective Sleep Quality</i>  | 0.85 ± 1.02   |           |
| 9  | <i>Sleep Latency</i>             | 1.23 ± 2.01   |           |
| 10 | <i>Sleep Duration</i>            | 0.58 ± 0.83   |           |
| 11 | <i>Habitual Sleep Efficiency</i> | 0.64 ± 1.00   |           |
| 12 | <i>Sleep Disturbances</i>        | 0.64 ± 1.00   |           |
| 13 | <i>Use of Sleep Medications</i>  | 1.34 ± 1.49   |           |
| 14 | <i>Daytime Dysfunction</i>       | 1.34 ± 1.49   |           |

NPI = the Neuropsychiatric Inventory; PSQI = Pittsburgh Sleep Quality Index; ADL =activities of daily life

Table 3: Social-demographic characteristics and caregiver burden of caregivers

| Characteristics                | Mean ± SD     | n(%)      |
|--------------------------------|---------------|-----------|
| Age(year)                      | 65.18 ± 12.03 |           |
| Gender                         |               |           |
| <i>Female</i>                  |               | 64(58.7%) |
| Education level                |               |           |
| <i>Below primary school or</i> |               | 12(11.0%) |
| <i>Middle school</i>           |               | 12(11.0%) |
| <i>High school or above</i>    |               | 85(78.0%) |
| Relationship with PWDs         |               |           |
| <i>Spouse</i>                  |               | 66(59.5%) |
| <i>Children</i>                |               | 42(38.5%) |
| <i>Relatives</i>               |               | 3(2.7%)   |
| Caregiving hours/week(h)       |               |           |
| <20                            |               | 12(10.8%) |
| 21–40                          |               | 53(47.7%) |
| >40                            |               | 44(39.6%) |
| Caregiving year (years)        |               |           |
| ≤1                             |               | 12(11%)   |
| 1 - 5                          |               | 86(77.5%) |
| >5                             |               | 11(10.1%) |
| Score of SDS                   | 25.53 ± 3.84  |           |
| PAC                            | 29.49 ± 3.86  |           |
| Coping strategy                | 92.90 ± 5.78  |           |
| Social Support                 | 8.61 ± 1.32   |           |
| Community Service Utilization  | 2.46 ± 1.74   |           |
| Score of CBI                   | 65.92 ± 16.74 |           |

|   |                               |              |
|---|-------------------------------|--------------|
| 1 | <i>Time-Dependence Burden</i> | 16.03 ± 5.59 |
| 2 | <i>Development Burden</i>     | 13.72 ± 3.93 |
| 3 | <i>Physical Burden</i>        | 9.79 ± 3.48  |
| 4 | <i>Social Burden</i>          | 7.09 ± 3.07  |
| 5 | <i>Emotional Burden</i>       | 10.28 ± 3.50 |

7 **CBI =caregiver burden inventory; SDS = Self-rating Depression Scale; PAC =Positive aspects of caregiving.**

11 Table 4: Linear regression of CBI

| Variables                      | Univariate analyses |        |       |        |       | Multivariate analyses |        |      |       |       |
|--------------------------------|---------------------|--------|-------|--------|-------|-----------------------|--------|------|-------|-------|
|                                | b                   | p      | SE    | 95%CI  |       | b                     | p      | SE   | 95%CI |       |
|                                |                     |        |       | Lower  | Upper |                       |        |      | Lower | Upper |
| 20 Age of PWDs                 | 0.48                | 0.008  | 0.18  | 0.126  | 0.835 | 0.11                  | 0.19   |      |       |       |
| 22 Gender of PWDs              | 0.41                | 0.90   | 3.26  | -6.06  | 6.87  |                       |        |      |       |       |
| 24 Education level of PWDs     |                     |        |       |        |       |                       |        |      |       |       |
| 26 <i>Primary school</i>       | -10.43              | 0.25   | 9.00  | -28.28 | 7.42  |                       |        |      |       |       |
| 28 <i>Middle school</i>        | -1.79               | 0.82   | 8.01  | -17.67 | 14.09 |                       |        |      |       |       |
| 30 <i>High school or above</i> | -4.60               | 0.49   | 6.63  | -17.74 | 8.54  |                       |        |      |       |       |
| 32 Type of dementia            |                     |        |       |        |       |                       |        |      |       |       |
| 34 <i>FTD</i>                  | -3.65               | 0.48   | 5.11  | -13.78 | 6.49  |                       |        |      |       |       |
| 36 <i>MD</i>                   | 2.624               | 0.56   | 4.96  | -6.29  | 11.54 |                       |        |      |       |       |
| 38 <i>Lewy</i>                 | -1.65               | 0.77   | 5.55  | -12.65 | 9.35  |                       |        |      |       |       |
| 40 <i>VD</i>                   | 6.74                | 0.13   | 4.43  | -2.05  | 15.54 |                       |        |      |       |       |
| 42 Score of MoCA               | -0.80               | 0.003  | 0.10  | -1.33  | -0.27 | -0.84                 | <0.001 | 0.22 | -1.29 | -0.40 |
| 44 Total score of NPI          | 0.30                | 0.005  | 0.06  | 0.09   | 0.50  | 0.16                  | 0.05   |      |       |       |
| 46 Score of ADL                | 0.41                | <0.001 | 0.11  | 0.20   | 0.63  | 0.14                  | 0.13   |      |       |       |
| 48 Score of PSQI               | 0.33                | 0.60   | 0.001 | -0.304 | 0.973 |                       |        |      |       |       |
| 50 Age of caregivers           | 0.14                | 0.30   | 0.32  | -0.13  | 0.40  |                       |        |      |       |       |
| 52 Education level of          |                     |        |       |        |       |                       |        |      |       |       |
| 53 caregivers                  |                     |        |       |        |       |                       |        |      |       |       |
| 55 <i>Primary school</i>       | 14.75               | 0.15   | 10.28 | -5.66  | 35.13 |                       |        |      |       |       |
| 57 <i>Middle school</i>        | 5.75                | 0.55   | 9.69  | -13.46 | 24.96 |                       |        |      |       |       |
| 59 <i>High school or above</i> | 7.31                | 0.40   | 8.59  | -9.71  | 24.34 |                       |        |      |       |       |

|    |                          |        |        |       |        |        |       |        |      |       |       |
|----|--------------------------|--------|--------|-------|--------|--------|-------|--------|------|-------|-------|
| 1  | Relationship             |        |        |       |        |        |       |        |      |       |       |
| 2  |                          |        |        |       |        |        |       |        |      |       |       |
| 3  | <i>Children</i>          | 3.71   | 0.27   | 3.31  | -2.85  | 10.26  |       |        |      |       |       |
| 4  |                          |        |        |       |        |        |       |        |      |       |       |
| 5  | <i>Relatives</i>         | -17.71 | 0.07   | 9.74  | -37.02 | 1059   |       |        |      |       |       |
| 6  | Caregiving time for each |        |        |       |        |        |       |        |      |       |       |
| 7  | week                     |        |        |       |        |        |       |        |      |       |       |
| 8  |                          |        |        |       |        |        |       |        |      |       |       |
| 9  | <i>9 - 20</i>            | -5.00  | 0.65   | 10.94 | -26.67 | 16.70  |       |        |      |       |       |
| 10 |                          |        |        |       |        |        |       |        |      |       |       |
| 11 | <i>21-40</i>             | -0.93  | 0.93   | 9.74  | -20.24 | 18.39  |       |        |      |       |       |
| 12 |                          |        |        |       |        |        |       |        |      |       |       |
| 13 | <i>&gt;40</i>            | 6.89   | 0.48   | 9.80  | -12.54 | 26.31  |       |        |      |       |       |
| 14 |                          |        |        |       |        |        |       |        |      |       |       |
| 15 | caregiving years         |        |        |       |        |        |       |        |      |       |       |
| 16 |                          |        |        |       |        |        |       |        |      |       |       |
| 17 | <i>0.5</i>               | -17.00 | 0.36   | 18.28 | -53.45 | 19.45  |       |        |      |       |       |
| 18 |                          |        |        |       |        |        |       |        |      |       |       |
| 19 | <i>0.5-1</i>             | -15.78 | 0.32   | 15.82 | -47.15 | 15.59  |       |        |      |       |       |
| 20 |                          |        |        |       |        |        |       |        |      |       |       |
| 21 | <i>1 - 4</i>             | -12.44 | 0.41   | 15.09 | -42.37 | 17.49  |       |        |      |       |       |
| 22 |                          |        |        |       |        |        |       |        |      |       |       |
| 23 | <i>5-9</i>               | 11.86  | 0.46   | 16.04 | -19.95 | 43.67  |       |        |      |       |       |
| 24 |                          |        |        |       |        |        |       |        |      |       |       |
| 25 | <i>&gt;9</i>             | 16.00  | 0.34   | 16.78 | -17.27 | 49.27  |       |        |      |       |       |
| 26 |                          |        |        |       |        |        |       |        |      |       |       |
| 27 | PAC                      | -1.33  | 0.001  | 0.40  | -2.12  | -0.54  | -1.22 | 0.001  | 0.34 | -1.90 | -0.55 |
| 28 |                          |        |        |       |        |        |       |        |      |       |       |
| 29 | Coping strategy          | -0.25  | 0.38   | 0.28  | -0.80  | 0.31   |       |        |      |       |       |
| 30 |                          |        |        |       |        |        |       |        |      |       |       |
| 31 | Social Support           | -3.32  | 0.006  | 1.18  | -5.667 | -0.972 | -3.61 | <0.001 | 0.99 | -5.58 | -1.64 |
| 32 |                          |        |        |       |        |        |       |        |      |       |       |
| 33 | Community Service        | 3.54   | <0.001 | 0.87  | 1.82   | 5.26   | 3.46  | <0.001 | 0.76 | 1.96  | 4.96  |
| 34 | Utilization              |        |        |       |        |        |       |        |      |       |       |
| 35 |                          |        |        |       |        |        |       |        |      |       |       |

AD = Alzheimer's Disease ;FTD =frontotemporal dementia ;MD = mixed dementia ;Lewy = Lewy body associated; VD =vascular dementia;

PAC =positive aspects of caregivers; NPI = the Neuropsychiatric Inventory; PSQI = Pittsburgh Sleep Quality Index; ADL =activities of daily life.



1 **8800 people aged over 60 were**  
2 **randomly selected from 7**  
3 **communities**

4 **Finished self-rating scale Alzheimer's disease-8 (AD8)**

5  
6 **8549**

7 **AD8 $\geq$ 2**

8  
9  
10  
11  
12 **2272**

13 **Randomly chose to receive Mini-Mental State**  
14 **Examination (MMSE)**

15  
16  
17  
18 **500**

19 **MMSE < 26**

20  
21  
22  
23  
24 **456**

25 **Diagnosed with dementia by the neurologists**

26  
27  
28  
29  
30 **116**

31 **Seven refused to participate in the study**

32  
33  
34  
35  
36 **For peer review only - <http://bmjopen.bmj.com/site/about/guidelines.xhtml>**

37 **109**  
38  
39  
40

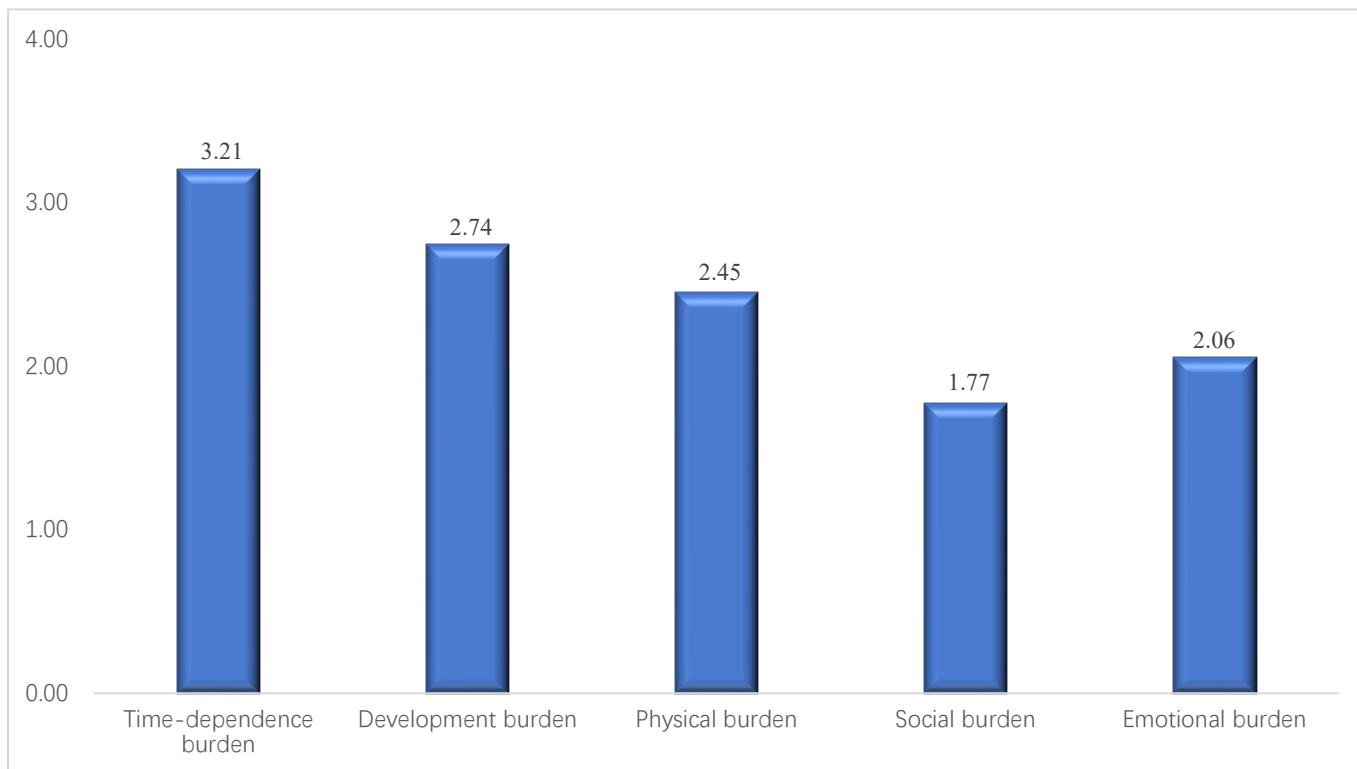

**Figure 2: Average score of five domains of the Caregiver burden index.**

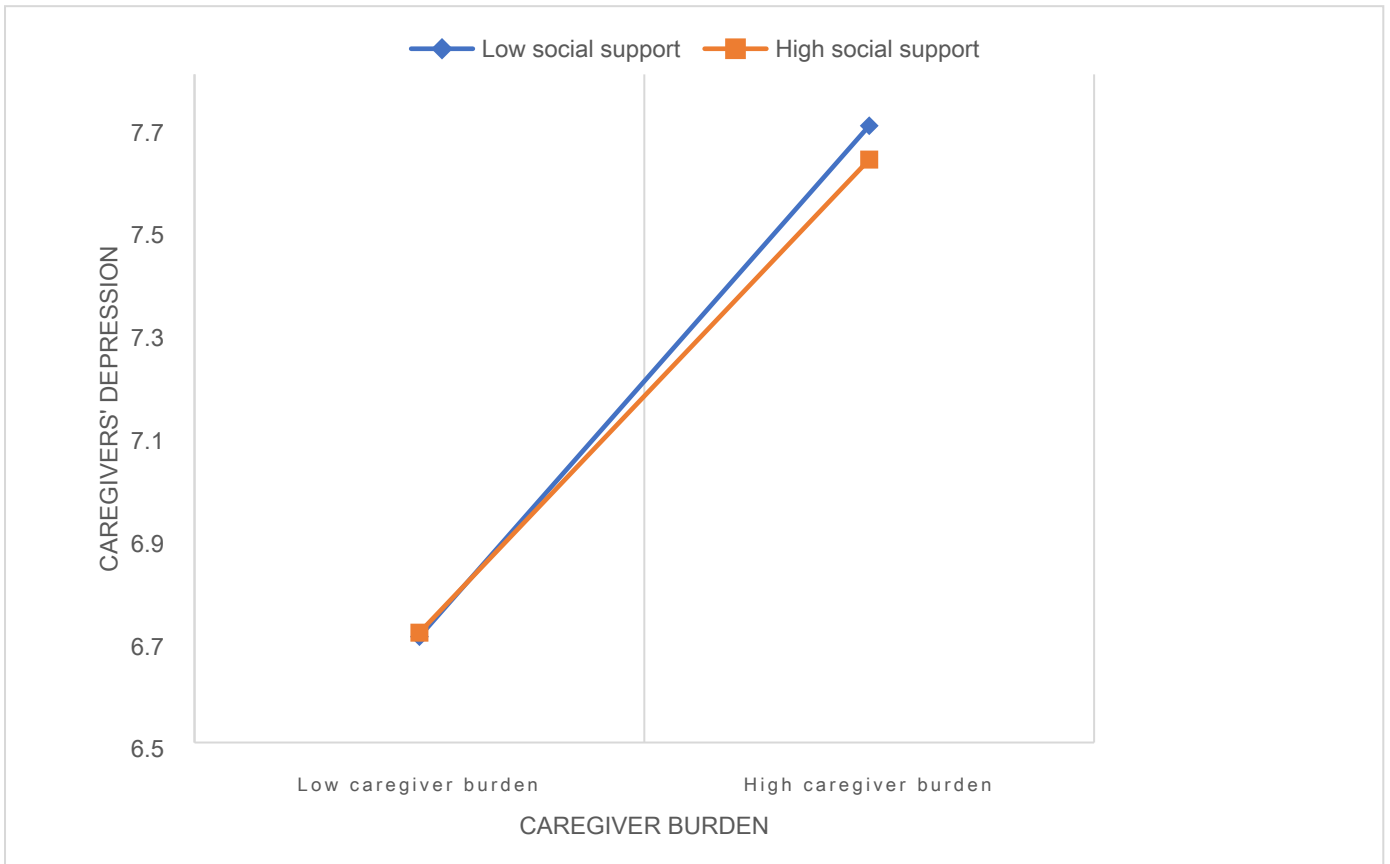

**Figure 3 Moderation effect of social support on the relationship between caregiver burden and caregivers' depressive symptom.**

STROBE Statement—Checklist of items that should be included in reports of *cross-sectional studies*

|                              | Item No | Recommendation                                                                                                                                                                                    | Page No        |
|------------------------------|---------|---------------------------------------------------------------------------------------------------------------------------------------------------------------------------------------------------|----------------|
| <b>Title and abstract</b>    | 1       | (a) Indicate the study's design with a commonly used term in the title or the abstract                                                                                                            | 1              |
|                              |         | (b) Provide in the abstract an informative and balanced summary of what was done and what was found                                                                                               | 1              |
| <b>Introduction</b>          |         |                                                                                                                                                                                                   |                |
| Background/rationale         | 2       | Explain the scientific background and rationale for the investigation being reported                                                                                                              | 1-2            |
| Objectives                   | 3       | State specific objectives, including any prespecified hypotheses                                                                                                                                  | 3              |
| <b>Methods</b>               |         |                                                                                                                                                                                                   |                |
| Study design                 | 4       | Present key elements of study design early in the paper                                                                                                                                           | 3              |
| Setting                      | 5       | Describe the setting, locations, and relevant dates, including periods of recruitment, exposure, follow-up, and data collection                                                                   | 3              |
| Participants                 | 6       | (a) Give the eligibility criteria, and the sources and methods of selection of participants                                                                                                       | 3              |
| Variables                    | 7       | Clearly define all outcomes, exposures, predictors, potential confounders, and effect modifiers. Give diagnostic criteria, if applicable                                                          | 4              |
| Data sources/<br>measurement | 8*      | For each variable of interest, give sources of data and details of methods of assessment (measurement). Describe comparability of assessment methods if there is more than one group              | 3              |
| Bias                         | 9       | Describe any efforts to address potential sources of bias                                                                                                                                         |                |
| Study size                   | 10      | Explain how the study size was arrived at                                                                                                                                                         | 3              |
| Quantitative variables       | 11      | Explain how quantitative variables were handled in the analyses. If applicable, describe which groupings were chosen and why                                                                      |                |
| Statistical methods          | 12      | (a) Describe all statistical methods, including those used to control for confounding                                                                                                             | 6              |
|                              |         | (b) Describe any methods used to examine subgroups and interactions                                                                                                                               | 6              |
|                              |         | (c) Explain how missing data were addressed                                                                                                                                                       | Not Applicable |
|                              |         | (d) If applicable, describe analytical methods taking account of sampling strategy                                                                                                                | 5              |
|                              |         | (e) Describe any sensitivity analyses                                                                                                                                                             | Not Applicable |
| <b>Results</b>               |         |                                                                                                                                                                                                   |                |
| Participants                 | 13*     | (a) Report numbers of individuals at each stage of study—eg numbers potentially eligible, examined for eligibility, confirmed eligible, included in the study, completing follow-up, and analysed | 6              |
|                              |         | (b) Give reasons for non-participation at each stage                                                                                                                                              | 3              |
|                              |         | (c) Consider use of a flow diagram                                                                                                                                                                | 20             |
| Descriptive data             | 14*     | (a) Give characteristics of study participants (eg demographic, clinical, social) and information on exposures and potential confounders                                                          | 6              |

|                          |     |                                                                                                                                                                                                              |                |
|--------------------------|-----|--------------------------------------------------------------------------------------------------------------------------------------------------------------------------------------------------------------|----------------|
|                          |     | (b) Indicate number of participants with missing data for each variable of interest                                                                                                                          | Not Applicable |
| Outcome data             | 15* | Report numbers of outcome events or summary measures                                                                                                                                                         | 7              |
| Main results             | 16  | (a) Give unadjusted estimates and, if applicable, confounder-adjusted estimates and their precision (eg, 95% confidence interval). Make clear which confounders were adjusted for and why they were included | 7              |
|                          |     | (b) Report category boundaries when continuous variables were categorized                                                                                                                                    | 16             |
|                          |     | (c) If relevant, consider translating estimates of relative risk into absolute risk for a meaningful time period                                                                                             | Not Applicable |
| Other analyses           | 17  | Report other analyses done—eg analyses of subgroups and interactions, and sensitivity analyses                                                                                                               | 7              |
| <b>Discussion</b>        |     |                                                                                                                                                                                                              |                |
| Key results              | 18  | Summarise key results with reference to study objectives                                                                                                                                                     | 7              |
| Limitations              | 19  | Discuss limitations of the study, taking into account sources of potential bias or imprecision. Discuss both direction and magnitude of any potential bias                                                   | 10             |
| Interpretation           | 20  | Give a cautious overall interpretation of results considering objectives, limitations, multiplicity of analyses, results from similar studies, and other relevant evidence                                   | 9              |
| Generalisability         | 21  | Discuss the generalisability (external validity) of the study results                                                                                                                                        | 8              |
| <b>Other information</b> |     |                                                                                                                                                                                                              |                |
| Funding                  | 22  | Give the source of funding and the role of the funders for the present study and, if applicable, for the original study on which the present article is based                                                | 10             |

\*Give information separately for exposed and unexposed groups.

**Note:** An Explanation and Elaboration article discusses each checklist item and gives methodological background and published examples of transparent reporting. The STROBE checklist is best used in conjunction with this article (freely available on the Web sites of PLoS Medicine at <http://www.plosmedicine.org/>, Annals of Internal Medicine at <http://www.annals.org/>, and Epidemiology at <http://www.epidem.com/>). Information on the STROBE Initiative is available at [www.strobe-statement.org](http://www.strobe-statement.org).
